# Supplementary material for: Genomic Characteristics of Invasive Streptococcus pneumoniae Serotype 1 in New Caledonia Prior to the Introduction of PCV13
Source: PubMed Central journal article supplement — Bioinform Biol Insights. 2020 Sep 29;14:1177932220962106. doi: 10.1177/1177932220962106 (PMC7545519; doi:10.1177/1177932220962106), 2020-09-29
Supplement: Supplementary_table_S1_xyz47336eb3788f3_1.pdf [file Supplementary_table_S1_xyz47336eb3788f3_1.pdf]

| SampleID   | Sequence type | Patient age(years) | Source of isolation |
|------------|---------------|--------------------|---------------------|
| 10395_8_21 | 306           | 14                 | Abscess             |
| 10395_8_56 | 306           | 57                 | Blood               |
| 10395_8_22 | 306           | 43                 | Blood               |
| 10395_8_52 | 306           | 51                 | Blood               |
| 10395_8_15 | 306           | 6                  | Blood               |
| 10263_7_16 | 306           | 64                 | Blood               |
| 10263_7_53 | 306           | 62                 | Blood               |
| 10395_8_17 | 306           | 53                 | Blood               |
| 10395_8_18 | 306           | 17                 | Blood               |
| 10395_8_36 | 3717          | 53                 | Blood               |
| 10395_8_54 | 306           | 32                 | Blood               |
| 10263_7_5  | 306           | 27                 | Blood               |
| 10395_8_1  | 306           | 44                 | Blood               |
| 10395_8_19 | 306           | 85                 | Blood               |
| 10395_8_55 | 306           | 21                 | Blood               |
| 10263_7_2  | 306           | 0                  | Blood               |
| 10395_8_24 | 306           | 2                  | Blood               |
| 10395_8_35 | 306           | 87                 | Blood               |
| 10395_8_20 | 3717          | 49                 | Blood               |
| 10395_8_29 | 306           | 58                 | Blood               |
| 10395_8_30 | 306           | 73                 | Blood               |
| 10263_7_46 | 306           | 64                 | Blood               |
| 10263_7_32 | 306           | 64                 | Blood               |
| 10395_8_33 | 306           | 32                 | Blood               |
| 10395_8_61 | 306           | 65                 | Blood               |
| 10395_8_34 | 306           | 4                  | Blood               |
| 10395_8_37 | 306           | 8                  | Blood               |
| 10395_8_31 | 306           | 63                 | Blood               |
| 10395_8_67 | 306           | 23                 | Blood               |
| 10263_7_63 | 306           | 44                 | Blood               |
| 10395_8_62 | 306           | 44                 | Blood               |
| 10263_7_11 | 306           | 5                  | Blood               |
| 10263_7_65 | 306           | 2                  | Blood               |
| 10395_8_66 | 306           | 63                 | Blood               |
| 10263_7_39 | 306           | 25                 | Blood               |
| 10263_7_3  | 306           | 7                  | Blood               |
| 10395_8_68 | 306           | 4                  | Blood               |
| 10395_8_42 | 306           | 4                  | Blood               |
| 10395_8_6  | 306           | 56                 | Blood               |
| 10395_8_8  | 306           | 21                 | Blood               |
| 10263_7_43 | 306           | 16                 | Blood               |
| 10263_7_49 | 306           | 25                 | Blood               |

|            |      |    |               |
|------------|------|----|---------------|
| 10395_8_50 | 306  | 19 | Blood         |
| 10395_8_51 | 306  | 1  | Blood         |
| 10395_8_28 | 306  | 77 | Blood         |
| 10395_8_38 | 306  | 3  | Blood         |
| 10263_7_47 | 306  | 24 | Blood         |
| 10702_4_42 | 306  | 2  | Carriage      |
| 10395_8_57 | 306  | 34 | CSF           |
| 10263_7_14 | 3717 | 0  | CSF           |
| 10395_8_13 | 306  | 3  | CSF           |
| 10263_7_40 | 3717 | 41 | CSF           |
| 10395_8_48 | 306  | 2  | Ear           |
| 10395_8_41 | 306  | 4  | Ear           |
| 10263_7_7  | 306  | 10 | Ear           |
| 10263_7_64 | 306  | 88 | Ear           |
| 10263_7_12 | 306  | 7  | Ear           |
| 10263_7_23 | 306  | 6  | Pleural Fluid |
| 10395_8_26 | 306  | 2  | Pleural Fluid |
| 10395_8_25 | 306  | 72 | Sputum        |
| 10263_7_44 | 306  | 49 | Sputum        |
| 10263_7_60 | 306  | 43 | Sputum        |
| 10263_7_45 | 306  | 65 | Sputum        |
| 10263_7_27 | 306  | 50 | Sputum        |
| 10395_8_58 | 306  | 68 | Sputum        |
| 10263_7_10 | 3717 | 31 | Sputum        |
| 10395_8_9  | 306  | 61 | Sputum        |

| Collection date(M,DD,YYYY) | Bioproject ID | Sample accession |
|----------------------------|---------------|------------------|
| 1/23/2008                  | PRJEB2102     | ERS242992        |
| 1/24/2009                  | PRJEB2102     | ERS243027        |
| 1/27/2008                  | PRJEB2102     | ERS242993        |
| 10/15/2008                 | PRJEB2102     | ERS243023        |
| 10/25/2007                 | PRJEB2102     | ERS242986        |
| 10/27/2007                 | PRJEB2102     | ERS242987        |
| 10/27/2008                 | PRJEB2102     | ERS243024        |
| 10/30/2007                 | PRJEB2102     | ERS242988        |
| 10/30/2007                 | PRJEB2102     | ERS242989        |
| 10/6/2008                  | PRJEB2102     | ERS243007        |
| 11/11/2008                 | PRJEB2102     | ERS243025        |
| 11/14/2006                 | PRJEB2102     | ERS242976        |
| 11/19/2004                 | PRJEB2102     | ERR351766        |
| 12/11/2007                 | PRJEB2102     | ERS242990        |
| 12/22/2008                 | PRJEB2102     | ERS243026        |
| 12/9/2005                  | PRJEB2102     | ERS242973        |
| 2/2/2008                   | PRJEB2102     | ERS242995        |
| 2/6/2008                   | PRJEB2102     | ERS243006        |
| 3/12/2007                  | PRJEB2102     | ERS242991        |
| 3/23/2008                  | PRJEB2102     | ERS243000        |
| 3/28/2008                  | PRJEB2102     | ERS243001        |
| 4/9/2008                   | PRJEB2102     | ERS243017        |
| 5/14/2008                  | PRJEB2102     | ERS243003        |
| 5/17/2008                  | PRJEB2102     | ERS243004        |
| 5/22/2009                  | PRJEB2102     | ERS243032        |
| 5/23/2008                  | PRJEB2102     | ERS243005        |
| 6/24/2008                  | PRJEB2102     | ERS243008        |
| 6/5/2008                   | PRJEB2102     | ERS243002        |
| 6/8/2009                   | PRJEB2102     | ERS243038        |
| 7/13/2009                  | PRJEB2102     | ERS243034        |
| 7/13/2009                  | PRJEB2102     | ERS243033        |
| 7/14/2007                  | PRJEB2102     | ERS242982        |
| 7/16/2009                  | PRJEB2102     | ERS243036        |
| 7/20/2009                  | PRJEB2102     | ERS243037        |
| 7/21/2008                  | PRJEB2102     | ERS243010        |
| 8/19/2006                  | PRJEB2102     | ERS242974        |
| 8/21/2009                  | PRJEB2102     | ERS243039        |
| 8/24/2008                  | PRJEB2102     | ERS243013        |
| 8/3/2007                   | PRJEB2102     | ERS242977        |
| 8/3/2007                   | PRJEB2102     | ERS242979        |
| 8/31/2008                  | PRJEB2102     | ERS243014        |
| 9/22/2008                  | PRJEB2102     | ERS243020        |

|            |           |           |
|------------|-----------|-----------|
| 9/27/2008  | PRJEB2102 | ERS243021 |
| 9/28/2008  | PRJEB2102 | ERS243022 |
| 9/3/2008   | PRJEB2102 | ERS242999 |
| 9/7/2008   | PRJEB2102 | ERS243009 |
| 9/9/2008   | PRJEB2102 | ERS243018 |
| 1/8/2008   | PRJEB2102 | ERS242975 |
| 1/30/2009  | PRJEB2102 | ERS243028 |
| 10/22/2007 | PRJEB2102 | ERS242985 |
| 12/10/2007 | PRJEB2102 | ERS242984 |
| 9/13/2009  | PRJEB2102 | ERS243011 |
| 10/9/2008  | PRJEB2102 | ERS243019 |
| 11/8/2008  | PRJEB2102 | ERS243012 |
| 5/21/2007  | PRJEB2102 | ERS242978 |
| 8/7/2009   | PRJEB2102 | ERS243035 |
| 9/13/2007  | PRJEB2102 | ERS242983 |
| 1/27/2009  | PRJEB2102 | ERS242994 |
| 2/2/2008   | PRJEB2102 | ERS242997 |
| 1/2/2008   | PRJEB2102 | ERS242996 |
| 1/9/2008   | PRJEB2102 | ERS243015 |
| 11/5/2009  | PRJEB2102 | ERS243031 |
| 2/9/2008   | PRJEB2102 | ERS243016 |
| 4/2/2008   | PRJEB2102 | ERS242998 |
| 4/2/2009   | PRJEB2102 | ERS243029 |
| 8/7/2007   | PRJEB2102 | ERS242981 |
| 8/7/2007   | PRJEB2102 | ERS242980 |

## Run accession

ERR351781  
ERR351816  
ERR351782  
ERR351812  
ERR351775  
ERR351776  
ERR351813  
ERR351777  
ERR351778  
ERR351796  
ERR351814  
ERR351765  
ERR351761  
ERR351779  
ERR351815  
ERR351762  
ERR351784  
ERR351795  
ERR351780  
ERR351789  
ERR351790  
ERR351806  
ERR351792  
ERR351793  
ERR351821  
ERR351794  
ERR351797  
ERR351791  
ERR351827  
ERR351823  
ERR351822  
ERR351771  
ERR351825  
ERR351826  
ERR351799  
ERR351763  
ERR351828  
ERR351802  
ERR351766  
ERR351768  
ERR351803  
ERR351809

ERR351810  
ERR351811  
ERR351788  
ERR351798  
ERR351807  
ERR373941  
ERR351817  
ERR351774  
ERR351773  
ERR351800  
ERR351808  
ERR351801  
ERR351767  
ERR351824  
ERR351772  
ERR351783  
ERR351786  
ERR351785  
ERR351804  
ERR351820  
ERR351805  
ERR351787  
ERR351818  
ERR351770  
ERR351769
