# Supplementary material for: Genomic Characteristics of Invasive Streptococcus pneumoniae Serotype 1 in New Caledonia Prior to the Introduction of PCV13
Source: PubMed Central journal article supplement — Bioinform Biol Insights. 2020 Sep 29;14:1177932220962106. doi: 10.1177/1177932220962106 (PMC7545519; doi:10.1177/1177932220962106), 2020-09-29
Supplement: Supplementary_table_S2_xyz47336b4575fa2.pdf [file Supplementary_table_S2_xyz47336b4575fa2.pdf]

| Lane       | Total Length | No Contigs | Avg Contig Length |
|------------|--------------|------------|-------------------|
| 10263_7#2  | 2.078.395    | 78         | 26646.09          |
| 10263_7#3  | 2081119      | 70         | 29730.27          |
| 10263_7#5  | 2079865      | 79         | 26327.41          |
| 10263_7#7  | 2072976      | 80         | 25912.2           |
| 10263_7#10 | 2072319      | 86         | 24096.73          |
| 10263_7#11 | 2076596      | 78         | 26623.03          |
| 10263_7#12 | 2079556      | 71         | 29289.52          |
| 10263_7#14 | 2084854      | 67         | 31117.22          |
| 10263_7#16 | 2085024      | 70         | 29786.06          |
| 10263_7#23 | 2082845      | 69         | 30186.16          |
| 10263_7#27 | 2076728      | 88         | 23599.18          |
| 10263_7#32 | 2080646      | 72         | 28897.86          |
| 10263_7#39 | 2084261      | 70         | 29775.16          |
| 10263_7#40 | 2054058      | 123        | 16699.66          |
| 10263_7#43 | 2088671      | 62         | 33688.24          |
| 10263_7#44 | 2087987      | 62         | 33677.21          |
| 10263_7#45 | 2086832      | 63         | 33124.32          |
| 10263_7#46 | 2084504      | 58         | 35939.72          |
| 10263_7#47 | 2088279      | 60         | 34804.65          |
| 10263_7#49 | 2089080      | 61         | 34247.21          |
| 10263_7#53 | 2088035      | 65         | 32123.62          |
| 10263_7#60 | 2085864      | 69         | 30229.91          |
| 10263_7#63 | 2076846      | 77         | 26972.03          |
| 10263_7#64 | 2072691      | 85         | 24384.6           |
| 10263_7#65 | 2074553      | 85         | 24406.51          |
| 10395_8#1  | 2075885      | 74         | 28052.5           |
| 10395_8#6  | 2074542      | 76         | 27296.61          |
| 10395_8#8  | 2074687      | 78         | 26598.55          |
| 10395_8#9  | 2076789      | 79         | 26288.47          |
| 10395_8#13 | 2091677      | 51         | 41013.27          |
| 10395_8#15 | 2087022      | 66         | 31621.55          |
| 10395_8#17 | 2078879      | 73         | 28477.79          |
| 10395_8#18 | 2081113      | 69         | 30161.06          |
| 10395_8#19 | 2080318      | 70         | 29718.83          |
| 10395_8#20 | 2083149      | 65         | 32048.45          |
| 10395_8#21 | 2087792      | 57         | 36627.93          |
| 10395_8#22 | 2082522      | 71         | 29331.3           |
| 10395_8#24 | 2085595      | 68         | 30670.51          |
| 10395_8#25 | 2074608      | 80         | 25932.6           |
| 10395_8#26 | 2078501      | 72         | 28868.07          |
| 10395_8#28 | 2069705      | 92         | 22496.79          |
| 10395_8#29 | 2080796      | 75         | 27743.95          |

|            |         |    |          |
|------------|---------|----|----------|
| 10395_8#30 | 2077093 | 74 | 28068.82 |
| 10395_8#31 | 2075486 | 80 | 25943.58 |
| 10395_8#33 | 2087717 | 66 | 31632.08 |
| 10395_8#34 | 2077084 | 81 | 25643.01 |
| 10395_8#35 | 2077304 | 73 | 28456.22 |
| 10395_8#36 | 2076547 | 75 | 27687.29 |
| 10395_8#37 | 2087458 | 63 | 33134.25 |
| 10395_8#38 | 2082657 | 60 | 34710.95 |
| 10395_8#41 | 2088431 | 58 | 36007.43 |
| 10395_8#42 | 2086567 | 66 | 31614.65 |
| 10395_8#48 | 2087585 | 65 | 32116.69 |
| 10395_8#50 | 2084776 | 70 | 29782.51 |
| 10395_8#51 | 2088986 | 64 | 32640.41 |
| 10395_8#52 | 2086430 | 66 | 31612.58 |
| 10395_8#54 | 2088806 | 70 | 29840.09 |
| 10395_8#55 | 2088382 | 68 | 30711.5  |
| 10395_8#56 | 2085825 | 66 | 31603.41 |
| 10395_8#57 | 2088389 | 61 | 34235.89 |
| 10395_8#58 | 2087815 | 66 | 31633.56 |
| 10395_8#61 | 2086980 | 64 | 32609.06 |
| 10395_8#62 | 2073837 | 76 | 27287.33 |
| 10395_8#66 | 2070269 | 85 | 24356.11 |
| 10395_8#67 | 2076334 | 77 | 26965.38 |
| 10395_8#68 | 2075942 | 74 | 28053.27 |
| 10702_4#42 | 2070144 | 88 | 23524.36 |

| Largest Contig | N50   | Contigs in N50 | N60   |
|----------------|-------|----------------|-------|
| 159586         | 50626 | 13             | 39816 |
| 192481         | 51879 | 12             | 43109 |
| 133296         | 48694 | 14             | 33639 |
| 135941         | 43491 | 14             | 34612 |
| 173782         | 42584 | 15             | 31227 |
| 140667         | 42924 | 14             | 31226 |
| 132089         | 51907 | 14             | 48694 |
| 149338         | 51879 | 12             | 42768 |
| 142386         | 51957 | 14             | 48697 |
| 203525         | 50301 | 13             | 38860 |
| 110933         | 40853 | 17             | 30963 |
| 114176         | 51915 | 14             | 47296 |
| 147254         | 51913 | 12             | 37689 |
| 90582          | 28667 | 24             | 23393 |
| 149321         | 55727 | 11             | 48905 |
| 148354         | 55346 | 12             | 51879 |
| 150952         | 55723 | 11             | 49024 |
| 157014         | 55331 | 11             | 48974 |
| 147239         | 55339 | 11             | 49209 |
| 180037         | 51913 | 11             | 48912 |
| 229220         | 51933 | 12             | 48712 |
| 186502         | 51456 | 12             | 40846 |
| 125674         | 51903 | 14             | 37692 |
| 132960         | 40711 | 16             | 31227 |
| 132089         | 40992 | 15             | 33492 |
| 155982         | 51903 | 12             | 38857 |
| 136276         | 47569 | 14             | 38848 |
| 135104         | 48750 | 14             | 33517 |
| 132140         | 49079 | 15             | 37672 |
| 150950         | 75544 | 10             | 55312 |
| 152809         | 51413 | 12             | 43879 |
| 132116         | 51887 | 14             | 47331 |
| 136351         | 51887 | 14             | 39820 |
| 136305         | 51885 | 14             | 48698 |
| 136295         | 55717 | 13             | 39813 |
| 158901         | 55705 | 10             | 50377 |
| 132919         | 55590 | 14             | 48544 |
| 177467         | 56852 | 12             | 49086 |
| 137650         | 47857 | 14             | 37684 |
| 133647         | 50351 | 14             | 39647 |
| 136277         | 39357 | 16             | 31227 |
| 136017         | 48697 | 15             | 33520 |

|        |       |    |       |
|--------|-------|----|-------|
| 135125 | 51272 | 15 | 37672 |
| 106111 | 48711 | 15 | 37672 |
| 189292 | 53574 | 13 | 48199 |
| 135991 | 49565 | 14 | 38709 |
| 132099 | 49828 | 15 | 37659 |
| 180043 | 48690 | 14 | 37685 |
| 156926 | 57523 | 11 | 48905 |
| 150981 | 58095 | 11 | 48899 |
| 167015 | 56693 | 10 | 49015 |
| 166205 | 55713 | 11 | 39823 |
| 147233 | 50383 | 12 | 42275 |
| 147209 | 49973 | 12 | 38857 |
| 158936 | 52677 | 12 | 48200 |
| 178693 | 53773 | 11 | 48711 |
| 147233 | 51451 | 13 | 47347 |
| 151891 | 49015 | 13 | 37676 |
| 149301 | 55729 | 12 | 49033 |
| 150949 | 58751 | 11 | 48771 |
| 149241 | 54766 | 13 | 48704 |
| 147225 | 51411 | 12 | 42924 |
| 177124 | 50603 | 13 | 37691 |
| 107996 | 39816 | 16 | 31223 |
| 135985 | 50520 | 15 | 38862 |
| 183993 | 50424 | 13 | 37669 |
| 124213 | 44815 | 15 | 30966 |

| Contigs in N60 | N70   | Contigs in N70 | N80   |
|----------------|-------|----------------|-------|
| 18             | 31077 | 24             | 23067 |
| 16             | 31098 | 22             | 24566 |
| 20             | 26256 | 26             | 22874 |
| 20             | 26163 | 26             | 22632 |
| 21             | 23903 | 28             | 21382 |
| 20             | 25412 | 27             | 22637 |
| 18             | 29955 | 24             | 22833 |
| 17             | 32129 | 22             | 24554 |
| 18             | 31239 | 24             | 24538 |
| 18             | 30043 | 24             | 23067 |
| 23             | 24572 | 30             | 21324 |
| 18             | 29966 | 24             | 23549 |
| 17             | 29975 | 23             | 22399 |
| 32             | 20375 | 41             | 12726 |
| 15             | 31426 | 20             | 24700 |
| 15             | 37689 | 20             | 26086 |
| 15             | 31299 | 20             | 24492 |
| 15             | 37667 | 19             | 26100 |
| 15             | 47284 | 19             | 31213 |
| 15             | 31238 | 20             | 25384 |
| 16             | 31254 | 21             | 24656 |
| 16             | 30620 | 22             | 23557 |
| 19             | 26102 | 25             | 22264 |
| 21             | 24538 | 29             | 21416 |
| 21             | 28647 | 28             | 21655 |
| 17             | 28647 | 23             | 22835 |
| 19             | 28667 | 25             | 22833 |
| 19             | 26103 | 26             | 22266 |
| 20             | 26102 | 27             | 22255 |
| 13             | 49506 | 17             | 37662 |
| 16             | 31211 | 22             | 24777 |
| 18             | 30966 | 24             | 23542 |
| 18             | 30600 | 24             | 24532 |
| 18             | 30598 | 24             | 22415 |
| 17             | 31098 | 22             | 24656 |
| 14             | 34572 | 19             | 26400 |
| 18             | 31095 | 24             | 24431 |
| 16             | 31217 | 21             | 24556 |
| 19             | 26093 | 26             | 22228 |
| 18             | 30976 | 24             | 23908 |
| 22             | 25812 | 29             | 20874 |
| 20             | 26103 | 26             | 22833 |

|    |       |    |       |
|----|-------|----|-------|
| 19 | 27711 | 26 | 22315 |
| 20 | 26103 | 27 | 21885 |
| 17 | 33542 | 22 | 26091 |
| 19 | 28647 | 25 | 22308 |
| 20 | 30076 | 26 | 23809 |
| 19 | 28647 | 25 | 22526 |
| 15 | 31422 | 20 | 25057 |
| 15 | 31225 | 20 | 24339 |
| 14 | 37669 | 19 | 27198 |
| 15 | 31428 | 21 | 25384 |
| 16 | 30600 | 23 | 24823 |
| 17 | 31229 | 23 | 25386 |
| 16 | 34972 | 21 | 24656 |
| 15 | 30600 | 21 | 24566 |
| 17 | 30600 | 23 | 22526 |
| 18 | 30576 | 24 | 24540 |
| 16 | 31239 | 22 | 25845 |
| 15 | 38851 | 19 | 29241 |
| 17 | 31094 | 23 | 24689 |
| 16 | 30596 | 22 | 24558 |
| 18 | 26103 | 25 | 21656 |
| 22 | 25806 | 29 | 21583 |
| 19 | 29453 | 26 | 23707 |
| 18 | 26100 | 25 | 22227 |
| 21 | 24566 | 28 | 20992 |

| Contigs in N80 | N90   | Contigs in N90 |
|----------------|-------|----------------|
| 32             | 14446 | 42             |
| 30             | 20369 | 39             |
| 35             | 14949 | 45             |
| 35             | 13421 | 46             |
| 37             | 11759 | 49             |
| 36             | 15055 | 46             |
| 32             | 16842 | 42             |
| 30             | 19994 | 39             |
| 31             | 18698 | 41             |
| 33             | 16916 | 43             |
| 39             | 12875 | 51             |
| 32             | 14464 | 42             |
| 31             | 16933 | 41             |
| 54             | 9157  | 72             |
| 27             | 19952 | 37             |
| 27             | 19987 | 36             |
| 28             | 16839 | 38             |
| 26             | 21985 | 35             |
| 25             | 21644 | 33             |
| 27             | 19999 | 36             |
| 28             | 18548 | 38             |
| 30             | 17615 | 40             |
| 34             | 12264 | 45             |
| 38             | 12675 | 50             |
| 37             | 12962 | 48             |
| 31             | 14997 | 41             |
| 33             | 15030 | 44             |
| 35             | 12875 | 47             |
| 36             | 14716 | 46             |
| 22             | 25378 | 29             |
| 29             | 21682 | 38             |
| 32             | 17914 | 42             |
| 32             | 19956 | 41             |
| 32             | 14960 | 42             |
| 30             | 20375 | 39             |
| 26             | 21683 | 35             |
| 31             | 18705 | 41             |
| 28             | 20375 | 38             |
| 34             | 14450 | 45             |
| 32             | 18869 | 42             |
| 38             | 11703 | 51             |
| 35             | 14324 | 46             |

|    |       |    |
|----|-------|----|
| 34 | 13465 | 45 |
| 36 | 12706 | 48 |
| 29 | 19454 | 38 |
| 33 | 12207 | 45 |
| 34 | 18536 | 43 |
| 34 | 14615 | 44 |
| 27 | 21179 | 36 |
| 28 | 21378 | 37 |
| 25 | 22420 | 34 |
| 29 | 19464 | 38 |
| 30 | 20359 | 39 |
| 30 | 20513 | 39 |
| 28 | 20162 | 37 |
| 29 | 18989 | 38 |
| 31 | 17913 | 40 |
| 32 | 21179 | 41 |
| 29 | 19988 | 38 |
| 26 | 22280 | 34 |
| 30 | 19990 | 40 |
| 30 | 18963 | 40 |
| 33 | 12973 | 45 |
| 38 | 12041 | 50 |
| 34 | 14448 | 44 |
| 34 | 14715 | 44 |
| 37 | 12041 | 50 |



| N100 | Contigs in N100 | scaffolds | Total Raw Reads |
|------|-----------------|-----------|-----------------|
| 350  | 78              | 3         | 3927586         |
| 348  | 70              | 5         | 3543962         |
| 334  | 79              | 6         | 3399440         |
| 492  | 80              | 6         | 3649262         |
| 429  | 86              | 4         | 3173368         |
| 361  | 78              | 5         | 3770616         |
| 440  | 71              | 4         | 3338854         |
| 435  | 67              | 12        | 3771812         |
| 443  | 70              | 1         | 3337958         |
| 439  | 69              | 3         | 3271054         |
| 449  | 88              | 12        | 3880538         |
| 350  | 72              | 3         | 3599472         |
| 451  | 70              | 0         | 3419124         |
| 336  | 123             | 0         | 1084002         |
| 680  | 62              | 63        | 3525342         |
| 428  | 62              | 7         | 3036896         |
| 654  | 63              | 1         | 4023210         |
| 445  | 58              | 2         | 3465662         |
| 382  | 60              | 3         | 3471634         |
| 436  | 61              | 5         | 3672046         |
| 437  | 65              | 2         | 3485734         |
| 380  | 69              | 2         | 3470584         |
| 354  | 77              | 2         | 3391326         |
| 447  | 85              | 9         | 3296298         |
| 316  | 85              | 8         | 3331720         |
| 361  | 74              | 1         | 4098592         |
| 456  | 76              | 6         | 3421190         |
| 316  | 78              | 0         | 3335602         |
| 504  | 79              | 0         | 3574744         |
| 748  | 51              | 15        | 3543182         |
| 319  | 66              | 5         | 3606690         |
| 386  | 73              | 2         | 3625508         |
| 361  | 69              | 22        | 3491264         |
| 395  | 70              | 0         | 3369600         |
| 449  | 65              | 29        | 3273084         |
| 308  | 57              | 4         | 3694918         |
| 447  | 71              | 1         | 4113904         |
| 319  | 68              | 16        | 3479370         |
| 319  | 80              | 2         | 3236188         |
| 448  | 72              | 2         | 3376104         |
| 359  | 92              | 2         | 3517348         |
| 361  | 75              | 2         | 3561238         |

|     |    |    |         |
|-----|----|----|---------|
| 471 | 74 | 3  | 3559826 |
| 337 | 80 | 5  | 3420946 |
| 547 | 66 | 5  | 3936770 |
| 397 | 81 | 4  | 3241948 |
| 335 | 73 | 0  | 3758958 |
| 361 | 75 | 1  | 3217102 |
| 353 | 63 | 17 | 3610888 |
| 361 | 60 | 1  | 3912570 |
| 437 | 58 | 4  | 3659184 |
| 449 | 66 | 2  | 3348892 |
| 446 | 65 | 2  | 3654684 |
| 431 | 70 | 1  | 3669158 |
| 397 | 64 | 7  | 3614644 |
| 355 | 66 | 0  | 3636006 |
| 305 | 70 | 16 | 3636264 |
| 604 | 68 | 19 | 3673912 |
| 449 | 66 | 70 | 3701982 |
| 553 | 61 | 1  | 3446954 |
| 339 | 66 | 3  | 3570780 |
| 317 | 64 | 5  | 3596522 |
| 329 | 76 | 31 | 3339382 |
| 338 | 85 | 2  | 3416638 |
| 326 | 77 | 2  | 3632406 |
| 399 | 74 | 3  | 3432546 |
| 319 | 88 | 1  | 4468414 |

| Reads Mapped | Reads Unmapped | Reads Paired | Reads Unpaired | Total Raw Bases | Total Bases Mapped |
|--------------|----------------|--------------|----------------|-----------------|--------------------|
| 3907689      | 19897          | 3927586      |                | 392758600       | 390768900          |
| 3414132      | 129830         | 3308878      | 105254         | 354396200       | 341413200          |
| 3303829      | 95611          | 3225100      | 78729          | 339944000       | 330382900          |
| 3609300      | 39962          | 3649262      |                | 364926200       | 360930000          |
| 3045865      | 127503         | 2960336      | 85529          | 317336800       | 304586500          |
| 3589416      | 181200         | 3490574      | 98842          | 377061600       | 358941600          |
| 3323590      | 15264          | 3338854      |                | 333885400       | 332359000          |
| 3671999      | 99813          | 3588864      | 83135          | 377181200       | 367199900          |
| 3260486      | 77472          | 3194988      | 65498          | 333795800       | 326048600          |
| 3146758      | 124296         | 3058094      | 88664          | 327105400       | 314675800          |
| 3856891      | 23647          | 3880538      |                | 388053800       | 385689100          |
| 3580942      | 18530          | 3599472      |                | 359947200       | 358094200          |
| 3404912      | 14212          | 3419124      |                | 341912400       | 340491200          |
| 979138       | 104864         | 1084002      |                | 108400200       | 97913800           |
| 3427227      | 98115          | 3346452      | 80775          | 352534200       | 342722700          |
| 3025362      | 11534          | 3036896      |                | 303689600       | 302536200          |
| 3999734      | 23476          | 4023210      |                | 402321000       | 399973400          |
| 3450600      | 15062          | 3465662      |                | 346566200       | 345060000          |
| 3453805      | 17829          | 3471634      |                | 347163400       | 345380500          |
| 3660656      | 11390          | 3672046      |                | 367204600       | 366065600          |
| 3391413      | 94321          | 3318510      | 72903          | 348573400       | 339141300          |
| 3359884      | 110700         | 3285878      | 74006          | 347058400       | 335988400          |
| 3369786      | 21540          | 3391326      |                | 339132600       | 336978600          |
| 3244175      | 52123          | 3296298      |                | 329629800       | 324417500          |
| 3304859      | 26861          | 3331720      |                | 333172000       | 330485900          |
| 3988968      | 109624         | 3915786      | 73182          | 409859200       | 398896800          |
| 3290181      | 131009         | 3203744      | 86437          | 342119000       | 329018100          |
| 3320642      | 14960          | 3335602      |                | 333560200       | 332064200          |
| 3536093      | 38651          | 3574744      |                | 357474400       | 353609300          |
| 3472077      | 71105          | 3424238      | 47839          | 354318200       | 347207700          |
| 3539056      | 67634          | 3492656      | 46400          | 360669000       | 353905600          |
| 3608689      | 16819          | 3625508      |                | 362550800       | 360868900          |
| 3470702      | 20562          | 3491264      |                | 349126400       | 347070200          |
| 3350201      | 19399          | 3369600      |                | 336960000       | 335020100          |
| 3207776      | 65308          | 3163698      | 44078          | 327308400       | 320777600          |
| 3679381      | 15537          | 3694918      |                | 369491800       | 367938100          |
| 4094606      | 19298          | 4113904      |                | 411390400       | 409460600          |
| 3469633      | 9737           | 3479370      |                | 347937000       | 346963300          |
| 3083109      | 153079         | 2998762      | 84347          | 323618800       | 308310900          |
| 3301093      | 75011          | 3247048      | 54045          | 337610400       | 330109300          |
| 3478543      | 38805          | 3517348      |                | 351734800       | 347854300          |
| 3489383      | 71855          | 3437510      | 51873          | 356123800       | 348938300          |

|         |        |         |       |           |           |
|---------|--------|---------|-------|-----------|-----------|
| 3482494 | 77332  | 3432160 | 50334 | 355982600 | 348249400 |
| 3337327 | 83619  | 3285720 | 51607 | 342094600 | 333732700 |
| 3878998 | 57772  | 3834530 | 44468 | 393677000 | 387899800 |
| 3144068 | 97880  | 3096874 | 47194 | 324194800 | 314406800 |
| 3690455 | 68503  | 3636926 | 53529 | 375895800 | 369045500 |
| 3149419 | 67683  | 3104300 | 45119 | 321710200 | 314941900 |
| 3532199 | 78689  | 3469572 | 62627 | 361088800 | 353219900 |
| 3848909 | 63661  | 3801016 | 47893 | 391257000 | 384890900 |
| 3646102 | 13082  | 3659184 |       | 365918400 | 364610200 |
| 3338651 | 10241  | 3348892 |       | 334889200 | 333865100 |
| 3599014 | 55670  | 3561426 | 37588 | 365468400 | 359901400 |
| 3618621 | 50537  | 3581348 | 37273 | 366915800 | 361862100 |
| 3598597 | 16047  | 3614644 |       | 361464400 | 359859700 |
| 3628888 | 7118   | 3636006 |       | 363600600 | 362888800 |
| 3572425 | 63839  | 3531332 | 41093 | 363626400 | 357242500 |
| 3630285 | 43627  | 3596540 | 33745 | 367391200 | 363028500 |
| 3611990 | 89992  | 3569558 | 42432 | 370198200 | 361199000 |
| 3438760 | 8194   | 3446954 |       | 344695400 | 343876000 |
| 3443123 | 127657 | 3404194 | 38929 | 357078000 | 344312300 |
| 3587567 | 8955   | 3596522 |       | 359652200 | 358756700 |
| 3277340 | 62042  | 3339382 |       | 333938200 | 327734000 |
| 3283722 | 132916 | 3214508 | 69214 | 341663800 | 328372200 |
| 3613632 | 18774  | 3632406 |       | 363240600 | 361363200 |
| 3296577 | 135969 | 3219296 | 77281 | 343254600 | 329657700 |
| 4442221 | 26193  | 4468414 |       | 446841400 | 444222100 |

| Bases Mapped | Average Read Length | Minimum Read Length | Average Quality | Insert Size Average | Insert Size Std Dev |
|--------------|---------------------|---------------------|-----------------|---------------------|---------------------|
| 388.613.603  | 100                 | 100                 | 34.6            | 210                 | 61.6                |
| 341249814    | 100                 | 100                 | 34.4            | 225.1               | 77.1                |
| 330244867    | 100                 | 100                 | 34.6            | 210.4               | 59.8                |
| 358838217    | 100                 | 100                 | 34.7            | 197.8               | 59.3                |
| 304449061    | 100                 | 100                 | 34.6            | 200.7               | 56                  |
| 358780017    | 100                 | 100                 | 34.6            | 212.5               | 65.9                |
| 330534762    | 100                 | 100                 | 34.5            | 225.6               | 70.9                |
| 367051395    | 100                 | 100                 | 34.6            | 215.6               | 66.2                |
| 325921261    | 100                 | 100                 | 34.6            | 215.3               | 66.7                |
| 314541784    | 100                 | 100                 | 34.6            | 212                 | 61.7                |
| 383416926    | 100                 | 100                 | 34.6            | 206.6               | 61.4                |
| 356128273    | 100                 | 100                 | 34.5            | 218.5               | 70.3                |
| 339001512    | 100                 | 100                 | 34.5            | 218                 | 65.5                |
| 95990134     | 100                 | 100                 | 33.4            | 213.7               | 69.3                |
| 342580530    | 100                 | 100                 | 34.5            | 231.8               | 76.6                |
| 301297167    | 100                 | 100                 | 34.5            | 221.2               | 70.5                |
| 398249231    | 100                 | 100                 | 34.5            | 236                 | 70.6                |
| 343350442    | 100                 | 100                 | 34.4            | 243.1               | 97.4                |
| 344058689    | 100                 | 100                 | 34.6            | 218                 | 65.3                |
| 364651371    | 100                 | 100                 | 34.6            | 219.9               | 68.7                |
| 338999840    | 100                 | 100                 | 34.5            | 221.2               | 68.6                |
| 335849213    | 100                 | 100                 | 34.5            | 215.4               | 65.4                |
| 334974001    | 100                 | 100                 | 34.6            | 208                 | 62.8                |
| 321953077    | 100                 | 100                 | 34.4            | 211.3               | 65.1                |
| 327592751    | 100                 | 100                 | 34.6            | 212.6               | 68.7                |
| 398790347    | 100                 | 100                 | 37.5            | 205.6               | 62.9                |
| 328915010    | 100                 | 100                 | 37.4            | 220.6               | 82.7                |
| 330757141    | 100                 | 100                 | 37.5            | 206                 | 66.1                |
| 352401034    | 100                 | 100                 | 37.5            | 212.5               | 66                  |
| 347141599    | 100                 | 100                 | 37.4            | 223.8               | 74.3                |
| 353835674    | 100                 | 100                 | 37.5            | 214                 | 63.2                |
| 359701458    | 100                 | 100                 | 37.5            | 217.3               | 65.2                |
| 346096663    | 100                 | 100                 | 37.5            | 215                 | 67.5                |
| 334082450    | 100                 | 100                 | 37.4            | 218.7               | 67.4                |
| 320711738    | 100                 | 100                 | 37.5            | 220.1               | 70.3                |
| 367070104    | 100                 | 100                 | 37.4            | 219.4               | 73.6                |
| 408399919    | 100                 | 100                 | 37.5            | 210.4               | 69.3                |
| 345980282    | 100                 | 100                 | 37.5            | 218.1               | 69.8                |
| 308209434    | 100                 | 100                 | 37.3            | 210.4               | 63.6                |
| 330029092    | 100                 | 100                 | 37.5            | 206.4               | 60.5                |
| 345777598    | 100                 | 100                 | 37.4            | 206.3               | 67                  |
| 348856535    | 100                 | 100                 | 37.5            | 215.2               | 67.3                |

|           |     |     |      |       |      |
|-----------|-----|-----|------|-------|------|
| 348170925 | 100 | 100 | 37.5 | 213.2 | 64.3 |
| 333656397 | 100 | 100 | 37.5 | 210.9 | 60.8 |
| 387823369 | 100 | 100 | 37.4 | 228.4 | 70.8 |
| 314328747 | 100 | 100 | 37.4 | 207.4 | 59.1 |
| 368963353 | 100 | 100 | 37.5 | 218.2 | 61.3 |
| 314870250 | 100 | 100 | 37.5 | 213.1 | 64.2 |
| 353141437 | 100 | 100 | 37.2 | 257.5 | 92.7 |
| 384815276 | 100 | 100 | 37.4 | 220.2 | 69.2 |
| 363901097 | 100 | 100 | 37.4 | 227.2 | 73.8 |
| 333187674 | 100 | 100 | 37.4 | 215.7 | 69   |
| 359831157 | 100 | 100 | 37.5 | 214.4 | 67.5 |
| 361793455 | 100 | 100 | 37.5 | 213   | 63.9 |
| 359038668 | 100 | 100 | 37.4 | 222   | 71.4 |
| 362207295 | 100 | 100 | 37.5 | 220.3 | 69.4 |
| 357173622 | 100 | 100 | 37.4 | 226.1 | 70.1 |
| 362964444 | 100 | 100 | 37.4 | 215.2 | 64.2 |
| 361125851 | 100 | 100 | 37.3 | 214.1 | 64.2 |
| 343207803 | 100 | 100 | 37.5 | 227.4 | 66.3 |
| 344248381 | 100 | 100 | 37.4 | 224.6 | 64.3 |
| 358004882 | 100 | 100 | 37.4 | 227.5 | 76.6 |
| 325336696 | 100 | 100 | 37.1 | 216.6 | 72.9 |
| 328280847 | 100 | 100 | 37.4 | 212.4 | 63.8 |
| 360010506 | 100 | 100 | 37.4 | 217   | 66.2 |
| 329557541 | 100 | 100 | 37.3 | 210.4 | 64   |
| 441997574 | 100 | 100 | 35.9 | 254.8 | 58.6 |

| No. genes | No. CDS genes |
|-----------|---------------|
| 2119      | 2037          |
| 2114      | 2047          |
| 2125      | 2053          |
| 2102      | 2036          |
| 2109      | 2034          |
| 2109      | 2039          |
| 2122      | 2041          |
| 2138      | 2059          |
| 2140      | 2054          |
| 2137      | 2057          |
| 2110      | 2032          |
| 2117      | 2051          |
| 2134      | 2055          |
| 2069      | 1999          |
| 2154      | 2070          |
| 2148      | 2065          |
| 2144      | 2066          |
| 2139      | 2063          |
| 2145      | 2066          |
| 2147      | 2068          |
| 2149      | 2065          |
| 2152      | 2060          |
| 2109      | 2035          |
| 2107      | 2030          |
| 2114      | 2038          |
| 2115      | 2037          |
| 2108      | 2043          |
| 2101      | 2034          |
| 2115      | 2039          |
| 2161      | 2083          |
| 2140      | 2058          |
| 2128      | 2043          |
| 2127      | 2045          |
| 2122      | 2049          |
| 2139      | 2053          |
| 2145      | 2067          |
| 2132      | 2053          |
| 2149      | 2060          |
| 2109      | 2036          |
| 2121      | 2047          |
| 2102      | 2031          |
| 2119      | 2044          |

|      |      |
|------|------|
| 2110 | 2044 |
| 2108 | 2027 |
| 2148 | 2064 |
| 2110 | 2041 |
| 2111 | 2043 |
| 2105 | 2038 |
| 2149 | 2066 |
| 2135 | 2059 |
| 2157 | 2073 |
| 2145 | 2067 |
| 2142 | 2064 |
| 2136 | 2053 |
| 2154 | 2068 |
| 2142 | 2065 |
| 2150 | 2062 |
| 2160 | 2072 |
| 2149 | 2062 |
| 2145 | 2067 |
| 2153 | 2068 |
| 2147 | 2058 |
| 2111 | 2035 |
| 2108 | 2029 |
| 2114 | 2038 |
| 2120 | 2041 |
| 2101 | 2026 |
