# Supplementary material for: Genomic Characteristics of Invasive Streptococcus pneumoniae Serotype 1 in New Caledonia Prior to the Introduction of PCV13
Source: PubMed Central journal article supplement — Bioinform Biol Insights. 2020 Sep 29;14:1177932220962106. doi: 10.1177/1177932220962106 (PMC7545519; doi:10.1177/1177932220962106), 2020-09-29
Supplement: Supplementary_table_S3_xyz4733678337073.pdf [file Supplementary_table_S3_xyz4733678337073.pdf]

| sample ID | Total number of contigs |
|-----------|-------------------------|
|-----------|-------------------------|

|            |    |
|------------|----|
| 10263_7_10 | 86 |
|------------|----|

|            |    |
|------------|----|
| 10263_7_11 | 78 |
|------------|----|

|            |    |
|------------|----|
| 10263_7_12 | 71 |
|------------|----|

|            |    |
|------------|----|
| 10263_7_14 | 67 |
|------------|----|

|            |    |
|------------|----|
| 10263_7_16 | 70 |
|------------|----|

|            |    |
|------------|----|
| 10263_7_23 | 88 |
|------------|----|

10263\_7\_27

78

10263\_7\_2

69

10263\_7\_32

70

10263\_7\_39

70

10263\_7\_3

72

10263\_7\_40 123

10263\_7\_43 62

10263\_7\_44 62

10263\_7\_45 63

10263\_7\_46 58

10263\_7\_47 60

10263\_7\_49 61

10263\_7\_53 79

10263\_7\_5 65

10263\_7\_60 69

10263\_7\_63 77

10263\_7\_64 85

10263\_7\_65 85

10263\_7\_7 80

10395\_8\_13 66

10395\_8\_15 73

10395\_8\_17 69

10395\_8\_18 70

10395\_8\_19 74

10395\_8\_1 51

10395\_8\_20 65

10395\_8\_21 57

|            |    |
|------------|----|
| 10395_8_21 | 57 |
| 10395_8_22 | 71 |
| 10395_8_24 | 68 |
| 10395_8_25 | 80 |
| 10395_8_26 | 72 |
| 10395_8_28 | 92 |

10395\_8\_29 75

10395\_8\_30 74

10395\_8\_31 80

10395\_8\_33 66

10395\_8\_34 81

10395\_8\_35 73

10395\_8\_36 75

10395\_8\_37 63

10395\_8\_38 60

10395\_8\_41 58

10395\_8\_42 66

10395\_8\_48 65

10395\_8\_50 70

10395\_8\_51 64

10395\_8\_52 66



10395\_8\_54 70

10395\_8\_55 68

10395\_8\_56 66

10395\_8\_57 61

10395\_8\_58 66

10395\_8\_61 76

10395\_8\_62 85

10395\_8\_66 77

10395\_8\_67 74

10395\_8\_68 76

10395\_8\_6 64

10395\_8\_8 78

10395\_8\_9 79



## Number\_Unmapped\_contigs

9

7

8

7

8

3

10

10

8

6

7

15

4

6

2

3

7

5

4

8

7

6

7

11

6

2

6

7

6

5

9

4

1



4

7

8

10

6

11

5

5

6

4

10

7

8

7

3

3

5

5

8

6

5

7

4

6

5

4

3

6

8

10

5

8

6

9



## Unmapped\_Contig\_ID

ERS242981|SC|contig000078  
ERS242981|SC|contig000080  
ERS242981|SC|contig000081  
ERS242981|SC|contig000082  
ERS242981|SC|contig000083  
ERS242981|SC|contig000084  
ERS242981|SC|contig000085  
ERS242981|SC|contig000086  
ERS242982|SC|contig000072  
ERS242982|SC|contig000073  
ERS242982|SC|contig000074  
ERS242982|SC|contig000075  
ERS242982|SC|contig000076  
ERS242982|SC|contig000077  
ERS242982|SC|contig000078  
ERS242983|SC|contig000064  
ERS242983|SC|contig000065  
ERS242983|SC|contig000066  
ERS242983|SC|contig000067  
ERS242983|SC|contig000068  
ERS242983|SC|contig000069  
ERS242983|SC|contig000070  
ERS242983|SC|contig000071  
ERS242985|SC|contig000056  
ERS242985|SC|contig000062  
ERS242985|SC|contig000063  
ERS242985|SC|contig000064  
ERS242985|SC|contig000065  
ERS242985|SC|contig000066  
ERS242985|SC|contig000067  
ERS242987|SC|contig000057  
ERS242987|SC|contig000061  
ERS242987|SC|contig000065  
ERS242987|SC|contig000066  
ERS242987|SC|contig000067  
ERS242987|SC|contig000068  
ERS242987|SC|contig000069  
ERS242987|SC|contig000070  
ERS242994|SC|contig000067  
ERS242994|SC|contig000068  
ERS242994|SC|contig000069  
ERS242998|SC|contig000079

ERS242998|SC|contig000080  
ERS242998|SC|contig000081  
ERS242998|SC|contig000082  
ERS242998|SC|contig000083  
ERS242998|SC|contig000084  
ERS242998|SC|contig000085  
ERS242998|SC|contig000086  
ERS242998|SC|contig000087  
ERS242998|SC|contig000088  
ERS242973|SC|contig000069  
ERS242973|SC|contig000070  
ERS242973|SC|contig000071  
ERS242973|SC|contig000072  
ERS242973|SC|contig000073  
ERS242973|SC|contig000074  
ERS242973|SC|contig000075  
ERS242973|SC|contig000076  
ERS242973|SC|contig000077  
ERS242973|SC|contig000078  
ERS243003|SC|contig000063  
ERS243003|SC|contig000066  
ERS243003|SC|contig000067  
ERS243003|SC|contig000068  
ERS243003|SC|contig000069  
ERS243003|SC|contig000070  
ERS243003|SC|contig000071  
ERS243003|SC|contig000072  
ERS243010|SC|contig000065  
ERS243010|SC|contig000066  
ERS243010|SC|contig000067  
ERS243010|SC|contig000068  
ERS243010|SC|contig000069  
ERS243010|SC|contig000070  
ERS242974|SC|contig000064  
ERS242974|SC|contig000065  
ERS242974|SC|contig000066  
ERS242974|SC|contig000067  
ERS242974|SC|contig000068  
ERS242974|SC|contig000069  
ERS242974|SC|contig000070  
ERS243011|SC|contig000108  
ERS243011|SC|contig000109  
ERS243011|SC|contig000111



ERS243011|SC|contig000112  
ERS243011|SC|contig000113  
ERS243011|SC|contig000114  
ERS243011|SC|contig000115  
ERS243011|SC|contig000116  
ERS243011|SC|contig000117  
ERS243011|SC|contig000118  
ERS243011|SC|contig000119  
ERS243011|SC|contig000120  
ERS243011|SC|contig000121  
ERS243011|SC|contig000122  
ERS243011|SC|contig000123  
ERS243014|SC|contig000057  
ERS243014|SC|contig000060  
ERS243014|SC|contig000061  
ERS243014|SC|contig000062  
ERS243015|SC|contig000057  
ERS243015|SC|contig000058  
ERS243015|SC|contig000059  
ERS243015|SC|contig000060  
ERS243015|SC|contig000061  
ERS243015|SC|contig000062  
ERS243016|SC|contig000062  
ERS243016|SC|contig000063  
ERS243017|SC|contig000056  
ERS243017|SC|contig000057  
ERS243017|SC|contig000058  
ERS243018|SC|contig000052  
ERS243018|SC|contig000055  
ERS243018|SC|contig000056  
ERS243018|SC|contig000057  
ERS243018|SC|contig000058  
ERS243018|SC|contig000059  
ERS243018|SC|contig000060  
ERS243020|SC|contig000052  
ERS243020|SC|contig000058  
ERS243020|SC|contig000059  
ERS243020|SC|contig000060  
ERS243020|SC|contig000061  
ERS243024|SC|contig000057  
ERS243024|SC|contig000062  
ERS243024|SC|contig000064  
ERS243024|SC|contig000065

ERS242976|SC|contig000072  
ERS242976|SC|contig000073  
ERS242976|SC|contig000074  
ERS242976|SC|contig000075  
ERS242976|SC|contig000076  
ERS242976|SC|contig000077  
ERS242976|SC|contig000078  
ERS242976|SC|contig000079  
ERS243031|SC|contig000060  
ERS243031|SC|contig000064  
ERS243031|SC|contig000065  
ERS243031|SC|contig000066  
ERS243031|SC|contig000067  
ERS243031|SC|contig000068  
ERS243031|SC|contig000069  
ERS243034|SC|contig000072  
ERS243034|SC|contig000073  
ERS243034|SC|contig000074  
ERS243034|SC|contig000075  
ERS243034|SC|contig000076  
ERS243034|SC|contig000077  
ERS243035|SC|contig000079  
ERS243035|SC|contig000080  
ERS243035|SC|contig000081  
ERS243035|SC|contig000082  
ERS243035|SC|contig000083  
ERS243035|SC|contig000084  
ERS243035|SC|contig000085  
ERS243036|SC|contig000073  
ERS243036|SC|contig000075  
ERS243036|SC|contig000077  
ERS243036|SC|contig000078  
ERS243036|SC|contig000079  
ERS243036|SC|contig000080  
ERS243036|SC|contig000081  
ERS243036|SC|contig000082  
ERS243036|SC|contig000083  
ERS243036|SC|contig000084  
ERS243036|SC|contig000085  
ERS242978|SC|contig000075  
ERS242978|SC|contig000076  
ERS242978|SC|contig000077  
ERS242978|SC|contig000078

ERS242978|SC|contig000079  
ERS242978|SC|contig000080  
ERS242984|SC|contig000050  
ERS242984|SC|contig000051  
ERS242986|SC|contig000054  
ERS242986|SC|contig000062  
ERS242986|SC|contig000063  
ERS242986|SC|contig000064  
ERS242986|SC|contig000065  
ERS242986|SC|contig000066  
ERS242988|SC|contig000065  
ERS242988|SC|contig000068  
ERS242988|SC|contig000069  
ERS242988|SC|contig000070  
ERS242988|SC|contig000071  
ERS242988|SC|contig000072  
ERS242988|SC|contig000073  
ERS242989|SC|contig000064  
ERS242989|SC|contig000065  
ERS242989|SC|contig000066  
ERS242989|SC|contig000067  
ERS242989|SC|contig000068  
ERS242989|SC|contig000069  
ERS242990|SC|contig000061  
ERS242990|SC|contig000067  
ERS242990|SC|contig000068  
ERS242990|SC|contig000069  
ERS242990|SC|contig000070  
ERS242972|SC|contig000066  
ERS242972|SC|contig000067  
ERS242972|SC|contig000068  
ERS242972|SC|contig000069  
ERS242972|SC|contig000070  
ERS242972|SC|contig000071  
ERS242972|SC|contig000072  
ERS242972|SC|contig000073  
ERS242972|SC|contig000074  
ERS242991|SC|contig000060  
ERS242991|SC|contig000063  
ERS242991|SC|contig000064  
ERS242991|SC|contig000065  
ERS242992|SC|contig000054  
ERS242992|SC|contig000055

ERS242992|SC|contig000056  
ERS242992|SC|contig000057  
ERS242993|SC|contig000065  
ERS242993|SC|contig000066  
ERS242993|SC|contig000067  
ERS242993|SC|contig000068  
ERS242993|SC|contig000069  
ERS242993|SC|contig000070  
ERS242993|SC|contig000071  
ERS242995|SC|contig000054  
ERS242995|SC|contig000062  
ERS242995|SC|contig000063  
ERS242995|SC|contig000064  
ERS242995|SC|contig000065  
ERS242995|SC|contig000066  
ERS242995|SC|contig000067  
ERS242995|SC|contig000068  
ERS242996|SC|contig000066  
ERS242996|SC|contig000072  
ERS242996|SC|contig000073  
ERS242996|SC|contig000074  
ERS242996|SC|contig000075  
ERS242996|SC|contig000076  
ERS242996|SC|contig000077  
ERS242996|SC|contig000078  
ERS242996|SC|contig000079  
ERS242996|SC|contig000080  
ERS242997|SC|contig000061  
ERS242997|SC|contig000066  
ERS242997|SC|contig000069  
ERS242997|SC|contig000070  
ERS242997|SC|contig000071  
ERS242997|SC|contig000072  
ERS242999|SC|contig000077  
ERS242999|SC|contig000083  
ERS242999|SC|contig000084  
ERS242999|SC|contig000085  
ERS242999|SC|contig000086  
ERS242999|SC|contig000087  
ERS242999|SC|contig000088  
ERS242999|SC|contig000089  
ERS242999|SC|contig000090  
ERS242999|SC|contig000091

ERS242999|SC|contig000092  
ERS243000|SC|contig000071  
ERS243000|SC|contig000072  
ERS243000|SC|contig000073  
ERS243000|SC|contig000074  
ERS243000|SC|contig000075  
ERS243001|SC|contig000067  
ERS243001|SC|contig000071  
ERS243001|SC|contig000072  
ERS243001|SC|contig000073  
ERS243001|SC|contig000074  
ERS243002|SC|contig000074  
ERS243002|SC|contig000076  
ERS243002|SC|contig000077  
ERS243002|SC|contig000078  
ERS243002|SC|contig000079  
ERS243002|SC|contig000080  
ERS243004|SC|contig000063  
ERS243004|SC|contig000064  
ERS243004|SC|contig000065  
ERS243004|SC|contig000066  
ERS243005|SC|contig000069  
ERS243005|SC|contig000071  
ERS243005|SC|contig000073  
ERS243005|SC|contig000075  
ERS243005|SC|contig000076  
ERS243005|SC|contig000077  
ERS243005|SC|contig000078  
ERS243005|SC|contig000079  
ERS243005|SC|contig000080  
ERS243005|SC|contig000081  
ERS243006|SC|contig000067  
ERS243006|SC|contig000068  
ERS243006|SC|contig000069  
ERS243006|SC|contig000070  
ERS243006|SC|contig000071  
ERS243006|SC|contig000072  
ERS243006|SC|contig000073  
ERS243007|SC|contig000065  
ERS243007|SC|contig000067  
ERS243007|SC|contig000070  
ERS243007|SC|contig000071  
ERS243007|SC|contig000072

ERS243007|SC|contig000073  
ERS243007|SC|contig000074  
ERS243007|SC|contig000075  
ERS243008|SC|contig000057  
ERS243008|SC|contig000058  
ERS243008|SC|contig000059  
ERS243008|SC|contig000060  
ERS243008|SC|contig000061  
ERS243008|SC|contig000062  
ERS243008|SC|contig000063  
ERS243009|SC|contig000058  
ERS243009|SC|contig000059  
ERS243009|SC|contig000060  
ERS243012|SC|contig000056  
ERS243012|SC|contig000057  
ERS243012|SC|contig000058  
ERS243013|SC|contig000062  
ERS243013|SC|contig000063  
ERS243013|SC|contig000064  
ERS243013|SC|contig000065  
ERS243013|SC|contig000066  
ERS243019|SC|contig000061  
ERS243019|SC|contig000062  
ERS243019|SC|contig000063  
ERS243019|SC|contig000064  
ERS243019|SC|contig000065  
ERS243021|SC|contig000058  
ERS243021|SC|contig000060  
ERS243021|SC|contig000065  
ERS243021|SC|contig000066  
ERS243021|SC|contig000067  
ERS243021|SC|contig000068  
ERS243021|SC|contig000069  
ERS243021|SC|contig000070  
ERS243022|SC|contig000059  
ERS243022|SC|contig000060  
ERS243022|SC|contig000061  
ERS243022|SC|contig000062  
ERS243022|SC|contig000063  
ERS243022|SC|contig000064  
ERS243023|SC|contig000060  
ERS243023|SC|contig000063  
ERS243023|SC|contig000064

ERS243023|SC|contig000065  
ERS243023|SC|contig000066  
ERS243025|SC|contig000063  
ERS243025|SC|contig000065  
ERS243025|SC|contig000066  
ERS243025|SC|contig000067  
ERS243025|SC|contig000068  
ERS243025|SC|contig000069  
ERS243025|SC|contig000070  
ERS243026|SC|contig000065  
ERS243026|SC|contig000066  
ERS243026|SC|contig000067  
ERS243026|SC|contig000068  
ERS243027|SC|contig000060  
ERS243027|SC|contig000062  
ERS243027|SC|contig000063  
ERS243027|SC|contig000064  
ERS243027|SC|contig000065  
ERS243027|SC|contig000066  
ERS243028|SC|contig000057  
ERS243028|SC|contig000058  
ERS243028|SC|contig000059  
ERS243028|SC|contig000060  
ERS243028|SC|contig000061  
ERS243029|SC|contig000063  
ERS243029|SC|contig000064  
ERS243029|SC|contig000065  
ERS243029|SC|contig000066  
ERS243032|SC|contig000062  
ERS243032|SC|contig000063  
ERS243032|SC|contig000064  
ERS243033|SC|contig000071  
ERS243033|SC|contig000072  
ERS243033|SC|contig000073  
ERS243033|SC|contig000074  
ERS243033|SC|contig000075  
ERS243033|SC|contig000076  
ERS243037|SC|contig000078  
ERS243037|SC|contig000079  
ERS243037|SC|contig000080  
ERS243037|SC|contig000081  
ERS243037|SC|contig000082  
ERS243037|SC|contig000083

ERS243037|SC|contig000084  
ERS243037|SC|contig000085  
ERS243038|SC|contig000068  
ERS243038|SC|contig000069  
ERS243038|SC|contig000070  
ERS243038|SC|contig000071  
ERS243038|SC|contig000072  
ERS243038|SC|contig000073  
ERS243038|SC|contig000074  
ERS243038|SC|contig000075  
ERS243038|SC|contig000076  
ERS243038|SC|contig000077  
ERS243039|SC|contig000070  
ERS243039|SC|contig000071  
ERS243039|SC|contig000072  
ERS243039|SC|contig000073  
ERS243039|SC|contig000074  
ERS242977|SC|contig000069  
ERS242977|SC|contig000070  
ERS242977|SC|contig000071  
ERS242977|SC|contig000072  
ERS242977|SC|contig000073  
ERS242977|SC|contig000074  
ERS242977|SC|contig000075  
ERS242977|SC|contig000076  
ERS242979|SC|contig000068  
ERS242979|SC|contig000074  
ERS242979|SC|contig000075  
ERS242979|SC|contig000076  
ERS242979|SC|contig000077  
ERS242979|SC|contig000078  
ERS242980|SC|contig000071  
ERS242980|SC|contig000072  
ERS242980|SC|contig000073  
ERS242980|SC|contig000074  
ERS242980|SC|contig000075  
ERS242980|SC|contig000076  
ERS242980|SC|contig000077  
ERS242980|SC|contig000078  
ERS242980|SC|contig000079  
ERS242975|SC|contig000079  
ERS242975|SC|contig000080  
ERS242975|SC|contig000081



ERS242975|SC|contig000082  
ERS242975|SC|contig000083  
ERS242975|SC|contig000084  
ERS242975|SC|contig000085  
ERS242975|SC|contig000086  
ERS242975|SC|contig000087  
ERS242975|SC|contig000088

## Length of unmapped contigs

1427

865

771

687

672

574

447

429

1046

528

505

501

488

456

361

1190

982

742

818

810

727

571

440

5412

809

753

679

602

451

435

5128

2497

1157

824

754

680

449

443

974

741

439

1175

1084  
827  
735  
679  
602  
528  
502  
488  
449  
930  
872  
820  
771  
625  
528  
495  
440  
439  
350  
2376  
872  
812  
613  
451  
408  
361  
350  
1164  
809  
739  
637  
630  
451  
1084  
812  
739  
704  
524  
458  
348  
1195  
1175  
1112

944  
783  
755  
708  
652  
568  
546  
484  
441  
405  
347  
336  
2496  
872  
806  
680  
1164  
809  
733  
638  
557  
428  
872  
654  
807  
460  
445  
2441  
1084  
872  
808  
733  
678  
382  
5417  
1163  
872  
816  
436  
3683  
1168  
601  
437

1039  
984  
872  
577  
461  
460  
412  
334  
2417  
1077  
882  
872  
811  
459  
380  
816  
524  
449  
410  
371  
354  
872  
888  
723  
811  
773  
462  
447  
1676  
1459  
872  
794  
690  
598  
528  
508  
502  
443  
316  
1037  
749  
691  
524

502  
492  
810  
748  
5423  
1169  
1073  
861  
808  
319  
1710  
895  
739  
517  
499  
451  
386  
1154  
728  
811  
530  
452  
361  
5055  
1154  
737  
396  
395  
1084  
1073  
1040  
872  
704  
528  
486  
455  
361  
3152  
812  
540  
449  
804  
636

533  
308  
802  
796  
737  
676  
549  
449  
447  
5418  
799  
673  
642  
449  
437  
361  
319  
2511  
872  
729  
804  
681  
450  
449  
377  
361  
319  
3548  
2138  
969  
802  
730  
448  
1622  
946  
1026  
1001  
739  
807  
579  
558  
554  
461

359  
835  
704  
676  
422  
361  
3186  
805  
602  
481  
471  
1238  
872  
971  
803  
704  
337  
1084  
872  
794  
547  
1515  
1439  
1140  
870  
808  
547  
469  
468  
449  
397  
958  
619  
499  
449  
410  
351  
335  
2620  
1668  
832  
723  
704



604  
602  
361  
872  
816  
740  
532  
440  
407  
353  
1135  
729  
361  
739  
608  
437  
872  
819  
729  
531  
449  
1143  
1084  
806  
728  
446  
3962  
2471  
1150  
872  
742  
679  
454  
431  
1173  
978  
740  
587  
397  
397  
2499  
1164  
872

727  
355  
1416  
1158  
872  
804  
345  
333  
305  
872  
806  
737  
604  
1495  
1194  
961  
872  
735  
449  
1084  
813  
729  
602  
553  
872  
735  
357  
339  
804  
423  
317  
833  
807  
776  
722  
579  
329  
998  
1077  
776  
714  
688  
606

476  
338  
1076  
734  
809  
720  
602  
522  
502  
461  
353  
326  
926  
704  
690  
525  
399  
818  
729  
761  
747  
702  
592  
514  
456  
4238  
631  
528  
450  
408  
316  
827  
729  
704  
687  
602  
575  
532  
524  
504  
872  
811  
776

704  
689  
613  
593  
423  
324  
319

**final genome size**

2071918

2079584

2079476

2081613

2079192

2087191

2077359

2078766

2080703

2086131

2082554

2054018

2089517

2089158

2091306

2088192

2086481

2085790

2088049

2081726

2085066

2080894

2075316

2073368

2076247



2094919

2083169

2080122

2083277

2078979

2075682

2084196

2090711

2090711

2084366

2082305

2073856

2076326

2069000

2084698

2078253

2077861

2090520

2075982

2080183

2075033

2088798

2088798

2092047

2089014

2089182

2080115

2090414

2086813

2089773

2091663

2085932

2090108

2091606

2091345

2076691

2072085

2076770

2079367

2075803

2075216

2078005

2071720

## Gaps per genome

171

157

138

141

133

149



184

152

145

138

152

236

127

127

134

119

115

131

134

169

143

169

171

169

174

115

137

149

141

148

144

133

121

144

141

143

152

146

180

154

157

171

146

156

142

149

128

126

118

128

132

140

142

131

144

147

141

121

139

135

157

174



156

154

161

161

158
