# Supplementary material for: Genomic Characteristics of Invasive Streptococcus pneumoniae Serotype 1 in New Caledonia Prior to the Introduction of PCV13
Source: PubMed Central journal article supplement — Bioinform Biol Insights. 2020 Sep 29;14:1177932220962106. doi: 10.1177/1177932220962106 (PMC7545519; doi:10.1177/1177932220962106), 2020-09-29
Supplement: Supplementary_table_S4_xyz47336c16c8561.pdf [file Supplementary_table_S4_xyz47336c16c8561.pdf]

| Gene   | Annotation                                                       |
|--------|------------------------------------------------------------------|
| accA   | Acetyl-coenzyme A carboxylase carboxyl transferase subunit alpha |
| accB   | Biotin carboxyl carrier protein of acetyl-CoA carboxylase        |
| accC   | Biotin carboxylase                                               |
| accD   | Acetyl-coenzyme A carboxylase carboxyl transferase subunit beta  |
| ackA   | Acetate kinase                                                   |
| acoA   | Acetoin:26-dichlorophenolindophenol oxidoreductase subunit alpha |
| acpA_1 | Acyl carrier protein                                             |
| acpA_2 | Capsule synthesis positive regulator AcpA                        |
| acpB   | Capsule synthesis positive regulator AcpB                        |
| acpP   | Acyl carrier protein                                             |
| acpS   | Holo-[acyl-carrier-protein] synthase                             |
| acyP   | Acylphosphatase                                                  |
| adcR   | Transcriptional regulator AdcR                                   |
| addA   | ATP-dependent helicase/nuclease subunit A                        |
| adh_1  | Alcohol dehydrogenase                                            |
| adh_2  | Alcohol dehydrogenase                                            |
| adhA   | Alcohol dehydrogenase 1                                          |
| adhB   | Alcohol dehydrogenase 2                                          |
| adhE   | Aldehyde-alcohol dehydrogenase                                   |
| adhR   | HTH-type transcriptional regulator AdhR                          |
| adk    | Adenylate kinase                                                 |
| agaC   | N-acetylgalactosamine permease IIC component 1                   |
| agaS   | Putative tagatose-6-phosphate ketose/aldose isomerase            |
| agaSK  | Bifunctional alpha-galactosidase/sucrose kinase AgaSK            |
| agrA_1 | Accessory gene regulator A                                       |
| agrA_2 | Accessory gene regulator A                                       |
| aguA   | Agmatine deiminase                                               |
| alaA   | Glutamate-pyruvate aminotransferase AlaA                         |
| alaS   | Alanine--tRNA ligase                                             |
| albF   | Putative zinc protease AlbF                                      |

|        |                                                                |
|--------|----------------------------------------------------------------|
| ald_1  | Alanine dehydrogenase                                          |
| ald_2  | Alanine dehydrogenase                                          |
| aldC   | Alpha-acetolactate decarboxylase                               |
| alr    | Alanine racemase                                               |
| alsT   | Amino-acid carrier protein AlsT                                |
| amiA   | Oligopeptide-binding protein AmiA                              |
| amyS   | Alpha-amylase                                                  |
| amyX   | Pullulanase                                                    |
| ansB   | L-asparaginase 2                                               |
| apbE   | FAD:protein FMN transferase                                    |
| apt    | Adenine phosphoribosyltransferase                              |
| aqpZ2  | Aquaporin Z 2                                                  |
| araD   | L-ribulose-5-phosphate 4-epimerase AraD                        |
| araQ_1 | L-arabinose transport system permease protein AraQ             |
| araQ_2 | L-arabinose transport system permease protein AraQ             |
| araQ_3 | L-arabinose transport system permease protein AraQ             |
| araQ_4 | L-arabinose transport system permease protein AraQ             |
| araQ_5 | L-arabinose transport system permease protein AraQ             |
| arcA   | Arginine deiminase                                             |
| arcB   | Ornithine carbamoyltransferase catabolic                       |
| arcC1  | Carbamate kinase 1                                             |
| argR_1 | Arginine regulator                                             |
| argR_3 | Arginine regulator                                             |
| argS   | Arginine--tRNA ligase                                          |
| arlR_1 | Response regulator ArlR                                        |
| arlR_2 | Response regulator ArlR                                        |
| arlS   | Signal transduction histidine-protein kinase ArlS              |
| arnB   | UDP-4-amino-4-deoxy-L-arabinose--oxoglutarate aminotransferase |
| aroA   | 3-phosphoshikimate 1-carboxyvinyltransferase                   |
| aroB   | 3-dehydroquinate synthase                                      |
| aroC   | Chorismate synthase                                            |

|           |                                                           |
|-----------|-----------------------------------------------------------|
| aroD      | 3-dehydroquinate dehydratase                              |
| aroE      | Shikimate dehydrogenase (NADP(+))                         |
| aroF      | Phospho-2-dehydro-3-deoxyheptonate aldolase Tyr-sensitive |
| aroG      | Phospho-2-dehydro-3-deoxyheptonate aldolase Phe-sensitive |
| aroL      | Shikimate kinase 2                                        |
| artM      | Arginine transport ATP-binding protein ArtM               |
| artP      | Arginine-binding extracellular protein ArtP               |
| artQ      | Arginine transport system permease protein ArtQ           |
| asd       | Aspartate-semialdehyde dehydrogenase                      |
| asnA      | Aspartate--ammonia ligase                                 |
| asnS      | Asparagine--tRNA ligase                                   |
| asp2      | Accessory Sec system protein Asp2                         |
| asp3      | Accessory Sec system protein Asp3                         |
| aspS      | Aspartate--tRNA ligase                                    |
| atpA      | ATP synthase subunit alpha                                |
| atpB      | ATP synthase subunit a                                    |
| atpC      | ATP synthase epsilon chain                                |
| atpD      | ATP synthase subunit beta                                 |
| atpE_1    | V-type proton ATPase subunit E                            |
| atpE_2    | ATP synthase subunit c                                    |
| atpF      | ATP synthase subunit b                                    |
| atpG      | ATP synthase gamma chain                                  |
| atpH      | ATP synthase subunit delta                                |
| axe1-6A_1 | Carbohydrate acetyl esterase/feruloyl esterase            |
| axe1-6A_2 | Carbohydrate acetyl esterase/feruloyl esterase            |
| axeA      | Cephalosporin-C deacetylase                               |
| bacC      | Dihydroanticapsin 7-dehydrogenase                         |
| bbmA      | Intracellular maltogenic amylase                          |
| bceA      | Bacitracin export ATP-binding protein BceA                |
| bceB      | Bacitracin export permease protein BceB                   |
| bcrC      | Undecaprenyl-diphosphatase BcrC                           |

|        |                                                                        |
|--------|------------------------------------------------------------------------|
| bepA   | Beta-barrel assembly-enhancing protease                                |
| bfmBAB | 2-oxoisovalerate dehydrogenase subunit beta                            |
| bga    | Beta-galactosidase                                                     |
| bglA   | 6-phospho-beta-glucosidase BglA                                        |
| bglF   | PTS system beta-glucoside-specific EIIBCA component                    |
| bglH_1 | Aryl-phospho-beta-D-glucosidase BglH                                   |
| bglH_2 | Aryl-phospho-beta-D-glucosidase BglH                                   |
| bglK_1 | Beta-glucoside kinase                                                  |
| bglK_2 | Beta-glucoside kinase                                                  |
| bglK_3 | Beta-glucoside kinase                                                  |
| bioY2  | Biotin transporter BioY2                                               |
| birA   | Bifunctional ligase/repressor BirA                                     |
| blaSE  | Glutamyl endopeptidase                                                 |
| bmrA   | Multidrug resistance ABC transporter ATP-binding/permease protein BmrA |
| braC   | Leucine- isoleucine- valine- threonine- and alanine-binding protein    |
| brnQ   | Branched-chain amino acid transport system 2 carrier protein           |
| brpA   | Biofilm regulatory protein A                                           |
| bsaA   | Glutathione peroxidase BsaA                                            |
| bshA   | N-acetyl-alpha-D-glucosaminyl L-malate synthase                        |
| btrD   | 2'-N-acetylparomamine deacetylase                                      |
| capA   | Capsule biosynthesis protein CapA                                      |
| carA   | Carbamoyl-phosphate synthase small chain                               |
| carB   | Carbamoyl-phosphate synthase large chain                               |
| catE   | Catechol-2,3-dioxygenase                                               |
| cbbZC  | Phosphoglycolate phosphatase chromosomal                               |
| cca    | CCA-adding enzyme                                                      |
| ccpA_1 | Catabolite control protein A                                           |
| ccpA_2 | Catabolite control protein A                                           |
| cdaA   | Cyclic di-AMP synthase CdaA                                            |
| cdaR   | CdaA regulatory protein CdaR                                           |
| cdd_1  | Cytidine deaminase                                                     |

|         |                                                                   |
|---------|-------------------------------------------------------------------|
| cdd_2   | Cytidine deaminase                                                |
| cdhR    | HTH-type transcriptional regulator CdhR                           |
| cdsA    | Phosphatidate cytidyltransferase                                  |
| celA_1  | PTS system cellobiose-specific EIIB component                     |
| celA_2  | PTS system cellobiose-specific EIIB component                     |
| celA_3  | PTS system cellobiose-specific EIIB component                     |
| celD    | PTS system cellobiose-specific EIIA component                     |
| chrR    | Chromate reductase                                                |
| cinA    | Putative competence-damage inducible protein                      |
| clcA    | H(+)/Cl(-) exchange transporter ClcA                              |
| clpC_1  | putative ATP-dependent Clp protease ATP-binding subunit           |
| clpC_2  | ATP-dependent Clp protease ATP-binding subunit ClpC               |
| clpE    | ATP-dependent Clp protease ATP-binding subunit ClpE               |
| clpP    | ATP-dependent Clp protease proteolytic subunit                    |
| clpX    | ATP-dependent Clp protease ATP-binding subunit ClpX               |
| cls     | Cardiolipin synthase                                              |
| cmk     | Cytidylate kinase                                                 |
| cmpD    | Bicarbonate transport ATP-binding protein CmpD                    |
| cmtB    | Mannitol-specific cryptic phosphotransferase enzyme IIA component |
| coaA    | Pantothenate kinase                                               |
| coaBC_1 | Coenzyme A biosynthesis bifunctional protein CoaBC                |
| coaBC_2 | Coenzyme A biosynthesis bifunctional protein CoaBC                |
| coaD    | Phosphopantetheine adenylyltransferase                            |
| coaE    | Dephospho-CoA kinase                                              |
| cobQ    | Cobyric acid synthase                                             |
| codY    | GTP-sensing transcriptional pleiotropic repressor CodY            |
| coiA    | Competence protein CoiA                                           |
| comC    | Type 4 prepilin-like proteins leader peptide-processing enzyme    |
| comC1   | Competence-stimulating peptide type 1                             |
| comEA   | ComE operon protein 1                                             |
| comEC   | ComE operon protein 3                                             |

|        |                                                              |
|--------|--------------------------------------------------------------|
| comFA  | ComF operon protein 1                                        |
| comGA  | ComG operon protein 1                                        |
| copY   | Transcriptional repressor CopY                               |
| corA   | Magnesium transport protein CorA                             |
| corC   | Magnesium and cobalt efflux protein CorC                     |
| cpoA   | Alpha-galactosylglucosyldiacylglycerol synthase              |
| cpsB   | Tyrosine-protein phosphatase CpsB                            |
| cpsD   | Tyrosine-protein kinase CpsD                                 |
| crcB_1 | Putative fluoride ion transporter CrcB                       |
| crcB_2 | Putative fluoride ion transporter CrcB                       |
| csbB   | Putative glycosyltransferase CsbB                            |
| cshA   | ATP-dependent RNA helicase CshA                              |
| cshB   | DEAD-box ATP-dependent RNA helicase CshB                     |
| ctpC   | putative manganese/zinc-exporting P-type ATPase              |
| ctpE   | putative cation-transporting ATPase E                        |
| ctsR   | Transcriptional regulator CtsR                               |
| cugP   | UTP--glucose-1-phosphate uridylyltransferase                 |
| cutC   | Choline trimethylamine-lyase                                 |
| cvfB   | Conserved virulence factor B                                 |
| cysA   | Sulfate/thiosulfate import ATP-binding protein CysA          |
| cysB   | HTH-type transcriptional regulator CysB                      |
| cysE   | Serine acetyltransferase                                     |
| cysK   | Cysteine synthase                                            |
| cysS   | Cysteine--tRNA ligase                                        |
| czcD   | Cadmium cobalt and zinc/H(+)-K(+) antiporter                 |
| dacA   | D-alanyl-D-alanine carboxypeptidase DacA                     |
| dapA   | 4-hydroxy-tetrahydrodipicolinate synthase                    |
| dapB   | 4-hydroxy-tetrahydrodipicolinate reductase                   |
| dapE   | Succinyl-diaminopimelate desuccinylase                       |
| dapH   | 2345-tetrahydropyridine-26-dicarboxylate N-acetyltransferase |
| dasR   | HTH-type transcriptional repressor DasR                      |

|        |                                                                       |
|--------|-----------------------------------------------------------------------|
| ddl    | D-alanine--D-alanine ligase                                           |
| def_1  | Peptide deformylase                                                   |
| def_2  | Peptide deformylase                                                   |
| degA_1 | HTH-type transcriptional regulator DegA                               |
| degA_2 | HTH-type transcriptional regulator DegA                               |
| deoB   | Phosphopentomutase                                                    |
| deoC   | Deoxyribose-phosphate aldolase                                        |
| deoD_1 | Purine nucleoside phosphorylase DeoD-type                             |
| deoD_2 | Purine nucleoside phosphorylase DeoD-type                             |
| der_1  | GTPase Der                                                            |
| der_2  | GTPase Der                                                            |
| desK   | Sensor histidine kinase DesK                                          |
| desR   | Transcriptional regulatory protein DesR                               |
| dexB   | Glucan 16-alpha-glucosidase                                           |
| dgkA   | Undecaprenol kinase                                                   |
| dhaM   | PTS-dependent dihydroxyacetone kinase phosphotransferase subunit DhaM |
| dhfR   | Dihydrofolate reductase                                               |
| dinB   | DNA polymerase IV                                                     |
| dinG   | putative ATP-dependent helicase DinG                                  |
| divIB  | Cell division protein DivIB                                           |
| divIVA | Cell division protein DivIVA                                          |
| dltA   | D-alanine--poly(phosphoribitol) ligase subunit 1                      |
| dltC   | D-alanine--poly(phosphoribitol) ligase subunit 2                      |
| dnaA   | Chromosomal replication initiator protein DnaA                        |
| dnaC   | Replicative DNA helicase                                              |
| dnaD_1 | DNA replication protein DnaD                                          |
| dnaD_2 | DNA replication protein DnaD                                          |
| dnaE   | DNA polymerase III subunit alpha                                      |
| dnaG   | DNA primase                                                           |
| dnal   | Primosomal protein Dnal                                               |
| dnaJ   | Chaperone protein DnaJ                                                |

|        |                                                               |
|--------|---------------------------------------------------------------|
| dnaK   | Chaperone protein DnaK                                        |
| dnaN   | DNA polymerase III subunit beta                               |
| dnaX_1 | DNA polymerase III subunit tau                                |
| dnaX_2 | DNA polymerase III subunit gamma/tau                          |
| dpnA   | Modification methylase DpnIIB                                 |
| dpnB   | Type-2 restriction enzyme DpnII                               |
| dpnM   | Modification methylase DpnIIA                                 |
| dprA   | DNA processing protein DprA                                   |
| dps    | DNA protection during starvation protein                      |
| dsbD_1 | Thiol:disulfide interchange protein DsbD                      |
| dsbD_2 | Thiol:disulfide interchange protein DsbD                      |
| dtd    | D-aminoacyl-tRNA deacylase                                    |
| dtxR   | Diphtheria toxin repressor                                    |
| dus    | putative tRNA-dihydrouridine synthase                         |
| dut    | Deoxyuridine 5'-triphosphate nucleotidohydrolase              |
| dxs    | 1-deoxy-D-xylulose-5-phosphate synthase                       |
| ecfA1  | Energy-coupling factor transporter ATP-binding protein EcfA1  |
| ecfA2  | Energy-coupling factor transporter ATP-binding protein EcfA2  |
| ecfT_1 | Energy-coupling factor transporter transmembrane protein EcfT |
| ecfT_2 | Energy-coupling factor transporter transmembrane protein EcfT |
| ecfT_3 | Energy-coupling factor transporter transmembrane protein EcfT |
| ecsA_1 | ABC-type transporter ATP-binding protein EcsA                 |
| ecsA_2 | ABC-type transporter ATP-binding protein EcsA                 |
| efp    | Elongation factor P                                           |
| endA   | DNA-entry nuclease                                            |
| engB   | putative GTP-binding protein EngB                             |
| eno    | Enolase                                                       |
| epiD   | Epidermin decarboxylase                                       |
| epsF   | Putative glycosyltransferase EpsF                             |
| epsH_1 | Putative glycosyltransferase EpsH                             |
| epsH_2 | Putative glycosyltransferase EpsH                             |

|        |                                                            |
|--------|------------------------------------------------------------|
| epsH_3 | Putative glycosyltransferase EpsH                          |
| epsJ_1 | putative glycosyltransferase EpsJ                          |
| epsJ_2 | putative glycosyltransferase EpsJ                          |
| era    | GTPase Era                                                 |
| ethR   | HTH-type transcriptional regulator EthR                    |
| ettA   | Energy-dependent translational throttle protein EttA       |
| exoA   | Exodeoxyribonuclease                                       |
| ezrA   | Septation ring formation regulator EzrA                    |
| fabD   | Malonyl CoA-acyl carrier protein transacylase              |
| fabF   | 3-oxoacyl-[acyl-carrier-protein] synthase 2                |
| fabG   | 3-oxoacyl-[acyl-carrier-protein] reductase FabG            |
| fabH   | 3-oxoacyl-[acyl-carrier-protein] synthase 3                |
| fabM   | Trans-2-decenoyl-[acyl-carrier-protein] isomerase          |
| fabZ   | 3-hydroxyacyl-[acyl-carrier-protein] dehydratase FabZ      |
| fba    | Fructose-bisphosphate aldolase                             |
| fecE   | Fe(3+) dicitrate transport ATP-binding protein FecE        |
| femA   | Aminoacyltransferase FemA                                  |
| femX   | Lipid II:glycine glycytransferase                          |
| fepD_1 | Ferric enterobactin transport system permease protein FepD |
| fepD_2 | Ferric enterobactin transport system permease protein FepD |
| feuB   | Iron-uptake system permease protein FeuB                   |
| ffh    | Signal recognition particle protein                        |
| fhs1   | Formate--tetrahydrofolate ligase 1                         |
| fhuC   | Iron(3+)-hydroxamate import ATP-binding protein FhuC       |
| fieF   | Ferrous-iron efflux pump FieF                              |
| fmt    | Methionyl-tRNA formyltransferase                           |
| fni    | Isopentenyl-diphosphate delta-isomerase                    |
| fold   | Bifunctional protein FoID protein                          |
| folE   | GTP cyclohydrolase 1                                       |
| fpgS_1 | Folypolyglutamate synthase                                 |
| fpgS_2 | Folypolyglutamate synthase                                 |

|        |                                                            |
|--------|------------------------------------------------------------|
| frr    | Ribosome-recycling factor                                  |
| fruA   | PTS system fructose-specific EIIABC component              |
| fsaA   | Fructose-6-phosphate aldolase 1                            |
| ftsA   | Cell division protein FtsA                                 |
| ftsE   | Cell division ATP-binding protein FtsE                     |
| ftsH   | ATP-dependent zinc metalloprotease FtsH                    |
| ftsK   | DNA translocase FtsK                                       |
| ftsL   | Cell division protein FtsL                                 |
| ftsW   | putative peptidoglycan glycosyltransferase FtsW            |
| ftsX   | Cell division protein FtsX                                 |
| ftsY   | Signal recognition particle receptor FtsY                  |
| ftsZ   | Cell division protein FtsZ                                 |
| fucA   | L-fuculose phosphate aldolase                              |
| fucl   | L-fucose isomerase                                         |
| fucU   | L-fucose mutarotase                                        |
| fus    | Elongation factor G                                        |
| gabR   | HTH-type transcriptional regulatory protein GabR           |
| galE   | UDP-glucose 4-epimerase                                    |
| galK_1 | Galactokinase                                              |
| galK_2 | Galactokinase                                              |
| galT   | Galactose-1-phosphate uridylyltransferase                  |
| gap    | Glyceraldehyde-3-phosphate dehydrogenase                   |
| gapN   | NADP-dependent glyceraldehyde-3-phosphate dehydrogenase    |
| gatA_1 | Glutamyl-tRNA(Gln) amidotransferase subunit A              |
| gatB   | Aspartyl/glutamyl-tRNA(Asn/Gln) amidotransferase subunit B |
| gatC_1 | Glutamyl-tRNA(Gln) amidotransferase subunit C              |
| gatC_2 | PTS system galactitol-specific EIIC component              |
| gdh    | NADP-specific glutamate dehydrogenase                      |
| gdpP   | Cyclic-di-AMP phosphodiesterase GdpP                       |
| gla    | Glycerol facilitator-aquaporin gla                         |
| glcA   | Glucan endo-13-beta-glucosidase A1                         |

|        |                                                                |
|--------|----------------------------------------------------------------|
| glcK   | Glucokinase                                                    |
| gldA   | Glycerol dehydrogenase                                         |
| glgA   | Glycogen synthase                                              |
| glgB   | 14-alpha-glucan branching enzyme GlgB                          |
| glgC   | Glucose-1-phosphate adenylyltransferase                        |
| glgD   | Glycogen biosynthesis protein GlgD                             |
| glmM   | Phosphoglucosamine mutase                                      |
| glmS   | Glutamine--fructose-6-phosphate aminotransferase [isomerizing] |
| glmU   | Bifunctional protein GlmU                                      |
| glnA   | Glutamine synthetase                                           |
| glnH_1 | ABC transporter glutamine-binding protein GlnH                 |
| glnH_2 | Glutamine-binding periplasmic protein                          |
| glnM_1 | putative glutamine ABC transporter permease protein GlnM       |
| glnM_2 | putative glutamine ABC transporter permease protein GlnM       |
| glnP_1 | putative glutamine ABC transporter permease protein GlnP       |
| glnP_2 | Glutamine transport system permease protein GlnP               |
| glnQ_1 | Glutamine transport ATP-binding protein GlnQ                   |
| glnQ_2 | Glutamine transport ATP-binding protein GlnQ                   |
| glnQ_3 | Glutamine transport ATP-binding protein GlnQ                   |
| glnQ_4 | Glutamine transport ATP-binding protein GlnQ                   |
| glnQ_5 | Glutamine transport ATP-binding protein GlnQ                   |
| glnR   | HTH-type transcriptional regulator GlnR                        |
| gloA   | Lactoylglutathione lyase                                       |
| glpE_1 | Thiosulfate sulfurtransferase GlpE                             |
| glpE_2 | Thiosulfate sulfurtransferase GlpE                             |
| glpF   | putative glycerol uptake facilitator protein                   |
| glpK   | Glycerol kinase                                                |
| glpO   | Alpha-glycerophosphate oxidase                                 |
| glpQ   | Glycerophosphodiester phosphodiesterase                        |
| gltC   | HTH-type transcriptional regulator GltC                        |
| gltX   | Glutamate--tRNA ligase                                         |

|            |                                                          |
|------------|----------------------------------------------------------|
| gluP       | Rhomboid protease GluP                                   |
| glxK       | Glycerate kinase                                         |
| glyA       | Serine hydroxymethyltransferase                          |
| glyQ       | Glycine--tRNA ligase alpha subunit                       |
| glyS       | Glycine--tRNA ligase beta subunit                        |
| gmK        | Guanylate kinase                                         |
| gmuA       | PTS system oligo-beta-mannoside-specific EIIA component  |
| gmuB       | PTS system oligo-beta-mannoside-specific EIIB component  |
| gmuD_1     | 6-phospho-beta-glucosidase GmuD                          |
| gmuD_2     | 6-phospho-beta-glucosidase GmuD                          |
| gmuE       | Putative fructokinase                                    |
| gmuR       | HTH-type transcriptional regulator GmuR                  |
| gnd        | 6-phosphogluconate dehydrogenase decarboxylating         |
| gno        | Gluconate 5-dehydrogenase                                |
| gor        | Glutathione reductase                                    |
| gph_1      | Phosphoglycolate phosphatase                             |
| gph_2      | Phosphoglycolate phosphatase                             |
| gpmA_1     | 23-bisphosphoglycerate-dependent phosphoglycerate mutase |
| gpmA_2     | 23-bisphosphoglycerate-dependent phosphoglycerate mutase |
| gpsA       | Glycerol-3-phosphate dehydrogenase [NAD(P)+]             |
| gpsB       | Cell cycle protein GpsB                                  |
| graR       | Response regulator protein GraR                          |
| graS       | Sensor histidine kinase GraS                             |
| greA       | Transcription elongation factor GreA                     |
| groL       | 60 kDa chaperonin                                        |
| groS       | 10 kDa chaperonin                                        |
| group_1001 | hypothetical protein                                     |
| group_1004 | hypothetical protein                                     |
| group_1014 | hypothetical protein                                     |
| group_1015 | hypothetical protein                                     |
| group_1016 | hypothetical protein                                     |

group\_1017 hypothetical protein  
group\_1018 hypothetical protein  
group\_1019 hypothetical protein  
group\_1022 hypothetical protein  
group\_1023 hypothetical protein  
group\_1025 hypothetical protein  
group\_1026 hypothetical protein  
group\_1027 hypothetical protein  
group\_1029 hypothetical protein  
group\_103 hypothetical protein  
group\_1031 Putative NrdI-like protein  
group\_1034 hypothetical protein  
group\_1037 hypothetical protein  
group\_1038 hypothetical protein  
group\_1040 hypothetical protein  
group\_1043 Putative two-component membrane permease complex subunit SMU\_746c  
group\_1048 hypothetical protein  
group\_1049 hypothetical protein  
group\_1051 hypothetical protein  
group\_1052 hypothetical protein  
group\_1055 hypothetical protein  
group\_1056 hypothetical protein  
group\_1057 hypothetical protein  
group\_1058 hypothetical protein  
group\_1061 hypothetical protein  
group\_1068 hypothetical protein  
group\_1069 hypothetical protein  
group\_1073 Protein SprT-like protein  
group\_1080 hypothetical protein  
group\_1083 hypothetical protein  
group\_1084 hypothetical protein

group\_1085 Cobalt-dependent inorganic pyrophosphatase  
group\_1086 hypothetical protein  
group\_1091 hypothetical protein  
group\_1092 putative ABC transporter ATP-binding protein  
group\_1093 hypothetical protein  
group\_1095 Flavodoxin  
group\_1101 hypothetical protein  
group\_1102 hypothetical protein  
group\_1104 hypothetical protein  
group\_1105 hypothetical protein  
group\_1106 hypothetical protein  
group\_1115 Putative universal stress protein  
group\_1117 hypothetical protein  
group\_1122 hypothetical protein  
group\_1123 hypothetical protein  
group\_1128 hypothetical protein  
group\_1131 hypothetical protein  
group\_1132 hypothetical protein  
group\_1138 hypothetical protein  
group\_1139 hypothetical protein  
group\_1141 hypothetical protein  
group\_1142 hypothetical protein  
group\_1147 hypothetical protein  
group\_1148 Putative TrmH family tRNA/rRNA methyltransferase  
group\_1150 hypothetical protein  
group\_1151 hypothetical protein  
group\_1154 hypothetical protein  
group\_1159 hypothetical protein  
group\_1161 hypothetical protein  
group\_1162 hypothetical protein  
group\_1165 hypothetical protein

group\_1167 hypothetical protein  
group\_1170 hypothetical protein  
group\_1175 hypothetical protein  
group\_1177 hypothetical protein  
group\_1179 Putative acetyltransferase  
group\_1180 hypothetical protein  
group\_1183 hypothetical protein  
group\_1184 hypothetical protein  
group\_1189 Beta-galactosidase BoGH2A  
group\_1192 hypothetical protein  
group\_1195 hypothetical protein  
group\_1198 hypothetical protein  
group\_1202 hypothetical protein  
group\_1203 hypothetical protein  
group\_1205 hypothetical protein  
group\_1206 hypothetical protein  
group\_1207 hypothetical protein  
group\_1209 putative HTH-type transcriptional regulator  
group\_1211 hypothetical protein  
group\_1214 hypothetical protein  
group\_1217 hypothetical protein  
group\_1218 hypothetical protein  
group\_1219 hypothetical protein  
group\_1220 hypothetical protein  
group\_1222 N-carbamoyl-D-amino acid hydrolase  
group\_1224 hypothetical protein  
group\_1226 hypothetical protein  
group\_1231 hypothetical protein  
group\_1234 hypothetical protein  
group\_1237 hypothetical protein  
group\_1238 hypothetical protein

group\_1246 hypothetical protein  
group\_1248 putative response regulatory protein  
group\_1250 hypothetical protein  
group\_1252 hypothetical protein  
group\_1253 hypothetical protein  
group\_1258 putative transcriptional regulatory protein  
group\_126 hypothetical protein  
group\_1260 Purine nucleoside phosphoramidase  
group\_1263 hypothetical protein  
group\_1265 hypothetical protein  
group\_1266 hypothetical protein  
group\_1272 hypothetical protein  
group\_1275 hypothetical protein  
group\_1279 Putative O-methyltransferase  
group\_1280 hypothetical protein  
group\_1284 hypothetical protein  
group\_1285 hypothetical protein  
group\_1287 hypothetical protein  
group\_1288 hypothetical protein  
group\_1291 hypothetical protein  
group\_1293 hypothetical protein  
group\_1295 hypothetical protein  
group\_1299 hypothetical protein  
group\_1305 hypothetical protein  
group\_1306 hypothetical protein  
group\_1310 hypothetical protein  
group\_1313 hypothetical protein  
group\_1316 hypothetical protein  
group\_1319 Putative NAD(P)H nitroreductase  
group\_1320 hypothetical protein  
group\_1321 hypothetical protein

group\_1323 hypothetical protein  
group\_1328 hypothetical protein  
group\_1331 hypothetical protein  
group\_1332 hypothetical protein  
group\_1338 hypothetical protein  
group\_1340 hypothetical protein  
group\_1341 hypothetical protein  
group\_1343 hypothetical protein  
group\_1345 hypothetical protein  
group\_1347 hypothetical protein  
group\_1348 hypothetical protein  
group\_1350 hypothetical protein  
group\_1354 hypothetical protein  
group\_1356 hypothetical protein  
group\_1357 hypothetical protein  
group\_1358 hypothetical protein  
group\_1365 hypothetical protein  
group\_1384 hypothetical protein  
group\_1391 hypothetical protein  
group\_1392 hypothetical protein  
group\_1393 hypothetical protein  
group\_1395 hypothetical protein  
group\_1398 hypothetical protein  
group\_1400 hypothetical protein  
group\_1404 hypothetical protein  
group\_1413 hypothetical protein  
group\_1414 hypothetical protein  
group\_1416 hypothetical protein  
group\_1417 hypothetical protein  
group\_1420 hypothetical protein  
group\_1422 hypothetical protein

group\_1423 hypothetical protein  
group\_1424 hypothetical protein  
group\_1427 hypothetical protein  
group\_1430 hypothetical protein  
group\_1431 hypothetical protein  
group\_1432 hypothetical protein  
group\_1435 hypothetical protein  
group\_1436 Glycine/sarcosine N-methyltransferase  
group\_1437 hypothetical protein  
group\_1438 Arylsulfatase  
group\_1439 hypothetical protein  
group\_1444 hypothetical protein  
group\_1445 hypothetical protein  
group\_1450 hypothetical protein  
group\_1452 hypothetical protein  
group\_1454 hypothetical protein  
group\_1456 hypothetical protein  
group\_1460 hypothetical protein  
group\_1464 hypothetical protein  
group\_1466 hypothetical protein  
group\_1467 hypothetical protein  
group\_1469 hypothetical protein  
group\_1470 hypothetical protein  
group\_1475 hypothetical protein  
group\_1478 hypothetical protein  
group\_1479 hypothetical protein  
group\_1483 hypothetical protein  
group\_1488 hypothetical protein  
group\_1489 hypothetical protein  
group\_1499 hypothetical protein  
group\_1501 hypothetical protein

group\_1505 hypothetical protein  
group\_1506 hypothetical protein  
group\_1508 hypothetical protein  
group\_1509 hypothetical protein  
group\_1511 Putative two-component membrane permease complex subunit SMU\_747c  
group\_1512 hypothetical protein  
group\_1516 hypothetical protein  
group\_1519 hypothetical protein  
group\_1526 hypothetical protein  
group\_1532 hypothetical protein  
group\_1535 hypothetical protein  
group\_1538 hypothetical protein  
group\_1540 hypothetical protein  
group\_1541 hypothetical protein  
group\_1545 hypothetical protein  
group\_1546 hypothetical protein  
group\_1548 hypothetical protein  
group\_1549 hypothetical protein  
group\_1551 hypothetical protein  
group\_1553 putative sensor-like histidine kinase  
group\_1556 hypothetical protein  
group\_156 hypothetical protein  
group\_1560 hypothetical protein  
group\_1566 hypothetical protein  
group\_1568 hypothetical protein  
group\_1569 hypothetical protein  
group\_1570 hypothetical protein  
group\_1572 hypothetical protein  
group\_1575 hypothetical protein  
group\_1577 hypothetical protein  
group\_1578 hypothetical protein

group\_1581 hypothetical protein  
group\_1582 hypothetical protein  
group\_1585 hypothetical protein  
group\_1586 hypothetical protein  
group\_1588 Phosphomevalonate kinase  
group\_1589 hypothetical protein  
group\_1590 hypothetical protein  
group\_1594 hypothetical protein  
group\_1597 hypothetical protein  
group\_1598 hypothetical protein  
group\_1600 hypothetical protein  
group\_1603 hypothetical protein  
group\_1605 hypothetical protein  
group\_1607 hypothetical protein  
group\_1610 putative AAA domain-containing protein  
group\_1611 hypothetical protein  
group\_1612 hypothetical protein  
group\_1619 hypothetical protein  
group\_1620 hypothetical protein  
group\_1624 hypothetical protein  
group\_1626 hypothetical protein  
group\_1637 hypothetical protein  
group\_1638 hypothetical protein  
group\_1641 hypothetical protein  
group\_1644 Aspartate aminotransferase  
group\_1651 hypothetical protein  
group\_1654 hypothetical protein  
group\_1658 hypothetical protein  
group\_1662 Acetyltransferase  
group\_1667 hypothetical protein  
group\_1669 hypothetical protein

group\_1670 hypothetical protein  
group\_1676 hypothetical protein  
group\_1684 hypothetical protein  
group\_1688 hypothetical protein  
group\_1689 hypothetical protein  
group\_169 hypothetical protein  
group\_1691 hypothetical protein  
group\_1694 hypothetical protein  
group\_1700 hypothetical protein  
group\_1701 hypothetical protein  
group\_1706 hypothetical protein  
group\_1709 putative ABC transporter ATP-binding protein  
group\_1711 hypothetical protein  
group\_1712 Putative phosphatase  
group\_1714 hypothetical protein  
group\_1715 hypothetical protein  
group\_1718 hypothetical protein  
group\_1722 hypothetical protein  
group\_1724 hypothetical protein  
group\_1730 hypothetical protein  
group\_1733 hypothetical protein  
group\_1735 hypothetical protein  
group\_1737 Putative glutamine amidotransferase  
group\_1742 hypothetical protein  
group\_1743 putative ABC transporter ATP-binding protein  
group\_1748 hypothetical protein  
group\_1749 hypothetical protein  
group\_1752 putative ABC transporter ATP-binding protein  
group\_1755 hypothetical protein  
group\_1760 hypothetical protein  
group\_1765 hypothetical protein

group\_1766 hypothetical protein  
group\_1771 hypothetical protein  
group\_1772 hypothetical protein  
group\_1774 hypothetical protein  
group\_1779 hypothetical protein  
group\_1783 hypothetical protein  
group\_1785 hypothetical protein  
group\_1787 hypothetical protein  
group\_1788 hypothetical protein  
group\_1793 hypothetical protein  
group\_1795 hypothetical protein  
group\_1798 Tyrosine recombinase XerD-like protein  
group\_1802 hypothetical protein  
group\_1807 hypothetical protein  
group\_1810 hypothetical protein  
group\_1812 hypothetical protein  
group\_1816 hypothetical protein  
group\_1818 hypothetical protein  
group\_1821 hypothetical protein  
group\_1822 hypothetical protein  
group\_1826 hypothetical protein  
group\_1827 hypothetical protein  
group\_1831 hypothetical protein  
group\_1832 hypothetical protein  
group\_1835 hypothetical protein  
group\_1838 hypothetical protein  
group\_1839 hypothetical protein  
group\_1841 hypothetical protein  
group\_1843 hypothetical protein  
group\_1845 hypothetical protein  
group\_1848 hypothetical protein

group\_1849 hypothetical protein  
group\_1851 hypothetical protein  
group\_1852 hypothetical protein  
group\_1854 hypothetical protein  
group\_1858 Oligosaccharide 4-alpha-D-glucosyltransferase  
group\_186 hypothetical protein  
group\_1861 hypothetical protein  
group\_1865 hypothetical protein  
group\_1871 hypothetical protein  
group\_1878 hypothetical protein  
group\_1879 hypothetical protein  
group\_1883 hypothetical protein  
group\_1886 hypothetical protein  
group\_1887 hypothetical protein  
group\_1888 hypothetical protein  
group\_1889 hypothetical protein  
group\_1890 hypothetical protein  
group\_1893 hypothetical protein  
group\_1897 hypothetical protein  
group\_1898 hypothetical protein  
group\_1900 hypothetical protein  
group\_1901 hypothetical protein  
group\_1904 hypothetical protein  
group\_1905 hypothetical protein  
group\_1908 Putative dipeptidase  
group\_1915 hypothetical protein  
group\_1918 Putative bifunctional phosphatase/peptidyl-prolyl cis-trans isomerase  
group\_1923 hypothetical protein  
group\_1926 hypothetical protein  
group\_1927 hypothetical protein  
group\_1928 hypothetical protein

group\_1932 hypothetical protein  
group\_1934 hypothetical protein  
group\_1938 hypothetical protein  
group\_1943 hypothetical protein  
group\_1945 hypothetical protein  
group\_1946 hypothetical protein  
group\_1947 hypothetical protein  
group\_1950 hypothetical protein  
group\_1951 hypothetical protein  
group\_1953 Hyaluronate lyase  
group\_1956 hypothetical protein  
group\_1957 hypothetical protein  
group\_1963 hypothetical protein  
group\_1968 hypothetical protein  
group\_1971 hypothetical protein  
group\_1974 hypothetical protein  
group\_1976 hypothetical protein  
group\_1978 Alpha-monoglucosyldiacylglycerol synthase  
group\_1980 hypothetical protein  
group\_1981 hypothetical protein  
group\_1984 hypothetical protein  
group\_1987 hypothetical protein  
group\_1988 hypothetical protein  
group\_199 hypothetical protein  
group\_1991 hypothetical protein  
group\_1994 hypothetical protein  
group\_1996 hypothetical protein  
group\_2002 Sugar transporter SemiSWEET  
group\_2003 hypothetical protein  
group\_2004 hypothetical protein  
group\_2008 hypothetical protein

group\_2011 hypothetical protein  
group\_2012 hypothetical protein  
group\_2013 hypothetical protein  
group\_2014 hypothetical protein  
group\_2016 hypothetical protein  
group\_2017 hypothetical protein  
group\_2023 hypothetical protein  
group\_2028 hypothetical protein  
group\_2030 hypothetical protein  
group\_2032 Putative zinc metalloprotease  
group\_2040 hypothetical protein  
group\_2045 hypothetical protein  
group\_2046 hypothetical protein  
group\_2049 hypothetical protein  
group\_2057 hypothetical protein  
group\_2061 hypothetical protein  
group\_2065 hypothetical protein  
group\_2066 hypothetical protein  
group\_2068 hypothetical protein  
group\_2069 hypothetical protein  
group\_2078 hypothetical protein  
group\_2085 hypothetical protein  
group\_209 hypothetical protein  
group\_2090 hypothetical protein  
group\_2091 hypothetical protein  
group\_2093 hypothetical protein  
group\_2094 hypothetical protein  
group\_2098 hypothetical protein  
group\_2099 hypothetical protein  
group\_2101 hypothetical protein  
group\_2102 DegV domain-containing protein

group\_2106 hypothetical protein  
group\_2107 hypothetical protein  
group\_2110 hypothetical protein  
group\_2111 hypothetical protein  
group\_2112 hypothetical protein  
group\_2115 hypothetical protein  
group\_2121 hypothetical protein  
group\_2122 hypothetical protein  
group\_2132 hypothetical protein  
group\_2134 DegV domain-containing protein  
group\_2140 putative ABC transporter ATP-binding protein  
group\_2142 hypothetical protein  
group\_2144 hypothetical protein  
group\_2146 hypothetical protein  
group\_2147 hypothetical protein  
group\_2149 hypothetical protein  
group\_2155 hypothetical protein  
group\_2156 hypothetical protein  
group\_2158 hypothetical protein  
group\_2163 hypothetical protein  
group\_2164 hypothetical protein  
group\_2165 Putative bifunctional phosphatase/peptidyl-prolyl cis-trans isomerase  
group\_217 hypothetical protein  
group\_2171 hypothetical protein  
group\_2179 hypothetical protein  
group\_2181 hypothetical protein  
group\_2188 hypothetical protein  
group\_2189 hypothetical protein  
group\_2190 hypothetical protein  
group\_2192 Calcium-transporting ATPase 1  
group\_2193 hypothetical protein

group\_2194 hypothetical protein  
group\_2201 hypothetical protein  
group\_2203 hypothetical protein  
group\_2218 hypothetical protein  
group\_2219 hypothetical protein  
group\_2222 hypothetical protein  
group\_2227 hypothetical protein  
group\_2235 hypothetical protein  
group\_2236 hypothetical protein  
group\_2240 hypothetical protein  
group\_228 hypothetical protein  
group\_234 hypothetical protein  
group\_237 hypothetical protein  
group\_244 hypothetical protein  
group\_246 hypothetical protein  
group\_247 hypothetical protein  
group\_249 PhoH-like protein  
group\_250 Pilin  
group\_251 hypothetical protein  
group\_253 hypothetical protein  
group\_257 hypothetical protein  
group\_258 hypothetical protein  
group\_261 hypothetical protein  
group\_264 hypothetical protein  
group\_334 hypothetical protein  
group\_337 hypothetical protein  
group\_341 hypothetical protein  
group\_344 hypothetical protein  
group\_345 hypothetical protein  
group\_348 hypothetical protein  
group\_352 hypothetical protein

|           |                                              |
|-----------|----------------------------------------------|
| group_353 | hypothetical protein                         |
| group_355 | putative NADH oxidase                        |
| group_359 | hypothetical protein                         |
| group_360 | hypothetical protein                         |
| group_366 | hypothetical protein                         |
| group_367 | hypothetical protein                         |
| group_371 | hypothetical protein                         |
| group_372 | hypothetical protein                         |
| group_374 | hypothetical protein                         |
| group_375 | hypothetical protein                         |
| group_378 | hypothetical protein                         |
| group_380 | hypothetical protein                         |
| group_381 | hypothetical protein                         |
| group_382 | hypothetical protein                         |
| group_383 | hypothetical protein                         |
| group_384 | hypothetical protein                         |
| group_386 | Fatty acid-binding protein                   |
| group_388 | hypothetical protein                         |
| group_391 | hypothetical protein                         |
| group_395 | hypothetical protein                         |
| group_396 | hypothetical protein                         |
| group_397 | hypothetical protein                         |
| group_398 | hypothetical protein                         |
| group_402 | hypothetical protein                         |
| group_406 | hypothetical protein                         |
| group_410 | hypothetical protein                         |
| group_414 | hypothetical protein                         |
| group_416 | hypothetical protein                         |
| group_418 | putative ABC transporter ATP-binding protein |
| group_420 | hypothetical protein                         |
| group_421 | hypothetical protein                         |

|           |                                      |
|-----------|--------------------------------------|
| group_424 | hypothetical protein                 |
| group_426 | hypothetical protein                 |
| group_432 | hypothetical protein                 |
| group_433 | hypothetical protein                 |
| group_440 | hypothetical protein                 |
| group_441 | Putative protein phosphatase 2C-type |
| group_443 | hypothetical protein                 |
| group_445 | hypothetical protein                 |
| group_451 | 5'-nucleotidase                      |
| group_458 | hypothetical protein                 |
| group_460 | Ferredoxin--NADP reductase           |
| group_461 | hypothetical protein                 |
| group_462 | hypothetical protein                 |
| group_463 | hypothetical protein                 |
| group_473 | hypothetical protein                 |
| group_474 | hypothetical protein                 |
| group_477 | hypothetical protein                 |
| group_480 | hypothetical protein                 |
| group_481 | hypothetical protein                 |
| group_482 | hypothetical protein                 |
| group_483 | hypothetical protein                 |
| group_487 | hypothetical protein                 |
| group_490 | hypothetical protein                 |
| group_493 | hypothetical protein                 |
| group_496 | hypothetical protein                 |
| group_497 | hypothetical protein                 |
| group_499 | hypothetical protein                 |
| group_503 | hypothetical protein                 |
| group_506 | hypothetical protein                 |
| group_515 | hypothetical protein                 |
| group_517 | hypothetical protein                 |

|           |                                                       |
|-----------|-------------------------------------------------------|
| group_520 | hypothetical protein                                  |
| group_521 | hypothetical protein                                  |
| group_523 | Ferredoxin--NADP reductase                            |
| group_526 | Putative membrane protein insertion efficiency factor |
| group_530 | hypothetical protein                                  |
| group_531 | hypothetical protein                                  |
| group_533 | hypothetical protein                                  |
| group_534 | hypothetical protein                                  |
| group_536 | hypothetical protein                                  |
| group_539 | hypothetical protein                                  |
| group_545 | hypothetical protein                                  |
| group_546 | hypothetical protein                                  |
| group_549 | hypothetical protein                                  |
| group_550 | hypothetical protein                                  |
| group_551 | hypothetical protein                                  |
| group_554 | hypothetical protein                                  |
| group_555 | hypothetical protein                                  |
| group_556 | hypothetical protein                                  |
| group_558 | hypothetical protein                                  |
| group_559 | hypothetical protein                                  |
| group_561 | hypothetical protein                                  |
| group_564 | hypothetical protein                                  |
| group_571 | hypothetical protein                                  |
| group_574 | hypothetical protein                                  |
| group_577 | Putative glutamine amidotransferase                   |
| group_581 | hypothetical protein                                  |
| group_582 | hypothetical protein                                  |
| group_585 | hypothetical protein                                  |
| group_586 | putative HTH-type transcriptional regulator           |
| group_587 | hypothetical protein                                  |
| group_588 | hypothetical protein                                  |

|           |                                              |
|-----------|----------------------------------------------|
| group_590 | Farnesyl diphosphate synthase                |
| group_591 | L-methionine gamma-lyase                     |
| group_594 | hypothetical protein                         |
| group_598 | hypothetical protein                         |
| group_599 | GTP cyclohydrolase 1 type 2                  |
| group_600 | hypothetical protein                         |
| group_601 | hypothetical protein                         |
| group_605 | hypothetical protein                         |
| group_606 | hypothetical protein                         |
| group_609 | Nitronate monooxygenase                      |
| group_610 | hypothetical protein                         |
| group_611 | hypothetical protein                         |
| group_612 | hypothetical protein                         |
| group_616 | hypothetical protein                         |
| group_622 | hypothetical protein                         |
| group_624 | hypothetical protein                         |
| group_625 | Putative peptidyl-prolyl cis-trans isomerase |
| group_627 | hypothetical protein                         |
| group_628 | hypothetical protein                         |
| group_629 | putative metallo-hydrolase                   |
| group_634 | hypothetical protein                         |
| group_635 | hypothetical protein                         |
| group_637 | hypothetical protein                         |
| group_640 | Nucleoid-associated protein                  |
| group_643 | hypothetical protein                         |
| group_646 | hypothetical protein                         |
| group_647 | hypothetical protein                         |
| group_654 | putative response regulatory protein         |
| group_655 | hypothetical protein                         |
| group_659 | hypothetical protein                         |
| group_660 | hypothetical protein                         |

|           |                                                  |
|-----------|--------------------------------------------------|
| group_661 | hypothetical protein                             |
| group_669 | hypothetical protein                             |
| group_672 | hypothetical protein                             |
| group_673 | hypothetical protein                             |
| group_674 | hypothetical protein                             |
| group_677 | hypothetical protein                             |
| group_680 | hypothetical protein                             |
| group_681 | hypothetical protein                             |
| group_684 | hypothetical protein                             |
| group_687 | hypothetical protein                             |
| group_698 | hypothetical protein                             |
| group_699 | hypothetical protein                             |
| group_700 | hypothetical protein                             |
| group_705 | hypothetical protein                             |
| group_717 | hypothetical protein                             |
| group_718 | hypothetical protein                             |
| group_719 | hypothetical protein                             |
| group_720 | hypothetical protein                             |
| group_723 | hypothetical protein                             |
| group_724 | hypothetical protein                             |
| group_726 | hypothetical protein                             |
| group_729 | hypothetical protein                             |
| group_733 | Putative lipid kinase                            |
| group_736 | hypothetical protein                             |
| group_743 | hypothetical protein                             |
| group_746 | hypothetical protein                             |
| group_752 | hypothetical protein                             |
| group_756 | hypothetical protein                             |
| group_758 | putative zinc protease                           |
| group_762 | CutC-like protein                                |
| group_765 | Putative TrmH family tRNA/rRNA methyltransferase |

|           |                                              |
|-----------|----------------------------------------------|
| group_767 | hypothetical protein                         |
| group_769 | hypothetical protein                         |
| group_771 | hypothetical protein                         |
| group_773 | hypothetical protein                         |
| group_776 | hypothetical protein                         |
| group_779 | Putative gluconeogenesis factor              |
| group_780 | hypothetical protein                         |
| group_783 | hypothetical protein                         |
| group_789 | hypothetical protein                         |
| group_791 | hypothetical protein                         |
| group_792 | hypothetical protein                         |
| group_793 | hypothetical protein                         |
| group_804 | Endo-alpha-N-acetylgalactosaminidase         |
| group_805 | hypothetical protein                         |
| group_806 | Fluoroquinolones export ATP-binding protein  |
| group_809 | hypothetical protein                         |
| group_810 | hypothetical protein                         |
| group_812 | hypothetical protein                         |
| group_818 | hypothetical protein                         |
| group_819 | hypothetical protein                         |
| group_820 | putative ABC transporter ATP-binding protein |
| group_821 | hypothetical protein                         |
| group_822 | hypothetical protein                         |
| group_823 | hypothetical protein                         |
| group_824 | hypothetical protein                         |
| group_826 | hypothetical protein                         |
| group_829 | hypothetical protein                         |
| group_831 | hypothetical protein                         |
| group_833 | hypothetical protein                         |
| group_836 | hypothetical protein                         |
| group_838 | hypothetical protein                         |

|           |                                                             |
|-----------|-------------------------------------------------------------|
| group_843 | hypothetical protein                                        |
| group_844 | hypothetical protein                                        |
| group_846 | hypothetical protein                                        |
| group_848 | Carboxynorspermidine synthase                               |
| group_849 | hypothetical protein                                        |
| group_851 | hypothetical protein                                        |
| group_856 | hypothetical protein                                        |
| group_858 | hypothetical protein                                        |
| group_864 | hypothetical protein                                        |
| group_870 | hypothetical protein                                        |
| group_876 | hypothetical protein                                        |
| group_878 | hypothetical protein                                        |
| group_879 | hypothetical protein                                        |
| group_881 | hypothetical protein                                        |
| group_882 | Deoxyguanosinetriphosphate triphosphohydrolase-like protein |
| group_887 | Stress response regulator gls24                             |
| group_889 | hypothetical protein                                        |
| group_890 | hypothetical protein                                        |
| group_893 | hypothetical protein                                        |
| group_902 | hypothetical protein                                        |
| group_906 | hypothetical protein                                        |
| group_908 | hypothetical protein                                        |
| group_909 | hypothetical protein                                        |
| group_911 | hypothetical protein                                        |
| group_915 | hypothetical protein                                        |
| group_916 | Secreted 45 kDa protein                                     |
| group_920 | hypothetical protein                                        |
| group_921 | hypothetical protein                                        |
| group_922 | putative ABC transporter ATP-binding protein                |
| group_927 | hypothetical protein                                        |
| group_928 | hypothetical protein                                        |

|           |                                                    |
|-----------|----------------------------------------------------|
| group_931 | hypothetical protein                               |
| group_932 | hypothetical protein                               |
| group_941 | hypothetical protein                               |
| group_943 | hypothetical protein                               |
| group_945 | hypothetical protein                               |
| group_946 | putative ABC transporter ATP-binding protein       |
| group_949 | hypothetical protein                               |
| group_954 | hypothetical protein                               |
| group_956 | hypothetical protein                               |
| group_957 | hypothetical protein                               |
| group_959 | hypothetical protein                               |
| group_96  | hypothetical protein                               |
| group_962 | hypothetical protein                               |
| group_965 | hypothetical protein                               |
| group_969 | putative oxidoreductase                            |
| group_975 | hypothetical protein                               |
| group_977 | hypothetical protein                               |
| group_981 | hypothetical protein                               |
| group_984 | N-acetyldiaminopimelate deacetylase                |
| group_987 | hypothetical protein                               |
| group_991 | hypothetical protein                               |
| group_993 | hypothetical protein                               |
| group_994 | hypothetical protein                               |
| group_997 | hypothetical protein                               |
| group_998 | hypothetical protein                               |
| group_999 | hypothetical protein                               |
| grpE      | Protein GrpE                                       |
| gsiC      | Glutathione transport system permease protein GsiC |
| gspA_1    | General stress protein A                           |
| gspA_2    | General stress protein A                           |
| gspF      | Putative type II secretion system protein F        |

|        |                                                                |
|--------|----------------------------------------------------------------|
| gtaB   | UTP--glucose-1-phosphate uridylyltransferase                   |
| gtf1   | Glycosyltransferase Gtf1                                       |
| gtf2_1 | Glycosyltransferase-stabilizing protein Gtf2                   |
| gtf2_2 | Glycosyltransferase-stabilizing protein Gtf2                   |
| gtf2_3 | Glycosyltransferase-stabilizing protein Gtf2                   |
| gtf2_4 | Glycosyltransferase-stabilizing protein Gtf2                   |
| gtfA   | Sucrose phosphorylase                                          |
| guaA   | GMP synthase [glutamine-hydrolyzing]                           |
| guaB_1 | Inosine-5'-monophosphate dehydrogenase                         |
| guaB_2 | Inosine-5'-monophosphate dehydrogenase                         |
| guaC   | GMP reductase                                                  |
| gyrA   | DNA gyrase subunit A                                           |
| gyrB   | DNA gyrase subunit B                                           |
| hcnC   | Hydrogen cyanide synthase subunit HcnC                         |
| hemH   | Ferrochelatase                                                 |
| hemN   | Oxygen-independent coproporphyrinogen-III oxidase-like protein |
| hepC   | Heparin-sulfate lyase                                          |
| hflK   | Modulator of FtsH protease HflK                                |
| hflX   | GTPase HflX                                                    |
| hisS   | Histidine--tRNA ligase                                         |
| hmo    | 4-hydroxymandelate oxidase                                     |
| hmpT   | Thiamine precursor transporter HmpT                            |
| hom    | Homoserine dehydrogenase                                       |
| hpdA   | 4-hydroxyphenylacetate decarboxylase activating enzyme         |
| hpf    | Ribosome hibernation promotion factor                          |
| hprK   | HPr kinase/phosphorylase                                       |
| hpt    | Hypoxanthine-guanine phosphoribosyltransferase                 |
| hrcA   | Heat-inducible transcription repressor HrcA                    |
| hsdM   | Type I restriction enzyme EcoKI M protein                      |
| hsdR   | Type-1 restriction enzyme R protein                            |
| hsdS   | hypothetical protein                                           |

|        |                                                    |
|--------|----------------------------------------------------|
| hsIO   | 33 kDa chaperonin                                  |
| hsIR   | Heat shock protein 15                              |
| hssS   | Heme sensor protein HssS                           |
| htpX   | Protease HtpX                                      |
| htrA   | Serine protease Do-like HtrA                       |
| hup    | DNA-binding protein HU                             |
| iga_1  | Immunoglobulin A1 protease                         |
| iga_2  | Immunoglobulin A1 protease                         |
| iga_3  | Immunoglobulin A1 protease                         |
| ileS   | Isoleucine--tRNA ligase                            |
| ilvA   | L-threonine dehydratase biosynthetic IlvA          |
| ilvB   | Acetolactate synthase large subunit                |
| ilvC   | Ketol-acid reductoisomerase (NADP(+))              |
| ilvD   | Dihydroxy-acid dehydratase                         |
| ilvE   | Branched-chain-amino-acid aminotransferase         |
| ilvH   | Putative acetolactate synthase small subunit       |
| immR   | HTH-type transcriptional regulator ImmR            |
| infA   | Translation initiation factor IF-1                 |
| infB   | Translation initiation factor IF-2                 |
| infC   | Translation initiation factor IF-3                 |
| iolW   | scyllo-inositol 2-dehydrogenase (NADP(+))          |
| iolX_1 | scyllo-inositol 2-dehydrogenase (NAD(+))           |
| iolX_2 | scyllo-inositol 2-dehydrogenase (NAD(+))           |
| irtA   | Iron import ATP-binding/permease protein IrtA      |
| iscS_1 | Cysteine desulfurase IscS                          |
| iscS_2 | Cysteine desulfurase IscS                          |
| iscU   | Iron-sulfur cluster assembly scaffold protein IscU |
| kcsA   | pH-gated potassium channel KcsA                    |
| kdgA   | KHG/KDPG aldolase                                  |
| kdgK   | 2-dehydro-3-deoxygluconokinase                     |
| kdgR   | HTH-type transcriptional regulator KdgR            |

|        |                                                                 |
|--------|-----------------------------------------------------------------|
| kstR2  | HTH-type transcriptional repressor KstR2                        |
| ktrA   | Ktr system potassium uptake protein A                           |
| ktrB   | Ktr system potassium uptake protein B                           |
| lacA   | Galactose-6-phosphate isomerase subunit LacA                    |
| lacB   | Galactose-6-phosphate isomerase subunit LacB                    |
| lacC_1 | Tagatose-6-phosphate kinase                                     |
| lacC_2 | Tagatose-6-phosphate kinase                                     |
| lacD   | Tagatose 16-diphosphate aldolase                                |
| lacE_1 | PTS system lactose-specific EIICB component                     |
| lacE_2 | PTS system lactose-specific EIICB component                     |
| lacF_1 | PTS system lactose-specific EIIA component                      |
| lacF_2 | PTS system lactose-specific EIIA component                      |
| lacF_3 | PTS system lactose-specific EIIA component                      |
| lacF_4 | Lactose transport system permease protein LacF                  |
| lacF_5 | Lactose transport system permease protein LacF                  |
| lacG_1 | 6-phospho-beta-galactosidase                                    |
| lacG_2 | 6-phospho-beta-galactosidase                                    |
| lacR_1 | Lactose phosphotransferase system repressor                     |
| lacR_2 | Lactose phosphotransferase system repressor                     |
| lacR_3 | HTH-type transcriptional regulator LacR                         |
| lafA   | Bacteriocin lactacin-F subunit LafA                             |
| lagD_1 | Lactococcin-G-processing and transport ATP-binding protein LagD |
| lagD_2 | Lactococcin-G-processing and transport ATP-binding protein LagD |
| lagD_3 | Lactococcin-G-processing and transport ATP-binding protein LagD |
| lagD_4 | Lactococcin-G-processing and transport ATP-binding protein LagD |
| lagD_5 | Lactococcin-G-processing and transport ATP-binding protein LagD |
| lcnD_1 | Lactococcin A secretion protein LcnD                            |
| lcnD_2 | Lactococcin A secretion protein LcnD                            |
| ldh    | L-lactate dehydrogenase                                         |
| lepA   | Elongation factor 4                                             |
| leuA   | 2-isopropylmalate synthase                                      |

|        |                                                                                |
|--------|--------------------------------------------------------------------------------|
| leuB_1 | 3-isopropylmalate dehydrogenase                                                |
| leuB_2 | 3-isopropylmalate dehydrogenase                                                |
| leuD   | 3-isopropylmalate dehydratase small subunit                                    |
| leuS   | Leucine--tRNA ligase                                                           |
| levE   | PTS system fructose-specific EIIB component                                    |
| levS   | Levansucrase                                                                   |
| lgt    | Prolipoprotein diacylglyceryl transferase                                      |
| liaR   | Transcriptional regulatory protein LiaR                                        |
| liaS   | Sensor histidine kinase LiaS                                                   |
| licA   | Lichenan-specific phosphotransferase enzyme IIA component                      |
| licC_1 | Lichenan permease IIC component                                                |
| licC_2 | Lichenan permease IIC component                                                |
| licC_3 | Lichenan permease IIC component                                                |
| licC_4 | Lichenan permease IIC component                                                |
| licC_5 | Lichenan permease IIC component                                                |
| licC_6 | Lichenan permease IIC component                                                |
| licR_1 | putative licABCH operon regulator                                              |
| licR_2 | putative licABCH operon regulator                                              |
| licT_1 | Transcription antiterminator LicT                                              |
| licT_2 | Transcription antiterminator LicT                                              |
| ligA   | DNA ligase                                                                     |
| limB   | Limonene 12-monooxygenase                                                      |
| livF   | High-affinity branched-chain amino acid transport ATP-binding protein LivF     |
| livH_1 | High-affinity branched-chain amino acid transport system permease protein LivH |
| livH_2 | High-affinity branched-chain amino acid transport system permease protein LivH |
| ImrA_1 | Multidrug resistance ABC transporter ATP-binding and permease protein          |
| ImrA_2 | Multidrug resistance ABC transporter ATP-binding and permease protein          |
| InpD   | UDP-glucose 4-epimerase                                                        |
| lon    | Lon protease                                                                   |
| lpd    | Dihydrolipoyl dehydrogenase                                                    |
| lplJ   | Lipoate-protein ligase LplJ                                                    |

|        |                                                           |
|--------|-----------------------------------------------------------|
| lptB   | Lipopolysaccharide export system ATP-binding protein LptB |
| lrp    | Leucine-rich protein                                      |
| lspA   | Lipoprotein signal peptidase                              |
| ltxB   | Leukotoxin export ATP-binding protein LtxB                |
| luxS   | S-ribosylhomocysteine lyase                               |
| lysA_1 | Diaminopimelate decarboxylase                             |
| lysA_2 | Diaminopimelate decarboxylase                             |
| lysS   | Lysine--tRNA ligase                                       |
| lytA_1 | Autolysin                                                 |
| lytA_2 | Autolysin                                                 |
| lytA_3 | Autolysin                                                 |
| lytA_5 | Autolysin                                                 |
| lytB_2 | Putative endo-beta-N-acetylglucosaminidase                |
| lytB_3 | Putative endo-beta-N-acetylglucosaminidase                |
| lytB_4 | Putative endo-beta-N-acetylglucosaminidase                |
| lytB_5 | Putative endo-beta-N-acetylglucosaminidase                |
| lytN   | putative cell wall hydrolase LytN                         |
| macB   | Macrolide export ATP-binding/permease protein MacB        |
| malF   | Maltose transport system permease protein MalF            |
| malG   | Maltose transport system permease protein MalG            |
| malK_1 | Maltose/maltodextrin import ATP-binding protein MalK      |
| malK_2 | Maltose/maltodextrin import ATP-binding protein MalK      |
| malP   | Maltodextrin phosphorylase                                |
| malQ   | 4-alpha-glucanotransferase                                |
| malR   | HTH-type transcriptional regulator MalR                   |
| malX   | Maltose/maltodextrin-binding protein                      |
| manA   | Mannose-6-phosphate isomerase ManA                        |
| manX_1 | PTS system mannose-specific EIIAB component               |
| manX_2 | PTS system mannose-specific EIIAB component               |
| manX_3 | PTS system mannose-specific EIIAB component               |
| manX_4 | PTS system mannose-specific EIIAB component               |

|        |                                                                       |
|--------|-----------------------------------------------------------------------|
| manZ_1 | PTS system mannose-specific EIID component                            |
| manZ_2 | PTS system mannose-specific EIID component                            |
| manZ_3 | PTS system mannose-specific EIID component                            |
| manZ_4 | PTS system mannose-specific EIID component                            |
| map    | Methionine aminopeptidase 1                                           |
| mapP   | Maltose 6'-phosphate phosphatase                                      |
| mapZ   | Mid-cell-anchored protein Z                                           |
| marR   | Multiple antibiotic resistance protein MarR                           |
| mcrB_1 | 5-methylcytosine-specific restriction enzyme B                        |
| mcrB_2 | 5-methylcytosine-specific restriction enzyme B                        |
| mecA   | Adapter protein MecA                                                  |
| menH   | 2-succinyl-6-hydroxy-24-cyclohexadiene-1-carboxylate synthase         |
| mepA   | Multidrug export protein MepA                                         |
| metA   | Homoserine O-succinyltransferase                                      |
| metE   | 5-methyltetrahydropteroyltriglutamate--homocysteine methyltransferase |
| metF   | 510-methylenetetrahydrofolate reductase                               |
| metG   | Methionine--tRNA ligase                                               |
| metI   | Cystathionine gamma-synthase/O-acetylhomoserine (thiol)-lyase         |
| metK   | S-adenosylmethionine synthase                                         |
| metN   | Methionine import ATP-binding protein MetN                            |
| metP   | Methionine import system permease protein MetP                        |
| metQ   | D-methionine-binding lipoprotein MetQ                                 |
| mfd    | Transcription-repair-coupling factor                                  |
| mgIA   | Galactose/methyl galactoside import ATP-binding protein MglA          |
| mgIC   | Galactoside transport system permease protein MglC                    |
| mgsR   | Regulatory protein MgsR                                               |
| miaA   | tRNA dimethylallyltransferase                                         |
| misCA  | Membrane protein insertase MisCA                                      |
| mltG   | Endolytic murein transglycosylase                                     |
| mngB   | Mannosylglycerate hydrolase                                           |
| mnmA   | tRNA-specific 2-thiouridylase MnmA                                    |

|         |                                                                  |
|---------|------------------------------------------------------------------|
| mnmE    | tRNA modification GTPase MnmE                                    |
| mnmG    | tRNA uridine 5-carboxymethylaminomethyl modification enzyme MnmG |
| mntB    | Manganese transport system membrane protein MntB                 |
| modC    | Molybdenum import ATP-binding protein ModC                       |
| moeB    | Molybdopterin-synthase adenylyltransferase                       |
| moeZ    | putative adenylyltransferase/sulfurtransferase MoeZ              |
| mraY    | Phospho-N-acetylmuramoyl-pentapeptide-transferase                |
| mreC    | Cell shape-determining protein MreC                              |
| mrnC    | Mini-ribonuclease 3                                              |
| mro     | Aldose 1-epimerase                                               |
| mrp     | Iron-sulfur cluster carrier protein                              |
| msbA    | Lipid A export ATP-binding/permease protein MsbA                 |
| mscL    | Large-conductance mechanosensitive channel                       |
| mshD_1  | Mycothiol acetyltransferase                                      |
| mshD_2  | Mycothiol acetyltransferase                                      |
| mshD_3  | Mycothiol acetyltransferase                                      |
| msmE    | Multiple sugar-binding protein                                   |
| msrAB_1 | Peptide methionine sulfoxide reductase MsrA/MsrB                 |
| msrAB_2 | Peptide methionine sulfoxide reductase MsrA/MsrB                 |
| msrAB1  | Peptide methionine sulfoxide reductase MsrA/MsrB 1               |
| msrC    | Free methionine-R-sulfoxide reductase                            |
| msrR    | Regulatory protein MsrR                                          |
| mtaD    | 5-methylthioadenosine/S-adenosylhomocysteine deaminase           |
| mtcA1   | Beta-carbonic anhydrase 1                                        |
| mtnN    | 5'-methylthioadenosine/S-adenosylhomocysteine nucleosidase       |
| murA1_1 | UDP-N-acetylglucosamine 1-carboxyvinyltransferase                |
| murA1_2 | UDP-N-acetylglucosamine 1-carboxyvinyltransferase 1              |
| murB    | UDP-N-acetylenolpyruvoylglucosamine reductase                    |
| murC    | UDP-N-acetylmuramate--L-alanine ligase                           |
| murD    | UDP-N-acetylmuramoylalanine--D-glutamate ligase                  |
| murE    | UDP-N-acetylmuramoyl-L-alanyl-D-glutamate--L-lysine ligase       |

|        |                                                                                               |
|--------|-----------------------------------------------------------------------------------------------|
| murF_1 | UDP-N-acetylmuramoyl-tripeptide--D-alanyl-D-alanine ligase                                    |
| murF_2 | UDP-N-acetylmuramoyl-tripeptide--D-alanyl-D-alanine ligase                                    |
| murG   | UDP-N-acetylglucosamine--N-acetylmuramyl-(pentapeptide) pyrophosphoryl-undecaprenol N         |
| murI   | Glutamate racemase                                                                            |
| murJ   | Lipid II flippase MurJ                                                                        |
| mutL   | DNA mismatch repair protein MutL                                                              |
| mutM   | Formamidopyrimidine-DNA glycosylase                                                           |
| mutS   | DNA mismatch repair protein MutS                                                              |
| mutS2  | Endonuclease MutS2                                                                            |
| mutX_1 | 8-oxo-dGTP diphosphatase                                                                      |
| mutX_2 | 8-oxo-dGTP diphosphatase                                                                      |
| mutY   | Adenine DNA glycosylase                                                                       |
| mvaA   | 3-hydroxy-3-methylglutaryl-coenzyme A reductase                                               |
| mvaS   | Hydroxymethylglutaryl-CoA synthase                                                            |
| nadC   | putative nicotinate-nucleotide pyrophosphorylase [carboxylating]                              |
| nadD   | Nicotinate-nucleotide adenylyltransferase                                                     |
| nadE   | NH(3)-dependent NAD(+) synthetase                                                             |
| nadK   | NAD kinase                                                                                    |
| nagA   | N-acetylglucosamine-6-phosphate deacetylase                                                   |
| nagAa  | Ferredoxin--NAD(P)(+) reductase (naphthalene dioxygenase/salicylate 5-hydroxylase ferredoxin) |
| nagB   | Glucosamine-6-phosphate deaminase                                                             |
| nagC_1 | N-acetylglucosamine repressor                                                                 |
| nagC_2 | N-acetylglucosamine repressor                                                                 |
| nanA_1 | N-acetylneuraminate lyase                                                                     |
| nanA_2 | N-acetylneuraminate lyase                                                                     |
| nanA_3 | Sialidase A                                                                                   |
| nanB_1 | Sialidase B                                                                                   |
| nanB_2 | Sialidase B                                                                                   |
| nanE_2 | Putative N-acetylmannosamine-6-phosphate 2-epimerase                                          |
| nanE_3 | Putative N-acetylmannosamine-6-phosphate 2-epimerase                                          |
| natA_1 | ABC transporter ATP-binding protein NatA                                                      |

|        |                                                                    |
|--------|--------------------------------------------------------------------|
| natA_2 | ABC transporter ATP-binding protein NatA                           |
| natA_3 | ABC transporter ATP-binding protein NatA                           |
| natA_4 | ABC transporter ATP-binding protein NatA                           |
| natA_5 | ABC transporter ATP-binding protein NatA                           |
| ndk    | Nucleoside diphosphate kinase                                      |
| ndvA   | Beta-(1-->2)glucan export ATP-binding/permease protein NdvA        |
| nfr1   | NADH-dependent flavin reductase subunit 1                          |
| nfr2   | NADH-dependent flavin reductase subunit 2                          |
| nfrA2  | FMN reductase [NAD(P)H]                                            |
| nhak   | Sodium potassium lithium and rubidium/H(+) antiporter              |
| niaR   | putative transcription repressor NiaR                              |
| niaX   | Niacin transporter NiaX                                            |
| nnrD   | ADP-dependent (S)-NAD(P)H-hydrate dehydratase                      |
| npIT   | Neopullulanase                                                     |
| nrdD_1 | Anaerobic ribonucleoside-triphosphate reductase                    |
| nrdD_2 | Anaerobic ribonucleoside-triphosphate reductase                    |
| nrdE1  | Ribonucleoside-diphosphate reductase subunit alpha 1               |
| nrdF   | Ribonucleoside-diphosphate reductase 2 subunit beta                |
| nrdG   | Anaerobic ribonucleoside-triphosphate reductase-activating protein |
| nrdH   | Glutaredoxin-like protein NrdH                                     |
| nrdR   | Transcriptional repressor NrdR                                     |
| nrnA   | putative bifunctional oligoribonuclease and PAP phosphatase NrnA   |
| nspC   | Carboxynorspermidine/carboxyspermidine decarboxylase               |
| ntpA   | V-type sodium ATPase catalytic subunit A                           |
| ntpB   | V-type sodium ATPase subunit B                                     |
| ntpC   | V-type sodium ATPase subunit C                                     |
| ntpD   | V-type sodium ATPase subunit D                                     |
| ntpG   | V-type sodium ATPase subunit G                                     |
| ntpK   | V-type sodium ATPase subunit K                                     |
| nudF   | ADP-ribose pyrophosphatase                                         |
| nusA   | Transcription termination/antitermination protein NusA             |

|        |                                                                           |
|--------|---------------------------------------------------------------------------|
| nusB   | N utilization substance protein B                                         |
| nusG   | Transcription termination/antitermination protein NusG                    |
| oatA   | O-acetyltransferase OatA                                                  |
| obg    | GTPase Obg                                                                |
| ogt    | Methylated-DNA--protein-cysteine methyltransferase                        |
| ohrR   | Organic hydroperoxide resistance transcriptional regulator                |
| oppC   | Oligopeptide transport system permease protein OppC                       |
| oppD   | Oligopeptide transport ATP-binding protein OppD                           |
| oppF   | Oligopeptide transport ATP-binding protein OppF                           |
| opuBA  | Choline transport ATP-binding protein OpuBA                               |
| opuCB  | Glycine betaine/carnitine/choline transport system permease protein OpuCB |
| paal   | Acyl-coenzyme A thioesterase Paal                                         |
| pabA   | Aminodeoxychorismate/anthranilate synthase component 2                    |
| pabB   | Aminodeoxychorismate synthase component 1                                 |
| pacS   | putative copper-transporting ATPase PacS                                  |
| paiA   | Spermidine/spermine N(1)-acetyltransferase                                |
| panT   | Pantothenic acid transporter PanT                                         |
| parC   | DNA topoisomerase 4 subunit A                                             |
| parE   | DNA topoisomerase 4 subunit B                                             |
| patA_1 | Putative N-acetyl-LL-diaminopimelate aminotransferase                     |
| patA_2 | Peptidoglycan O-acetyltransferase                                         |
| patB   | Cystathionine beta-lyase PatB                                             |
| pbpF_1 | Penicillin-binding protein 1F                                             |
| pbpF_2 | Penicillin-binding protein 1F                                             |
| pbpX_1 | Penicillin-binding protein 2X                                             |
| pbpX_2 | Putative penicillin-binding protein PbpX                                  |
| pbuO   | Guanine/hypoxanthine permease PbuO                                        |
| pcp_1  | Pyrrolidone-carboxylate peptidase                                         |
| pcp_2  | Pyrrolidone-carboxylate peptidase                                         |
| pcrA   | ATP-dependent DNA helicase PcrA                                           |
| pdg    | Ultraviolet N-glycosylase/AP lyase                                        |

|         |                                                                                          |
|---------|------------------------------------------------------------------------------------------|
| pdhC    | Dihydrolipoyllysine-residue acetyltransferase component of pyruvate dehydrogenase comple |
| pdp     | Pyrimidine-nucleoside phosphorylase                                                      |
| pdxK    | Pyridoxine kinase                                                                        |
| pdxS    | Pyridoxal 5'-phosphate synthase subunit PdxS                                             |
| pdxT    | Pyridoxal 5'-phosphate synthase subunit PdxT                                             |
| peb1A   | Major cell-binding factor                                                                |
| penA    | Penicillin-binding protein 2B                                                            |
| pepA_1  | Glutamyl aminopeptidase                                                                  |
| pepA_2  | Glutamyl aminopeptidase                                                                  |
| pepC    | Aminopeptidase C                                                                         |
| pepF1_1 | Oligoendopeptidase F plasmid                                                             |
| pepF1_2 | Oligoendopeptidase F plasmid                                                             |
| pepN    | Aminopeptidase N                                                                         |
| pepO    | Neutral endopeptidase                                                                    |
| pepQ    | Xaa-Pro dipeptidase                                                                      |
| pepS    | Aminopeptidase PepS                                                                      |
| pepT    | Peptidase T                                                                              |
| pepV    | Beta-Ala-Xaa dipeptidase                                                                 |
| pepX    | Xaa-Pro dipeptidyl-peptidase                                                             |
| pfbA    | Plasmin and fibronectin-binding protein A                                                |
| pfkA    | ATP-dependent 6-phosphofructokinase                                                      |
| pflA    | Pyruvate formate-lyase-activating enzyme                                                 |
| pflB    | Formate acetyltransferase                                                                |
| pgaC    | Poly-beta-16-N-acetyl-D-glucosamine synthase                                             |
| pgcA    | Phosphoglucomutase                                                                       |
| pgdA    | Peptidoglycan-N-acetylglucosamine deacetylase                                            |
| pgi     | Glucose-6-phosphate isomerase                                                            |
| pgk     | Phosphoglycerate kinase                                                                  |
| pgl     | 6-phosphogluconolactonase                                                                |
| pglA    | NN'-diacetylbaucillosaminy-diphospho-undecaprenol alpha-13-N-acetylgauctosaminyltranse   |
| pglF    | UDP-N-acetyl-alpha-D-glucosamine C6 dehydratase                                          |

|        |                                                                                          |
|--------|------------------------------------------------------------------------------------------|
| pglJ   | N-acetylgalactosamine-NN'-diacetylbaucillosaminyl-diphospho-undecaprenol 4-alpha-N-acety |
| pgsA   | CDP-diacylglycerol--glycerol-3-phosphate 3-phosphatidyltransferase                       |
| pheA   | Prephenate dehydratase                                                                   |
| pheS   | Phenylalanine--tRNA ligase alpha subunit                                                 |
| pheT_1 | Phenylalanine--tRNA ligase beta subunit                                                  |
| pheT_2 | Phenylalanine--tRNA ligase beta subunit                                                  |
| phnV_1 | Putative 2-aminoethylphosphonate transport system permease protein PhnV                  |
| phnV_2 | Putative 2-aminoethylphosphonate transport system permease protein PhnV                  |
| phoB   | Phosphate regulon transcriptional regulatory protein PhoB                                |
| phoP   | Alkaline phosphatase synthesis transcriptional regulatory protein PhoP                   |
| phoR   | Alkaline phosphatase synthesis sensor protein PhoR                                       |
| phoU_1 | Phosphate-specific transport system accessory protein PhoU                               |
| phoU_2 | Phosphate-specific transport system accessory protein PhoU                               |
| pinR   | Serine recombinase PinR                                                                  |
| pkn1   | Serine/threonine-protein kinase pkn1                                                     |
| plsC   | 1-acyl-sn-glycerol-3-phosphate acyltransferase                                           |
| plsX   | Phosphate acyltransferase                                                                |
| plsY   | Glycerol-3-phosphate acyltransferase                                                     |
| ply_1  | Pneumolysin                                                                              |
| ply_2  | Pneumolysin                                                                              |
| pncB2  | Nicotinate phosphoribosyltransferase pncB2                                               |
| pnp    | Polyribonucleotide nucleotidyltransferase                                                |
| pnuC   | Nicotinamide riboside transporter PnuC                                                   |
| polA   | DNA polymerase I                                                                         |
| polC_1 | DNA polymerase III PolC-type                                                             |
| polC_2 | DNA polymerase III PolC-type                                                             |
| ponA   | Penicillin-binding protein 1A                                                            |
| potA   | Spermidine/putrescine import ATP-binding protein PotA                                    |
| potB   | Spermidine/putrescine transport system permease protein PotB                             |
| potD_1 | Spermidine/putrescine-binding periplasmic protein                                        |
| potD_2 | Spermidine/putrescine-binding periplasmic protein                                        |

|         |                                                         |
|---------|---------------------------------------------------------|
| pox5    | Pyruvate oxidase                                        |
| ppaC    | putative manganese-dependent inorganic pyrophosphatase  |
| ppc     | Phosphoenolpyruvate carboxylase                         |
| pphA    | Serine/threonine-protein phosphatase 1                  |
| prfA    | Peptide chain release factor 1                          |
| prfB    | Peptide chain release factor 2                          |
| prfC    | Peptide chain release factor 3                          |
| priA    | Primosomal protein N'                                   |
| prmA    | Ribosomal protein L11 methyltransferase                 |
| prmC    | Release factor glutamine methyltransferase              |
| proA    | Gamma-glutamyl phosphate reductase                      |
| proB    | Glutamate 5-kinase 1                                    |
| proC    | Pyrroline-5-carboxylate reductase                       |
| proS    | Proline--tRNA ligase                                    |
| prs     | Ribose-phosphate pyrophosphokinase                      |
| prs2    | Ribose-phosphate pyrophosphokinase 2                    |
| prsA    | Foldase protein PrsA                                    |
| psaA    | Manganese ABC transporter substrate-binding lipoprotein |
| pspB    | Putative phosphoserine phosphatase 2                    |
| pstA2_1 | Phosphate transport system permease protein PstA 2      |
| pstA2_2 | Phosphate transport system permease protein PstA 2      |
| pstB3_1 | Phosphate import ATP-binding protein PstB 3             |
| pstB3_2 | Phosphate import ATP-binding protein PstB 3             |
| pstB3_3 | Phosphate import ATP-binding protein PstB 3             |
| pstC    | Phosphate transport system permease protein PstC        |
| pstC2   | Phosphate transport system permease protein PstC 2      |
| pstS1   | Phosphate-binding protein PstS 1                        |
| pstS2   | Phosphate-binding protein PstS 2                        |
| pta     | Phosphate acetyltransferase                             |
| pth     | Peptidyl-tRNA hydrolase                                 |
| ptrB    | Protease 2                                              |

|        |                                                                   |
|--------|-------------------------------------------------------------------|
| ptsG_1 | PTS system glucose-specific EIICBA component                      |
| ptsG_2 | PTS system glucose-specific EIICBA component                      |
| ptsH   | Phosphocarrier protein HPr                                        |
| ptsI   | Phosphoenolpyruvate-protein phosphotransferase                    |
| ptsP   | Phosphoenolpyruvate-dependent phosphotransferase system           |
| puck   | Uric acid permease Puck                                           |
| pulA   | Pullulanase                                                       |
| punA   | Purine nucleoside phosphorylase 1                                 |
| purA   | Adenylosuccinate synthetase                                       |
| purB   | Adenylosuccinate lyase                                            |
| purC   | Phosphoribosylaminoimidazole-succinocarboxamide synthase          |
| purD   | Phosphoribosylamine--glycine ligase                               |
| purE   | N5-carboxyaminoimidazole ribonucleotide mutase                    |
| purF   | Amidophosphoribosyltransferase                                    |
| purH   | Bifunctional purine biosynthesis protein PurH                     |
| purK   | N5-carboxyaminoimidazole ribonucleotide synthase                  |
| purL   | Phosphoribosylformylglycinamidine synthase                        |
| purM   | Phosphoribosylformylglycinamidine cyclo-ligase                    |
| purN   | Phosphoribosylglycinamide formyltransferase                       |
| purR   | Pur operon repressor                                              |
| pyk    | Pyruvate kinase                                                   |
| pyrB   | Aspartate carbamoyltransferase                                    |
| pyrC   | Dihydroorotase                                                    |
| pyrDA  | putative dihydroorotate dehydrogenase A (fumarate)                |
| pyrDB  | Dihydroorotate dehydrogenase B (NAD(+)) catalytic subunit         |
| pyrE   | Orotate phosphoribosyltransferase                                 |
| pyrF   | Orotidine 5'-phosphate decarboxylase                              |
| pyrG   | CTP synthase                                                      |
| pyrH   | Uridylate kinase                                                  |
| pyrK   | Dihydroorotate dehydrogenase B (NAD(+)) electron transfer subunit |
| pyrP   | Uracil permease                                                   |

|        |                                                            |
|--------|------------------------------------------------------------|
| pyrR   | Bifunctional protein PyrR                                  |
| queA   | S-adenosylmethionine:tRNA ribosyltransferase-isomerase     |
| queF   | NADPH-dependent 7-cyano-7-deazaguanine reductase           |
| queT   | Queuosine precursor transporter QueT                       |
| radA   | DNA repair protein RadA                                    |
| rapA   | RNA polymerase-associated protein RapA                     |
| rbgA   | Ribosome biogenesis GTPase A                               |
| rclA   | putative pyridine nucleotide-disulfide oxidoreductase RclA |
| rdgB   | dITP/XTP pyrophosphatase                                   |
| rebM   | Demethylrebeccamycin-D-glucose O-methyltransferase         |
| recA   | Protein RecA                                               |
| recD2  | ATP-dependent RecD-like DNA helicase                       |
| recF   | DNA replication and repair protein RecF                    |
| recG   | ATP-dependent DNA helicase RecG                            |
| recJ   | Single-stranded-DNA-specific exonuclease RecJ              |
| recN   | DNA repair protein RecN                                    |
| recO   | DNA repair protein RecO                                    |
| recR   | Recombination protein RecR                                 |
| recU   | Holliday junction resolvase RecU                           |
| recX   | Regulatory protein RecX                                    |
| regX3  | Sensory transduction protein regX3                         |
| relA   | Bifunctional (p)ppGpp synthase/hydrolase RelA              |
| resA   | Thiol-disulfide oxidoreductase ResA                        |
| rex    | Redox-sensing transcriptional repressor Rex                |
| rexB   | ATP-dependent helicase/deoxyribonuclease subunit B         |
| rfbA   | Glucose-1-phosphate thymidyltransferase 1                  |
| rfbC   | putative dTDP-4-dehydrorhamnose 35-epimerase               |
| rhaB   | L-Rhamnulokinase                                           |
| ribBA  | Riboflavin biosynthesis protein RibBA                      |
| ribD_1 | Riboflavin biosynthesis protein RibD                       |
| ribD_2 | Riboflavin biosynthesis protein RibD                       |

|         |                                                      |
|---------|------------------------------------------------------|
| ribE    | Riboflavin synthase                                  |
| ribF    | Riboflavin biosynthesis protein RibF                 |
| ribH    | 67-dimethyl-8-ribityllumazine synthase               |
| ribU    | Riboflavin transporter RibU                          |
| ribX    | Riboflavin transport system permease protein RibX    |
| ricR    | Copper-sensing transcriptional repressor RicR        |
| rimI    | N-alpha-acetyltransferase RimI                       |
| rimM    | Ribosome maturation factor RimM                      |
| rimP    | Ribosome maturation factor RimP                      |
| rizA    | L-arginine-specific L-amino acid ligase              |
| rlmA    | 23S rRNA (guanine(745)-N(1))-methyltransferase       |
| rlmCD_1 | 23S rRNA (uracil-C(5))-methyltransferase RlmCD       |
| rlmCD_2 | 23S rRNA (uracil-C(5))-methyltransferase RlmCD       |
| rlmD    | 23S rRNA (uracil(1939)-C(5))-methyltransferase RlmD  |
| rlmH    | Ribosomal RNA large subunit methyltransferase H      |
| rlmI    | Ribosomal RNA large subunit methyltransferase I      |
| rlmL    | Ribosomal RNA large subunit methyltransferase K/L    |
| rlmN_1  | putative dual-specificity RNA methyltransferase RlmN |
| rlmN_2  | Dual-specificity RNA methyltransferase RlmN          |
| rluB    | Ribosomal large subunit pseudouridine synthase B     |
| rluD_1  | Ribosomal large subunit pseudouridine synthase D     |
| rluD_2  | Ribosomal large subunit pseudouridine synthase D     |
| rlmB    | dTDP-glucose 46-dehydratase                          |
| rlmD_1  | dTDP-4-dehydrorhamnose reductase                     |
| rlmD_2  | dTDP-4-dehydrorhamnose reductase                     |
| rnc     | Ribonuclease 3                                       |
| rnhB    | Ribonuclease HII                                     |
| rnhC    | Ribonuclease HIII                                    |
| rnj1    | Ribonuclease J 1                                     |
| rnj2    | Ribonuclease J 2                                     |
| rnmV    | Ribonuclease M5                                      |

|       |                                         |
|-------|-----------------------------------------|
| rnpA  | Ribonuclease P protein component        |
| rnr   | Ribonuclease R                          |
| rny   | Ribonuclease Y                          |
| rnz   | Ribonuclease Z                          |
| rodA  | Peptidoglycan glycosyltransferase RodA  |
| rodZ  | Cytoskeleton protein RodZ               |
| rpe   | Ribulose-phosphate 3-epimerase          |
| rpiA  | Ribose-5-phosphate isomerase A          |
| rpiR  | HTH-type transcriptional regulator RpiR |
| rplA  | 50S ribosomal protein L1                |
| rplB  | 50S ribosomal protein L2                |
| rplC  | 50S ribosomal protein L3                |
| rplE  | 50S ribosomal protein L5                |
| rplF  | 50S ribosomal protein L6                |
| rplGA | putative ribosomal protein YlxQ         |
| rplI  | 50S ribosomal protein L9                |
| rplJ  | 50S ribosomal protein L10               |
| rplK  | 50S ribosomal protein L11               |
| rplL  | 50S ribosomal protein L7/L12            |
| rplM  | 50S ribosomal protein L13               |
| rplN  | 50S ribosomal protein L14               |
| rplO  | 50S ribosomal protein L15               |
| rplP  | 50S ribosomal protein L16               |
| rplQ  | 50S ribosomal protein L17               |
| rplR  | 50S ribosomal protein L18               |
| rplS  | 50S ribosomal protein L19               |
| rplT  | 50S ribosomal protein L20               |
| rplU  | 50S ribosomal protein L21               |
| rplV  | 50S ribosomal protein L22               |
| rplW  | 50S ribosomal protein L23               |
| rplX  | 50S ribosomal protein L24               |

|        |                                                    |
|--------|----------------------------------------------------|
| rpmA   | 50S ribosomal protein L27                          |
| rpmB   | 50S ribosomal protein L28                          |
| rpmC   | 50S ribosomal protein L29                          |
| rpmD   | 50S ribosomal protein L30                          |
| rpmE2  | 50S ribosomal protein L31 type B                   |
| rpmF   | 50S ribosomal protein L32                          |
| rpmGA  | 50S ribosomal protein L33 1                        |
| rpmI   | 50S ribosomal protein L35                          |
| rpoA   | DNA-directed RNA polymerase subunit alpha          |
| rpoB   | DNA-directed RNA polymerase subunit beta           |
| rpoC   | DNA-directed RNA polymerase subunit beta'          |
| rpoE   | putative DNA-directed RNA polymerase subunit delta |
| rpoZ   | DNA-directed RNA polymerase subunit omega          |
| rpsA_1 | 30S Ribosomal protein S1                           |
| rpsA_2 | 30S ribosomal protein S1                           |
| rpsB   | 30S ribosomal protein S2                           |
| rpsC   | 30S ribosomal protein S3                           |
| rpsD   | 30S ribosomal protein S4                           |
| rpsE   | 30S ribosomal protein S5                           |
| rpsF   | 30S ribosomal protein S6                           |
| rpsG   | 30S ribosomal protein S7                           |
| rpsH   | 30S ribosomal protein S8                           |
| rpsI   | 30S ribosomal protein S9                           |
| rpsJ   | 30S ribosomal protein S10                          |
| rpsK   | 30S ribosomal protein S11                          |
| rpsL   | 30S ribosomal protein S12                          |
| rpsM   | 30S ribosomal protein S13                          |
| rpsN2  | Alternate 30S ribosomal protein S14                |
| rpsO   | 30S ribosomal protein S15                          |
| rpsP   | 30S ribosomal protein S16                          |
| rpsQ   | 30S ribosomal protein S17                          |

|        |                                                   |
|--------|---------------------------------------------------|
| rpsR   | 30S ribosomal protein S18                         |
| rpsS   | 30S ribosomal protein S19                         |
| rpsT   | 30S ribosomal protein S20                         |
| rpsU   | 30S ribosomal protein S21                         |
| rsfS   | Ribosomal silencing factor RsfS                   |
| rsgA   | Small ribosomal subunit biogenesis GTPase RsgA    |
| rsmA   | Ribosomal RNA small subunit methyltransferase A   |
| rsmB   | Ribosomal RNA small subunit methyltransferase B   |
| rsmC   | Ribosomal RNA small subunit methyltransferase C   |
| rsmD   | Ribosomal RNA small subunit methyltransferase D   |
| rsmE   | Ribosomal RNA small subunit methyltransferase E   |
| rsmF   | Ribosomal RNA small subunit methyltransferase F   |
| rsmG   | Ribosomal RNA small subunit methyltransferase G   |
| rsmH_1 | Ribosomal RNA small subunit methyltransferase H   |
| rsmH_2 | Ribosomal RNA small subunit methyltransferase H   |
| rsml   | Ribosomal RNA small subunit methyltransferase I   |
| rsuA_1 | Ribosomal small subunit pseudouridine synthase A  |
| rsuA_2 | Ribosomal small subunit pseudouridine synthase A  |
| ruvA   | Holliday junction ATP-dependent DNA helicase RuvA |
| ruvB   | Holliday junction ATP-dependent DNA helicase RuvB |
| sacA   | Sucrose-6-phosphate hydrolase                     |
| saeR   | Response regulator SaeR                           |
| saeS   | Histidine protein kinase SaeS                     |
| sall   | Adenosyl-chloride synthase                        |
| sarA_1 | Oligopeptide-binding protein SarA                 |
| sarA_2 | Oligopeptide-binding protein SarA                 |
| sarA_3 | Oligopeptide-binding protein SarA                 |
| scpA   | Segregation and condensation protein A            |
| scpB   | Segregation and condensation protein B            |
| scrB   | Sucrose-6-phosphate hydrolase                     |
| sdhA   | L-serine dehydratase alpha chain                  |

|        |                                                        |
|--------|--------------------------------------------------------|
| sdhB   | L-serine dehydratase beta chain                        |
| sdrD   | Serine-aspartate repeat-containing protein D           |
| secA_1 | Protein translocase subunit SecA                       |
| secA_2 | Protein translocase subunit SecA                       |
| secG   | putative protein-export membrane protein SecG          |
| secY   | Protein translocase subunit SecY                       |
| secY2  | Accessory Sec system protein translocase subunit SecY2 |
| sepF   | Cell division protein SepF                             |
| serB   | Phosphoserine phosphatase                              |
| serS   | Serine--tRNA ligase                                    |
| sglT   | Sodium/glucose cotransporter                           |
| sigA   | RNA polymerase sigma factor SigA                       |
| skfE   | SkfA peptide export ATP-binding protein SkfE           |
| slmA   | Nucleoid occlusion factor SlmA                         |
| slyA_1 | Transcriptional regulator SlyA                         |
| slyA_2 | Transcriptional regulator SlyA                         |
| smc    | Chromosome partition protein Smc                       |
| smpB   | SsrA-binding protein                                   |
| sodA   | Superoxide dismutase [Mn]                              |
| sorA   | PTS system sorbose-specific EIIC component             |
| sorB_1 | PTS system sorbose-specific EIIB component             |
| sorB_2 | PTS system sorbose-specific EIIB component             |
| sorC_1 | PTS system sorbose-specific EIIC component             |
| sorC_2 | Sorbitol operon regulator                              |
| sorC_3 | PTS system sorbose-specific EIIC component             |
| soxS   | Regulatory protein SoxS                                |
| speA   | Arginine decarboxylase                                 |
| speE   | Polyamine aminopropyltransferase                       |
| spo0C  | Chromosome-partitioning protein Spo0J                  |
| spsB_1 | Signal peptidase IB                                    |
| spsB_2 | Signal peptidase IB                                    |

|        |                                                       |
|--------|-------------------------------------------------------|
| spxA_1 | Regulatory protein Spx                                |
| spxA_2 | Regulatory protein Spx                                |
| spxA_3 | Regulatory protein Spx                                |
| srIR_1 | Glucitol operon repressor                             |
| srIR_2 | Glucitol operon repressor                             |
| ssb_1  | Single-stranded DNA-binding protein                   |
| ssb_2  | Single-stranded DNA-binding protein                   |
| sstT   | Serine/threonine transporter SstT                     |
| stkP   | Serine/threonine-protein kinase StkP                  |
| strH_1 | Beta-N-acetylhexosaminidase                           |
| strH_2 | Beta-N-acetylhexosaminidase                           |
| sttH   | Streptothricin hydrolase                              |
| sufB_1 | FeS cluster assembly protein SufB                     |
| sufB_2 | FeS cluster assembly protein SufB                     |
| sufS   | Cysteine desulfurase SufS                             |
| sugC   | Trehalose import ATP-binding protein SugC             |
| suhB   | Fructose-16-bisphosphatase/inositol-1-monophosphatase |
| sulA   | Dihydropteroate synthase                              |
| sulD   | Bifunctional folate synthesis protein                 |
| tabA_1 | Toxin-antitoxin biofilm protein TabA                  |
| tabA_2 | Toxin-antitoxin biofilm protein TabA                  |
| tadA   | tRNA-specific adenosine deaminase                     |
| tag    | DNA-3-methyladenine glycosylase 1                     |
| tarI   | Ribitol-5-phosphate cytidyltransferase                |
| tarJ   | Ribulose-5-phosphate reductase                        |
| tcyA_1 | L-cystine-binding protein TcyA                        |
| tcyA_2 | L-cystine-binding protein TcyA                        |
| tcyC   | L-cystine import ATP-binding protein TcyC             |
| tcyJ   | L-cystine-binding protein TcyJ                        |
| tcyN   | L-cystine import ATP-binding protein TcyN             |
| tdk    | Thymidine kinase                                      |

|        |                                                                   |
|--------|-------------------------------------------------------------------|
| tehB   | putative S-adenosyl-L-methionine-dependent methyltransferase TehB |
| tenA_1 | Aminopyrimidine aminohydrolase                                    |
| tenA_2 | Aminopyrimidine aminohydrolase                                    |
| tgt    | Queuine tRNA-ribosyltransferase                                   |
| thiD   | Hydroxymethylpyrimidine/phosphomethylpyrimidine kinase            |
| thiE_1 | Thiamine-phosphate synthase                                       |
| thiE_2 | Thiamine-phosphate synthase                                       |
| thiI   | putative tRNA sulfurtransferase                                   |
| thiM_1 | Hydroxyethylthiazole kinase                                       |
| thiM_2 | Hydroxyethylthiazole kinase                                       |
| thiN   | Thiamine pyrophosphokinase                                        |
| thiY   | Formylaminopyrimidine-binding protein                             |
| thrB_1 | Homoserine kinase                                                 |
| thrB_2 | Homoserine kinase                                                 |
| thrC   | Threonine synthase                                                |
| thrS   | Threonine--tRNA ligase                                            |
| thyA   | Thymidylate synthase                                              |
| tig    | Trigger factor                                                    |
| tilS   | tRNA(Ile)-lysidine synthase                                       |
| tkt_1  | Transketolase                                                     |
| tkt_2  | Transketolase                                                     |
| tlyA   | Hemolysin A                                                       |
| tmk    | Thymidylate kinase                                                |
| tmpC   | Membrane lipoprotein TmpC                                         |
| topA   | DNA topoisomerase 1                                               |
| tpiA   | Triosephosphate isomerase                                         |
| tpx    | putative thiol peroxidase                                         |
| tqsA   | AI-2 transport protein TqsA                                       |
| treA   | Trehalose-6-phosphate hydrolase                                   |
| treB   | PTS system trehalose-specific EIIBC component                     |
| treP   | PTS system trehalose-specific EIIBC component                     |

|       |                                                                     |
|-------|---------------------------------------------------------------------|
| treR  | HTH-type transcriptional regulator TreR                             |
| trkA  | Trk system potassium uptake protein TrkA                            |
| trkG  | Trk system potassium uptake protein TrkG                            |
| trmB  | tRNA (guanine-N(7)-)-methyltransferase                              |
| trmD  | tRNA (guanine-N(1)-)-methyltransferase                              |
| trmFO | Methylenetetrahydrofolate--tRNA-(uracil-5-)-methyltransferase TrmFO |
| trmK  | tRNA (adenine(22)-N(1))-methyltransferase                           |
| trmL  | tRNA (cytidine(34)-2'-O)-methyltransferase                          |
| trpA  | Tryptophan synthase alpha chain                                     |
| trpB  | Tryptophan synthase beta chain                                      |
| trpC  | Indole-3-glycerol phosphate synthase                                |
| trpD  | Anthranilate phosphoribosyltransferase                              |
| trpE  | Anthranilate synthase component 1                                   |
| trpF  | N-(5'-phosphoribosyl)anthranilate isomerase                         |
| trpS2 | Tryptophan--tRNA ligase 2                                           |
| truA  | tRNA pseudouridine synthase A                                       |
| truB  | tRNA pseudouridine synthase B                                       |
| truC  | tRNA pseudouridine synthase C                                       |
| trxA  | Thioredoxin                                                         |
| trxB  | Thioredoxin reductase                                               |
| tsaB  | tRNA threonylcarbamoyladenosine biosynthesis protein TsaB           |
| tsaD  | tRNA N6-adenosine threonylcarbamoyltransferase                      |
| tsaE  | tRNA threonylcarbamoyladenosine biosynthesis protein TsaE           |
| tsf   | Elongation factor Ts                                                |
| typA  | GTP-binding protein TypA/BipA                                       |
| tyrA  | Prephenate dehydrogenase                                            |
| tyrS  | Tyrosine--tRNA ligase                                               |
| udk_1 | Uridine kinase                                                      |
| udk_2 | Uridine kinase                                                      |
| ugd_1 | UDP-glucose 6-dehydrogenase                                         |
| ugd_2 | UDP-glucose 6-dehydrogenase                                         |

|        |                                                                               |
|--------|-------------------------------------------------------------------------------|
| ugt    | Unsaturated chondroitin disaccharide hydrolase                                |
| ugpA   | sn-glycerol-3-phosphate transport system permease protein UgpA                |
| ulaA_1 | Ascorbate-specific PTS system EIIC component                                  |
| ulaA_2 | Ascorbate-specific PTS system EIIC component                                  |
| ulaB   | Ascorbate-specific PTS system EIIB component                                  |
| ulaC   | Ascorbate-specific PTS system EIIA component                                  |
| ulaD   | 3-keto-L-gulonate-6-phosphate decarboxylase UlaD                              |
| ulaE   | L-ribulose-5-phosphate 3-epimerase UlaE                                       |
| ulaG   | putative L-ascorbate-6-phosphate lactonase UlaG                               |
| ung    | Uracil-DNA glycosylase                                                        |
| upp    | Uracil phosphoribosyltransferase                                              |
| uppP   | Undecaprenyl-diphosphatase                                                    |
| uppS   | Isoprenyl transferase                                                         |
| uvrA   | UvrABC system protein A                                                       |
| uvrB   | UvrABC system protein B                                                       |
| uvrC   | UvrABC system protein C                                                       |
| valS   | Valine--tRNA ligase                                                           |
| walk_1 | Sensor histidine kinase Walk                                                  |
| walk_2 | Sensor histidine kinase Walk                                                  |
| walR   | Transcriptional regulatory protein WalR                                       |
| wbbI   | Beta-16-galactofuranosyltransferase WbbI                                      |
| wbgU   | UDP-N-acetylglucosamine 4-epimerase                                           |
| wcaJ   | UDP-glucose:undecaprenyl-phosphate glucose-1-phosphate transferase            |
| wfgD   | UDP-Glc:alpha-D-GlcNAc-diphosphoundecaprenol beta-13-glucosyltransferase WfgD |
| whiA   | Putative sporulation transcription regulator WhiA                             |
| xerS   | Tyrosine recombinase XerS                                                     |
| xpt    | Xanthine phosphoribosyltransferase                                            |
| xseA   | Exodeoxyribonuclease 7 large subunit                                          |
| xseB   | Exodeoxyribonuclease 7 small subunit                                          |
| xyIH   | 2-hydroxymuconate tautomerase                                                 |
| yabA   | Initiation-control protein YabA                                               |

|        |                                                             |
|--------|-------------------------------------------------------------|
| yabJ   | 2-iminobutanoate/2-iminopropanoate deaminase                |
| yafQ   | mRNA interferase YafQ                                       |
| ybaK   | Cys-tRNA(Pro)/Cys-tRNA(Cys) deacylase YbaK                  |
| ybaN   | Inner membrane protein YbaN                                 |
| ybbH_1 | putative HTH-type transcriptional regulator YbbH            |
| ybbH_2 | putative HTH-type transcriptional regulator YbbH            |
| ybeY   | Endoribonuclease YbeY                                       |
| ybhL   | Inner membrane protein YbhL                                 |
| ybiT_1 | putative ABC transporter ATP-binding protein YbiT           |
| ybiT_2 | putative ABC transporter ATP-binding protein YbiT           |
| ybiV   | Sugar phosphatase YbiV                                      |
| ybjI   | 5-amino-6-(5-phospho-D-ribitylamino)uracil phosphatase YbjI |
| ycfH   | putative metal-dependent hydrolase YcfH                     |
| ychF   | Ribosome-binding ATPase YchF                                |
| ycjO   | Inner membrane ABC transporter permease protein YcjO        |
| ycjP   | Inner membrane ABC transporter permease protein YcjP        |
| yclM   | Aspartokinase 3                                             |
| yclQ   | putative ABC transporter solute-binding protein YclQ        |
| ydaF_1 | Putative ribosomal N-acetyltransferase YdaF                 |
| ydaF_2 | Putative ribosomal N-acetyltransferase YdaF                 |
| ydaF_3 | Putative ribosomal N-acetyltransferase YdaF                 |
| ydaF_4 | Putative ribosomal N-acetyltransferase YdaF                 |
| ydaF_5 | Putative ribosomal N-acetyltransferase YdaF                 |
| ydcV   | Inner membrane ABC transporter permease protein YdcV        |
| ydfG   | NADP-dependent 3-hydroxy acid dehydrogenase YdfG            |
| ydhF   | Oxidoreductase YdhF                                         |
| yecD   | Isochorismatase family protein YecD                         |
| yecS_1 | L-cystine transport system permease protein YecS            |
| yecS_2 | L-cystine transport system permease protein YecS            |
| yecS_3 | L-cystine transport system permease protein YecS            |
| yeeO   | putative FMN/FAD exporter YeeO                              |

|        |                                                                                 |
|--------|---------------------------------------------------------------------------------|
| yehU   | Sensor histidine kinase YehU                                                    |
| yesO_1 | Putative ABC transporter substrate-binding protein YesO                         |
| yesO_2 | Putative ABC transporter substrate-binding protein YesO                         |
| yesO_3 | Putative ABC transporter substrate-binding protein YesO                         |
| yfhA   | putative siderophore transport system permease protein YfhA                     |
| yfiC   | tRNA <sup>1</sup> (Val) (adenine(37)-N <sup>6</sup> )-methyltransferase         |
| yfkJ   | Low molecular weight protein-tyrosine-phosphatase YfkJ                          |
| yfmC   | Fe(3+)-citrate-binding protein YfmC                                             |
| yfmL   | putative ATP-dependent RNA helicase YfmL                                        |
| yfnB   | Putative HAD-hydrolase YfnB                                                     |
| ygaZ   | Inner membrane protein YgaZ                                                     |
| ygfA   | 5-formyltetrahydrofolate cyclo-ligase                                           |
| yghU   | Disulfide-bond oxidoreductase YghU                                              |
| yhaM   | 3'-5' exoribonuclease YhaM                                                      |
| yhbU   | putative protease YhbU                                                          |
| yhbY   | RNA-binding protein YhbY                                                        |
| yhdG   | putative amino acid permease YhdG                                               |
| yhdJ   | DNA adenine methyltransferase YhdJ                                              |
| yheH   | putative multidrug resistance ABC transporter ATP-binding/permease protein YheH |
| yheI_1 | putative multidrug resistance ABC transporter ATP-binding/permease protein YheI |
| yheI_2 | putative multidrug resistance ABC transporter ATP-binding/permease protein YheI |
| yheS_1 | putative ABC transporter ATP-binding protein YheS                               |
| yheS_2 | putative ABC transporter ATP-binding protein YheS                               |
| yhjX   | putative MFS-type transporter YhjX                                              |
| yicL_1 | putative inner membrane transporter YicL                                        |
| yicL_2 | putative inner membrane transporter YicL                                        |
| yidA_1 | Sugar phosphatase YidA                                                          |
| yidA_2 | Sugar phosphatase YidA                                                          |
| yidC2  | Membrane protein insertase YidC 2                                               |
| yigZ   | IMPACT family member YigZ                                                       |
| yitU   | 5-amino-6-(5-phospho-D-ribitylamino)uracil phosphatase YitU                     |

|        |                                                                |
|--------|----------------------------------------------------------------|
| yjbK   | Putative triphosphatase YjbK                                   |
| yjbM   | GTP pyrophosphokinase YjbM                                     |
| yjhB   | Putative metabolite transport protein YjhB                     |
| yjjP   | Inner membrane protein YjjP                                    |
| ykfA   | putative murein peptide carboxypeptidase                       |
| yknX   | Putative efflux system component YknX                          |
| yknY_1 | putative ABC transporter ATP-binding protein YknY              |
| yknY_2 | putative ABC transporter ATP-binding protein YknY              |
| yknY_3 | putative ABC transporter ATP-binding protein YknY              |
| yknZ   | putative ABC transporter permease YknZ                         |
| ykoD_1 | Putative HMP/thiamine import ATP-binding protein YkoD          |
| ykoD_2 | Putative HMP/thiamine import ATP-binding protein YkoD          |
| ykoD_3 | Putative HMP/thiamine import ATP-binding protein YkoD          |
| ykoE   | Putative HMP/thiamine permease protein YkoE                    |
| ykuL   | CBS domain-containing protein YkuL                             |
| ykuT   | putative MscS family protein YkuT                              |
| yodJ   | Putative carboxypeptidase YodJ                                 |
| ypdF   | Aminopeptidase YpdF                                            |
| yraA   | Putative cysteine protease YraA                                |
| yrrK   | Putative pre-16S rRNA nuclease                                 |
| yteP_1 | putative multiple-sugar transport system permease YteP         |
| yteP_2 | putative multiple-sugar transport system permease YteP         |
| ytpP   | Thioredoxin-like protein YtpP                                  |
| ytrA   | HTH-type transcriptional repressor YtrA                        |
| yugI   | General stress protein 13                                      |
| yumC   | Ferredoxin--NADP reductase 2                                   |
| yusV   | putative siderophore transport system ATP-binding protein YusV |
| yutF   | Acid sugar phosphatase                                         |
| yvcJ   | Nucleotide-binding protein YvcJ                                |
| yvgN   | Glyoxal reductase                                              |
| yvoA   | HTH-type transcriptional repressor YvoA                        |

|            |                                                            |
|------------|------------------------------------------------------------|
| ywlC       | Threonylcarbamoyl-AMP synthase                             |
| ywnA       | Putative HTH-type transcriptional regulator YwnA           |
| ywqC       | putative capsular polysaccharide biosynthesis protein YwqC |
| ywtF       | Putative transcriptional regulator YwtF                    |
| yxdL_1     | ABC transporter ATP-binding protein YxdL                   |
| yxdL_2     | ABC transporter ATP-binding protein YxdL                   |
| yxdL_3     | ABC transporter ATP-binding protein YxdL                   |
| yxnN       | putative amino-acid permease protein YxnN                  |
| yxIF_1     | putative ABC transporter ATP-binding protein YxIF          |
| yxIF_2     | putative ABC transporter ATP-binding protein YxIF          |
| yycB       | putative transporter YycB                                  |
| yycJ       | Putative metallo-hydrolase YycJ                            |
| znuA_1     | High-affinity zinc uptake system binding-protein ZnuA      |
| znuA_2     | High-affinity zinc uptake system binding-protein ZnuA      |
| znuB       | High-affinity zinc uptake system membrane protein ZnuB     |
| znuC       | High-affinity zinc uptake system ATP-binding protein ZnuC  |
| zwf        | Glucose-6-phosphate 1-dehydrogenase                        |
| argR_2     | Arginine repressor                                         |
| group_138  | hypothetical protein                                       |
| group_143  | hypothetical protein                                       |
| group_1492 | hypothetical protein                                       |
| group_210  | hypothetical protein                                       |
| group_2230 | hypothetical protein                                       |
| group_235  | hypothetical protein                                       |
| group_278  | hypothetical protein                                       |
| group_281  | hypothetical protein                                       |
| group_283  | hypothetical protein                                       |
| group_287  | hypothetical protein                                       |
| group_289  | hypothetical protein                                       |
| group_292  | hypothetical protein                                       |
| group_295  | hypothetical protein                                       |

|            |                                                      |
|------------|------------------------------------------------------|
| group_862  | hypothetical protein                                 |
| Int-Tn     | Transposase from transposon Tn916                    |
| nanE_1     | Putative N-acetylmannosamine-6-phosphate 2-epimerase |
| norM       | Multidrug resistance protein NorM                    |
| rbfA       | Ribosome-binding factor A                            |
| rplD       | 50S ribosomal protein L4                             |
| rpmH       | 50S ribosomal protein L34                            |
| group_10   | hypothetical protein                                 |
| group_2183 | hypothetical protein                                 |
| group_225  | Acetyltransferase                                    |
| group_280  | hypothetical protein                                 |
| group_293  | hypothetical protein                                 |
| group_297  | hypothetical protein                                 |
| group_1303 | hypothetical protein                                 |
| tuf        | hypothetical protein                                 |
| group_124  | hypothetical protein                                 |
| group_66   | hypothetical protein                                 |
| group_298  | hypothetical protein                                 |
| lytA_4     | Autolysin                                            |
| ydcP_1     | putative protease YdcP                               |
| ydcP_2     | putative protease YdcP                               |
| group_214  | hypothetical protein                                 |
| group_215  | hypothetical protein                                 |
| prtP       | PII-type proteinase                                  |
| group_236  | hypothetical protein                                 |
| group_276  | Putative endo-beta-N-acetylglucosaminidase           |
| group_294  | hypothetical protein                                 |
| group_182  | hypothetical protein                                 |
| group_288  | hypothetical protein                                 |
| group_290  | hypothetical protein                                 |
| group_275  | hypothetical protein                                 |

|            |                                                        |
|------------|--------------------------------------------------------|
| group_34   | hypothetical protein                                   |
| ltrA       | Group II intron-encoded protein LtrA                   |
| group_300  | hypothetical protein                                   |
| group_38   | hypothetical protein                                   |
| group_47   | hypothetical protein                                   |
| group_240  | hypothetical protein                                   |
| group_266  | hypothetical protein                                   |
| group_71   | hypothetical protein                                   |
| group_144  | hypothetical protein                                   |
| group_184  | hypothetical protein                                   |
| group_28   | hypothetical protein                                   |
| group_192  | hypothetical protein                                   |
| group_15   | hypothetical protein                                   |
| group_286  | hypothetical protein                                   |
| group_155  | hypothetical protein                                   |
| group_20   | hypothetical protein                                   |
| group_260  | hypothetical protein                                   |
| group_2225 | hypothetical protein                                   |
| group_299  | hypothetical protein                                   |
| gatA_2     | PTS system galactitol-specific EIIA component          |
| group_284  | hypothetical protein                                   |
| group_271  | hypothetical protein                                   |
| lytB_1     | Putative endo-beta-N-acetylglucosaminidase             |
| group_49   | hypothetical protein                                   |
| group_113  | hypothetical protein                                   |
| group_270  | hypothetical protein                                   |
| group_41   | hypothetical protein                                   |
| hlyB_2     | Alpha-hemolysin translocation ATP-binding protein HlyB |
| group_145  | hypothetical protein                                   |
| group_58   | hypothetical protein                                   |
| hlyB_1     | Alpha-hemolysin translocation ATP-binding protein HlyB |

|            |                                                        |
|------------|--------------------------------------------------------|
| group_2    | hypothetical protein                                   |
| group_2197 | hypothetical protein                                   |
| group_100  | hypothetical protein                                   |
| group_123  | hypothetical protein                                   |
| group_2198 | hypothetical protein                                   |
| group_98   | hypothetical protein                                   |
| group_151  | Alpha-hemolysin translocation ATP-binding protein HlyB |
| group_201  | hypothetical protein                                   |
| group_110  | Elongation factor Tu                                   |
| group_24   | hypothetical protein                                   |
| group_85   | hypothetical protein                                   |
| group_134  | hypothetical protein                                   |
| group_296  | hypothetical protein                                   |
| group_43   | hypothetical protein                                   |
| group_52   | hypothetical protein                                   |
| group_60   | hypothetical protein                                   |
| group_157  | hypothetical protein                                   |
| group_77   | hypothetical protein                                   |
| group_87   | hypothetical protein                                   |
| group_99   | hypothetical protein                                   |
| group_111  | Elongation factor Tu                                   |
| group_25   | hypothetical protein                                   |
| group_120  | PTS system galactitol-specific EIIA component          |
| group_39   | hypothetical protein                                   |
| group_101  | hypothetical protein                                   |
| group_316  | hypothetical protein                                   |
| group_32   | hypothetical protein                                   |
| group_112  | hypothetical protein                                   |
| group_259  | hypothetical protein                                   |
| group_51   | hypothetical protein                                   |
| group_149  | Alpha-hemolysin translocation ATP-binding protein HlyB |

|            |                                      |
|------------|--------------------------------------|
| group_205  | hypothetical protein                 |
| group_301  | hypothetical protein                 |
| group_303  | hypothetical protein                 |
| group_152  | hypothetical protein                 |
| group_54   | hypothetical protein                 |
| group_59   | hypothetical protein                 |
| group_76   | hypothetical protein                 |
| group_193  | hypothetical protein                 |
| group_22   | hypothetical protein                 |
| group_26   | hypothetical protein                 |
| group_84   | hypothetical protein                 |
| group_177  | hypothetical protein                 |
| group_19   | hypothetical protein                 |
| group_2223 | hypothetical protein                 |
| group_268  | hypothetical protein                 |
| epsJ_3     | putative glycosyltransferase EpsJ    |
| group_129  | hypothetical protein                 |
| group_44   | hypothetical protein                 |
| group_131  | Group II intron-encoded protein LtrA |
| group_163  | hypothetical protein                 |
| group_181  | hypothetical protein                 |
| group_97   | hypothetical protein                 |
| group_139  | hypothetical protein                 |
| group_23   | hypothetical protein                 |
| group_27   | hypothetical protein                 |
| group_153  | hypothetical protein                 |
| group_160  | hypothetical protein                 |
| group_203  | hypothetical protein                 |
| group_313  | hypothetical protein                 |
| group_36   | hypothetical protein                 |
| group_45   | hypothetical protein                 |

|            |                                                  |
|------------|--------------------------------------------------|
| eabC       | Blood-group-substance endo-14-beta-galactosidase |
| group_159  | hypothetical protein                             |
| group_171  | hypothetical protein                             |
| group_21   | hypothetical protein                             |
| group_216  | hypothetical protein                             |
| group_267  | hypothetical protein                             |
| group_302  | hypothetical protein                             |
| group_46   | hypothetical protein                             |
| group_1    | hypothetical protein                             |
| group_119  | hypothetical protein                             |
| group_173  | hypothetical protein                             |
| group_204  | hypothetical protein                             |
| group_2224 | hypothetical protein                             |
| group_48   | hypothetical protein                             |
| group_7    | hypothetical protein                             |
| group_137  | hypothetical protein                             |
| group_18   | hypothetical protein                             |
| group_233  | hypothetical protein                             |
| group_30   | hypothetical protein                             |
| group_317  | hypothetical protein                             |
| group_319  | Putative endo-beta-N-acetylglucosaminidase       |
| group_324  | hypothetical protein                             |
| group_42   | hypothetical protein                             |
| group_125  | hypothetical protein                             |
| group_132  | Group II intron-encoded protein LtrA             |
| group_190  | Pil-type proteinase                              |
| group_213  | hypothetical protein                             |
| group_31   | hypothetical protein                             |
| group_325  | hypothetical protein                             |
| group_55   | hypothetical protein                             |
| group_75   | hypothetical protein                             |

|            |                        |
|------------|------------------------|
| group_83   | hypothetical protein   |
| group_89   | hypothetical protein   |
| ydcP       | putative protease YdcP |
| group_116  | hypothetical protein   |
| group_128  | hypothetical protein   |
| group_13   | hypothetical protein   |
| group_135  | hypothetical protein   |
| group_178  | hypothetical protein   |
| group_304  | hypothetical protein   |
| group_33   | hypothetical protein   |
| group_56   | hypothetical protein   |
| group_81   | hypothetical protein   |
| group_86   | hypothetical protein   |
| group_146  | hypothetical protein   |
| group_158  | hypothetical protein   |
| group_183  | hypothetical protein   |
| group_62   | hypothetical protein   |
| group_9    | hypothetical protein   |
| group_95   | hypothetical protein   |
| group_140  | hypothetical protein   |
| group_154  | hypothetical protein   |
| group_172  | hypothetical protein   |
| group_2180 | hypothetical protein   |
| group_273  | hypothetical protein   |
| group_29   | hypothetical protein   |
| group_315  | hypothetical protein   |
| group_63   | hypothetical protein   |
| group_8    | hypothetical protein   |
| group_82   | hypothetical protein   |
| group_11   | hypothetical protein   |
| group_114  | Elongation factor Tu   |

|            |                                      |
|------------|--------------------------------------|
| group_12   | hypothetical protein                 |
| group_1302 | hypothetical protein                 |
| group_133  | Group II intron-encoded protein LtrA |
| group_176  | hypothetical protein                 |
| group_179  | hypothetical protein                 |
| group_230  | hypothetical protein                 |
| group_3    | hypothetical protein                 |
| group_37   | hypothetical protein                 |
| group_53   | hypothetical protein                 |
| group_61   | hypothetical protein                 |
| group_88   | hypothetical protein                 |
| group_93   | hypothetical protein                 |
| group_107  | Elongation factor Tu                 |
| group_108  | Elongation factor Tu                 |
| group_117  | hypothetical protein                 |
| group_121  | hypothetical protein                 |
| group_16   | hypothetical protein                 |
| group_170  | hypothetical protein                 |
| group_185  | hypothetical protein                 |
| group_202  | hypothetical protein                 |
| group_206  | hypothetical protein                 |
| group_2231 | hypothetical protein                 |
| group_232  | hypothetical protein                 |
| group_241  | hypothetical protein                 |
| group_269  | hypothetical protein                 |
| group_322  | hypothetical protein                 |
| group_326  | hypothetical protein                 |
| group_35   | hypothetical protein                 |
| group_4    | hypothetical protein                 |
| group_40   | hypothetical protein                 |
| group_5    | hypothetical protein                 |

|            |                                                  |
|------------|--------------------------------------------------|
| group_57   | hypothetical protein                             |
| group_65   | hypothetical protein                             |
| group_69   | hypothetical protein                             |
| group_73   | hypothetical protein                             |
| group_80   | hypothetical protein                             |
| group_91   | hypothetical protein                             |
| msbA_2     | Lipid A export ATP-binding/permease protein MsbA |
| cshC       | DEAD-box ATP-dependent RNA helicase CshC         |
| dppB       | Dipeptide transport system permease protein DppB |
| group_102  | hypothetical protein                             |
| group_104  | hypothetical protein                             |
| group_105  | hypothetical protein                             |
| group_109  | Elongation factor Tu                             |
| group_115  | hypothetical protein                             |
| group_118  | hypothetical protein                             |
| group_127  | hypothetical protein                             |
| group_136  | hypothetical protein                             |
| group_14   | hypothetical protein                             |
| group_142  | hypothetical protein                             |
| group_1493 | hypothetical protein                             |
| group_161  | hypothetical protein                             |
| group_162  | hypothetical protein                             |
| group_167  | hypothetical protein                             |
| group_17   | hypothetical protein                             |
| group_174  | hypothetical protein                             |
| group_175  | hypothetical protein                             |
| group_180  | hypothetical protein                             |
| group_189  | hypothetical protein                             |
| group_196  | putative glycosyltransferase EpsJ                |
| group_197  | putative glycosyltransferase EpsJ                |
| group_212  | Alcohol dehydrogenase                            |

|            |                                                                 |
|------------|-----------------------------------------------------------------|
| group_218  | hypothetical protein                                            |
| group_2182 | hypothetical protein                                            |
| group_222  | PTS system lactose-specific EIICB component                     |
| group_229  | hypothetical protein                                            |
| group_231  | hypothetical protein                                            |
| group_282  | Arginine repressor                                              |
| group_305  | hypothetical protein                                            |
| group_306  | hypothetical protein                                            |
| group_307  | Lactococcin-G-processing and transport ATP-binding protein LagD |
| group_308  | 50S ribosomal protein L4                                        |
| group_309  | hypothetical protein                                            |
| group_310  | hypothetical protein                                            |
| group_311  | hypothetical protein                                            |
| group_312  | hypothetical protein                                            |
| group_314  | hypothetical protein                                            |
| group_318  | hypothetical protein                                            |
| group_320  | hypothetical protein                                            |
| group_321  | hypothetical protein                                            |
| group_323  | hypothetical protein                                            |
| group_327  | hypothetical protein                                            |
| group_328  | Immunoglobulin A1 protease                                      |
| group_329  | hypothetical protein                                            |
| group_331  | hypothetical protein                                            |
| group_332  | hypothetical protein                                            |
| group_50   | hypothetical protein                                            |
| group_6    | hypothetical protein                                            |
| group_64   | hypothetical protein                                            |
| group_67   | hypothetical protein                                            |
| group_68   | hypothetical protein                                            |
| group_70   | hypothetical protein                                            |
| group_72   | hypothetical protein                                            |

|           |                                                                                           |
|-----------|-------------------------------------------------------------------------------------------|
| group_74  | hypothetical protein                                                                      |
| group_78  | hypothetical protein                                                                      |
| group_79  | hypothetical protein                                                                      |
| group_863 | hypothetical protein                                                                      |
| group_92  | hypothetical protein                                                                      |
| group_94  | hypothetical protein                                                                      |
| ldh_1     | L-lactate dehydrogenase                                                                   |
| mfd_2     | Transcription-repair-coupling factor                                                      |
| sucB      | Dihydrolipoyllysine-residue succinyltransferase component of 2-oxoglutarate dehydrogenase |

[illegible]

|    |    |   |   |   |   |   |
|----|----|---|---|---|---|---|
| 66 | 66 | 1 | 1 | 1 | 1 | 1 |
| 66 | 66 | 1 | 1 | 1 | 1 | 1 |
| 66 | 66 | 1 | 1 | 1 | 1 | 1 |
| 66 | 66 | 1 | 1 | 1 | 1 | 1 |
| 66 | 66 | 1 | 1 | 1 | 1 | 1 |
| 66 | 66 | 1 | 1 | 1 | 1 | 1 |
| 66 | 66 | 1 | 1 | 1 | 1 | 1 |
| 65 | 65 | 1 | 1 | 1 | 1 | 1 |
| 65 | 65 | 1 | 1 | 1 | 1 | 1 |
| 65 | 65 | 1 | 1 | 1 | 1 | 1 |
| 65 | 65 | 1 | 1 | 1 | 1 | 1 |
| 65 | 65 | 1 |   | 1 | 1 | 1 |
| 65 | 65 | 1 | 1 | 1 | 1 | 1 |
| 64 | 64 |   | 1 | 1 | 1 | 1 |
| 64 | 68 | 1 | 1 | 1 | 1 | 1 |
| 63 | 63 | 1 | 1 | 1 | 1 | 1 |
| 63 | 70 | 1 | 1 | 1 | 1 | 1 |
| 62 | 62 |   | 1 | 1 | 1 | 1 |
| 62 | 62 |   | 1 | 1 | 1 | 1 |
| 61 | 61 | 1 | 1 | 1 | 1 | 1 |
| 61 | 61 | 1 | 1 | 1 | 1 | 1 |
| 60 | 60 | 1 | 1 | 1 | 1 | 1 |
| 60 | 60 | 1 | 1 | 1 | 1 | 1 |
| 60 | 60 | 1 | 1 | 1 | 1 | 1 |
| 59 | 59 | 1 | 1 | 1 | 1 | 1 |
| 59 | 59 | 1 | 1 | 1 | 1 | 1 |
| 59 | 59 | 1 | 1 | 1 | 1 | 1 |
| 58 | 58 |   | 1 | 1 | 1 | 1 |
| 57 | 57 | 1 | 1 |   | 1 | 1 |
| 57 | 57 | 1 | 1 |   | 1 | 1 |
| 56 | 56 | 1 |   | 1 | 1 |   |

|    |    |   |   |   |   |   |
|----|----|---|---|---|---|---|
| 56 | 56 | 1 | 1 | 1 |   | 1 |
| 56 | 56 |   | 1 | 1 | 1 | 1 |
| 54 | 54 |   | 1 | 1 | 1 | 1 |
| 54 | 54 | 1 | 1 | 1 | 1 | 1 |
| 53 | 53 |   | 1 |   | 1 | 1 |
| 52 | 52 | 1 | 1 |   | 1 | 1 |
| 52 | 52 |   | 1 | 1 |   | 1 |
| 52 | 54 |   | 1 |   | 1 | 1 |
| 51 | 51 |   |   | 1 | 1 | 1 |
| 51 | 51 |   | 1 | 1 | 1 | 1 |
| 51 | 51 |   | 1 |   | 1 | 1 |
| 50 | 50 | 1 | 1 | 1 | 1 | 1 |
| 49 | 53 | 1 | 1 |   | 1 | 1 |
| 48 | 48 | 1 | 1 | 1 | 1 | 1 |
| 47 | 47 | 1 |   | 1 |   | 1 |
| 47 | 47 | 1 |   | 1 | 1 | 1 |
| 47 | 47 | 1 |   | 1 |   | 1 |
| 46 | 46 | 1 |   | 1 |   | 1 |
| 45 | 45 |   | 1 |   |   |   |
| 44 | 44 |   | 1 |   | 1 |   |
| 44 | 44 | 1 |   | 1 |   | 1 |
| 43 | 43 | 1 | 1 |   | 1 |   |
| 43 | 43 |   |   | 1 | 1 | 1 |
| 42 | 42 |   |   |   | 1 | 1 |
| 41 | 41 |   |   | 1 | 1 |   |
| 41 | 41 | 1 | 1 | 1 | 1 |   |
| 41 | 41 |   |   |   | 1 | 1 |
| 40 | 40 | 1 | 1 |   | 1 | 1 |
| 39 | 39 |   |   | 1 |   | 1 |
| 39 | 39 |   | 1 |   | 1 | 1 |
| 38 | 38 |   |   | 1 |   |   |

|    |    |   |   |   |   |   |
|----|----|---|---|---|---|---|
| 37 | 37 | 1 | 1 | 1 |   |   |
| 37 | 37 | 1 | 1 | 1 |   |   |
| 36 | 36 |   |   | 1 |   | 1 |
| 35 | 35 | 1 |   |   | 1 | 1 |
| 34 | 34 |   |   |   | 1 | 1 |
| 34 | 34 |   | 1 |   | 1 | 1 |
| 33 | 33 |   | 1 | 1 |   |   |
| 33 | 33 |   |   | 1 | 1 | 1 |
| 32 | 32 |   |   | 1 |   | 1 |
| 32 | 44 | 1 |   |   | 1 | 1 |
| 32 | 32 |   |   |   |   |   |
| 30 | 30 | 1 | 1 |   | 1 | 1 |
| 30 | 30 | 1 | 1 |   | 1 |   |
| 30 | 31 |   |   |   | 1 | 1 |
| 30 | 30 | 1 |   | 1 | 1 | 1 |
| 30 | 30 |   |   |   | 1 | 1 |
| 29 | 29 |   |   |   | 1 | 1 |
| 28 | 28 |   |   |   |   |   |
| 27 | 27 | 1 | 1 |   | 1 | 1 |
| 27 | 27 |   |   |   |   |   |
| 25 | 25 |   | 1 |   |   |   |
| 25 | 25 |   |   |   |   | 1 |
| 24 | 24 | 1 |   | 1 |   | 1 |
| 24 | 24 |   | 1 |   |   |   |
| 23 | 23 |   | 1 | 1 | 1 |   |
| 22 | 22 |   |   |   |   |   |
| 22 | 22 |   | 1 | 1 |   |   |
| 21 | 21 |   |   |   |   | 1 |
| 21 | 21 |   | 1 |   | 1 |   |
| 21 | 21 |   | 1 |   |   |   |
| 20 | 20 | 1 |   |   | 1 | 1 |

|    |    |   |   |   |   |   |
|----|----|---|---|---|---|---|
| 20 | 20 |   |   |   |   | 1 |
| 20 | 20 |   | 1 |   |   |   |
| 20 | 20 |   |   |   | 1 |   |
| 19 | 19 | 1 |   |   | 1 |   |
| 19 | 19 |   |   |   | 1 |   |
| 19 | 19 |   | 1 |   |   |   |
| 19 | 19 |   |   |   |   |   |
| 18 | 18 |   |   |   |   |   |
| 18 | 18 |   |   |   |   |   |
| 18 | 24 |   |   |   | 1 |   |
| 18 | 18 |   |   |   |   |   |
| 17 | 17 |   |   |   |   | 1 |
| 16 | 16 |   |   |   |   | 1 |
| 16 | 16 |   |   |   | 1 |   |
| 16 | 16 |   |   |   |   |   |
| 15 | 15 |   | 1 |   |   |   |
| 15 | 15 |   | 1 |   |   |   |
| 15 | 15 |   |   |   |   |   |
| 14 | 14 |   |   | 1 | 1 |   |
| 14 | 14 |   | 1 |   |   |   |
| 14 | 14 |   |   |   |   |   |
| 14 | 14 |   | 1 |   | 1 |   |
| 13 | 13 | 1 | 1 | 1 |   |   |
| 13 | 13 |   |   |   | 1 |   |
| 13 | 13 |   |   |   |   |   |
| 12 | 12 |   | 1 |   | 1 |   |
| 12 | 12 |   |   |   | 1 |   |
| 12 | 12 |   |   |   |   |   |
| 12 | 12 |   |   |   |   |   |
| 12 | 12 |   |   |   | 1 |   |
| 11 | 11 | 1 |   |   |   |   |

10  
10  
10  
10  
10  
10  
10  
10  
10  
9  
9  
9  
9  
9  
9  
9  
9  
8  
8  
8  
8  
8  
8  
8  
8  
8  
7  
7  
7  
7  
7  
7  
7  
7

10  
10  
10  
10  
10  
10  
10  
10  
10  
10  
9  
9  
9  
9  
9  
9  
8  
8  
8  
8  
8  
8  
8  
8  
7  
7  
7  
7  
7  
7  
7

1

1

1

1

1

1

1

1

1

1

1

7  
7  
7  
6  
6  
6  
6  
6  
6  
6  
6  
6  
6  
5  
5  
5  
5  
5  
5  
4  
4  
4  
4  
4  
4  
4  
4  
4  
3  
3

7  
7  
7  
6  
6  
6  
6  
6  
6  
6  
6  
6  
5  
5  
5  
5  
5  
4  
4  
4  
4  
4  
4  
4  
4  
4  
3  
3

1

1

1

1

1







|   |   |   |
|---|---|---|
| 1 | 1 |   |
| 1 | 1 |   |
| 1 | 1 |   |
| 1 | 1 |   |
| 1 | 1 |   |
| 1 | 1 | 1 |
| 1 | 1 |   |
| 1 | 1 |   |
| 1 | 1 |   |















































































[illegible]

[illegible]



[illegible]

[illegible]

[illegible]
