# Supplementary material for: Genomic Characteristics of Invasive Streptococcus pneumoniae Serotype 1 in New Caledonia Prior to the Introduction of PCV13
Source: PubMed Central journal article supplement — Bioinform Biol Insights. 2020 Sep 29;14:1177932220962106. doi: 10.1177/1177932220962106 (PMC7545519; doi:10.1177/1177932220962106), 2020-09-29
Supplement: Supplementary_table_S5_xyz47336611a7bb5.pdf [file Supplementary_table_S5_xyz47336611a7bb5.pdf]

| Gene              | Annotation                                                | Classification         | Uniprot or gene ID |
|-------------------|-----------------------------------------------------------|------------------------|--------------------|
| <b>pfbA</b>       | Plasminand fibronectin-binding protein A                  | Adherence              | Q8CYC9             |
| <b>lmb/AdcAll</b> | Laminin-binding protein                                   | Adherence              | Q8DQ09             |
| <b>pavA</b>       | Pneumococcal adherence and virulence factor A             | Adherence              | Q8DQ36             |
| <b>pitA</b>       | Minor pilin PitA                                          | Adherence              | G6J811             |
| <b>pitB</b>       | Minor pilin PitB                                          | Adherence              | B3FNV5             |
| <b>plr/gapA</b>   | Streptococcal plasmin receptor/GAPDH                      | Adherence              | Q8CWN6             |
| <b>sirA</b>       | Streptococcal lipoprotein rotamase A                      | Adherence              | NP_345269          |
| <b>srtA</b>       | Sortase A                                                 | Adherence              | Q8DPM3             |
| <b>srtG1</b>      | Sortase G1                                                | Adherence              | B3FNT5             |
| <b>cbpD</b>       | Choline binding proteine D                                | Adherence              | Q9KGZ2             |
| <b>cbpG</b>       | Choline binding proteine G                                | Adherence              | Q8DR40             |
| <b>cbpE/pce</b>   | Choline binding proteine E                                | Adherence              | Q8CWU2             |
| <b>cps2A</b>      | Integral membrane regulatory protein Cps2A                | Adherence              | Q9ZII9             |
| <b>lytA</b>       | Autolysin                                                 | Adherence              | P06653             |
| <b>lytC</b>       | Lysozyme                                                  | Adherence              | Q8DP07             |
| <b>lytB</b>       | murein hydrolase                                          | Adherence              | P59206             |
| <b>nanB</b>       | Neuraminidase B                                           | Enzyme                 | Q54727             |
| <b>eno</b>        | Streptococcal enolase                                     | Enzyme                 | Q54873             |
| <b>hysA/Hyl</b>   | Hyaluronidase                                             | Enzyme                 | Q97QS2             |
| <b>nanA</b>       | Neuraminidase A                                           | Enzyme                 | P62575             |
| <b>sipA</b>       | Surface immunogenic protein                               | Immunoreactive antigen | U5LJR8             |
| <b>piaA</b>       | Pneumococcal iron acquisition                             | Manganese uptake       | Q8DPY6             |
| <b>piuA</b>       | Pneumococcal iron uptake                                  | Manganese uptake       | NP_346304          |
| <b>psaA</b>       | Pneumococcal surface antigen A / Metal binding protein Sk | Manganese uptake       | P0A4G3             |
| <b>cppA</b>       | C3-degrading protease                                     | protease               | Q8DP81             |
| <b>htrA/degP</b>  | Serine protease                                           | protease               | M5JZR5             |
| <b>iga</b>        | IgA1 protease                                             | Protease               | Q59947             |
| <b>tig/ropA</b>   | Trigger factor                                            | Protease               | Q8DR29             |
| <b>ply</b>        | Pneumolysin                                               | Toxin                  | Q7ZAK5             |
