# Supplementary material for: Genomic Characteristics of Invasive Streptococcus pneumoniae Serotype 1 in New Caledonia Prior to the Introduction of PCV13
Source: PubMed Central journal article supplement — Bioinform Biol Insights. 2020 Sep 29;14:1177932220962106. doi: 10.1177/1177932220962106 (PMC7545519; doi:10.1177/1177932220962106), 2020-09-29
Supplement: Supplementary_table_S6_xyz47336d0793983.pdf [file Supplementary_table_S6_xyz47336d0793983.pdf]

| Node       | Total SNPs | Num of SNPs inside recombinations |
|------------|------------|-----------------------------------|
| 10395_8_13 | 0          | 0                                 |
| 10395_8_35 | 100        | 72                                |
| 10395_8_56 | 0          | 0                                 |
| 10263_7_45 | 0          | 0                                 |
| 10395_8_52 | 0          | 0                                 |
| 10395_8_36 | 137        | 111                               |
| 10395_8_24 | 0          | 0                                 |
| 10263_7_46 | 1          | 0                                 |
| 10395_8_17 | 102        | 69                                |
| 10395_8_18 | 0          | 0                                 |
| 10395_8_9  | 93         | 64                                |
| 10395_8_34 | 140        | 106                               |
| 10395_8_58 | 143        | 82                                |
| 10395_8_15 | 0          | 0                                 |
| 10395_8_26 | 166        | 138                               |
| 10395_8_30 | 0          | 0                                 |
| 10263_7_40 | 191        | 146                               |
| 10395_8_51 | 171        | 138                               |
| 10263_7_16 | 153        | 116                               |
| 10263_7_47 | 46         | 32                                |
| 10395_8_37 | 35         | 6                                 |
| 10395_8_22 | 338        | 309                               |
| 10263_7_53 | 0          | 0                                 |
| 10395_8_19 | 182        | 162                               |
| 10263_7_2  | 84         | 68                                |
| 10395_8_41 | 45         | 11                                |
| 10263_7_11 | 276        | 232                               |
| 10263_7_43 | 150        | 100                               |
| 10395_8_68 | 0          | 0                                 |
| 10395_8_48 | 88         | 37                                |
| 10263_7_12 | 172        | 131                               |
| 10395_8_57 | 6          | 0                                 |
| 10395_8_66 | 72         | 51                                |
| 10395_8_61 | 0          | 0                                 |
| 10395_8_1  | 44         | 22                                |
| 10263_7_10 | 0          | 0                                 |
| 10702_4_42 | 176        | 158                               |
| 10263_7_23 | 0          | 0                                 |
| 10395_8_33 | 328        | 299                               |
| 10263_7_14 | 10         | 9                                 |
| 10395_8_25 | 379        | 337                               |
| 10395_8_8  | 0          | 0                                 |

|             |     |     |
|-------------|-----|-----|
| 10395_8_28  | 0   | 0   |
| 10263_7_39  | 300 | 267 |
| 10263_7_64  | 0   | 0   |
| 10263_7_32  | 77  | 58  |
| 10395_8_67  | 8   | 0   |
| 10395_8_6   | 130 | 93  |
| 10263_7_27  | 69  | 40  |
| 10395_8_21  | 99  | 60  |
| 10263_7_60  | 87  | 64  |
| 10263_7_3   | 89  | 65  |
| 10395_8_50  | 121 | 85  |
| 10263_7_65  | 140 | 103 |
| 10263_7_7   | 414 | 346 |
| 10395_8_38  | 114 | 76  |
| 10263_7_49  | 119 | 94  |
| 10395_8_29  | 218 | 181 |
| 10395_8_62  | 166 | 132 |
| 10395_8_42  | 0   | 0   |
| 10263_7_5   | 199 | 180 |
| 10395_8_20  | 0   | 0   |
| 10395_8_31  | 188 | 152 |
| 10263_7_63  | 0   | 0   |
| 10395_8_55  | 0   | 0   |
| 10263_7_44  | 0   | 0   |
| 10395_8_54  | 0   | 0   |
| internal_69 | 174 | 125 |
| internal_76 | 51  | 39  |
| internal_75 | 57  | 30  |
| internal_74 | 220 | 130 |
| internal_80 | 103 | 67  |
| internal_83 | 13  | 4   |
| internal_82 | 191 | 162 |
| internal_81 | 156 | 84  |
| internal_79 | 403 | 324 |
| internal_88 | 166 | 144 |
| internal_87 | 6   | 0   |
| internal_86 | 86  | 60  |
| internal_85 | 21  | 0   |
| internal_84 | 532 | 460 |
| internal_78 | 442 | 404 |
| internal_77 | 482 | 338 |
| internal_73 | 158 | 141 |
| internal_72 | 33  | 13  |

|              |      |      |
|--------------|------|------|
| internal_71  | 1433 | 1254 |
| internal_95  | 201  | 148  |
| internal_94  | 199  | 152  |
| internal_100 | 235  | 200  |
| internal_102 | 20   | 10   |
| internal_101 | 536  | 499  |
| internal_99  | 783  | 701  |
| internal_107 | 101  | 92   |
| internal_108 | 81   | 40   |
| internal_106 | 549  | 496  |
| internal_110 | 65   | 55   |
| internal_109 | 91   | 55   |
| internal_105 | 87   | 9    |
| internal_104 | 433  | 337  |
| internal_112 | 127  | 102  |
| internal_114 | 201  | 144  |
| internal_113 | 237  | 201  |
| internal_111 | 412  | 337  |
| internal_103 | 789  | 681  |
| internal_98  | 252  | 207  |
| internal_97  | 231  | 183  |
| internal_117 | 69   | 40   |
| internal_116 | 3    | 0    |
| internal_115 | 1222 | 1167 |
| internal_96  | 723  | 657  |
| internal_93  | 127  | 105  |
| internal_92  | 130  | 83   |
| internal_91  | 2083 | 1968 |
| internal_124 | 110  | 71   |
| internal_123 | 88   | 53   |
| internal_129 | 6    | 0    |
| internal_130 | 258  | 156  |
| internal_128 | 140  | 107  |
| internal_127 | 17   | 7    |
| internal_126 | 143  | 127  |
| internal_125 | 762  | 680  |
| internal_122 | 253  | 232  |
| internal_121 | 163  | 154  |
| internal_132 | 171  | 140  |
| internal_131 | 570  | 533  |
| internal_120 | 86   | 77   |
| internal_68  | 781  | 729  |
| internal_119 | 332  | 288  |

|              |      |      |
|--------------|------|------|
| internal_118 | 1177 | 1115 |
| internal_90  | 531  | 495  |
| internal_89  | 3334 | 3148 |
| internal_70  | 661  | 589  |
| internal_ROO | 0    | 0    |

| Num of SNPs outside recombinations | Num of Recombination Blocks |
|------------------------------------|-----------------------------|
| 0                                  | 0                           |
| 28                                 | 6                           |
| 0                                  | 0                           |
| 0                                  | 0                           |
| 0                                  | 0                           |
| 26                                 | 7                           |
| 0                                  | 0                           |
| 1                                  | 0                           |
| 33                                 | 4                           |
| 0                                  | 0                           |
| 29                                 | 2                           |
| 34                                 | 5                           |
| 61                                 | 7                           |
| 0                                  | 0                           |
| 28                                 | 6                           |
| 0                                  | 0                           |
| 45                                 | 7                           |
| 33                                 | 9                           |
| 37                                 | 9                           |
| 14                                 | 4                           |
| 29                                 | 1                           |
| 29                                 | 7                           |
| 0                                  | 0                           |
| 20                                 | 5                           |
| 16                                 | 6                           |
| 34                                 | 1                           |
| 44                                 | 11                          |
| 50                                 | 5                           |
| 0                                  | 0                           |
| 51                                 | 3                           |
| 41                                 | 9                           |
| 6                                  | 0                           |
| 21                                 | 4                           |
| 0                                  | 0                           |
| 22                                 | 3                           |
| 0                                  | 0                           |
| 18                                 | 5                           |
| 0                                  | 0                           |
| 29                                 | 8                           |
| 1                                  | 1                           |
| 42                                 | 10                          |
| 0                                  | 0                           |

|     |    |
|-----|----|
| 0   | 0  |
| 33  | 11 |
| 0   | 0  |
| 19  | 5  |
| 8   | 0  |
| 37  | 4  |
| 29  | 4  |
| 39  | 3  |
| 23  | 7  |
| 24  | 5  |
| 36  | 5  |
| 37  | 7  |
| 68  | 8  |
| 38  | 4  |
| 25  | 7  |
| 37  | 16 |
| 34  | 11 |
| 0   | 0  |
| 19  | 9  |
| 0   | 0  |
| 36  | 8  |
| 0   | 0  |
| 0   | 0  |
| 0   | 0  |
| 49  | 8  |
| 12  | 4  |
| 27  | 5  |
| 90  | 6  |
| 36  | 6  |
| 9   | 1  |
| 29  | 5  |
| 72  | 6  |
| 79  | 12 |
| 22  | 5  |
| 6   | 0  |
| 26  | 4  |
| 21  | 0  |
| 72  | 12 |
| 38  | 12 |
| 144 | 13 |
| 17  | 2  |
| 20  | 2  |

|     |    |
|-----|----|
| 179 | 43 |
| 53  | 10 |
| 47  | 8  |
| 35  | 6  |
| 10  | 1  |
| 37  | 10 |
| 82  | 13 |
| 9   | 5  |
| 41  | 3  |
| 53  | 12 |
| 10  | 2  |
| 36  | 5  |
| 78  | 1  |
| 96  | 12 |
| 25  | 5  |
| 57  | 6  |
| 36  | 5  |
| 75  | 12 |
| 108 | 23 |
| 45  | 9  |
| 48  | 12 |
| 29  | 4  |
| 3   | 0  |
| 55  | 25 |
| 66  | 22 |
| 22  | 8  |
| 47  | 5  |
| 115 | 34 |
| 39  | 8  |
| 35  | 6  |
| 6   | 0  |
| 102 | 8  |
| 33  | 9  |
| 10  | 1  |
| 16  | 2  |
| 82  | 18 |
| 21  | 6  |
| 9   | 3  |
| 31  | 9  |
| 37  | 12 |
| 9   | 6  |
| 52  | 16 |
| 44  | 12 |

62  
36  
186  
72  
0

28  
11  
52  
16  
0



| <b>Bases in Recombinations</b> | <b>r/m</b> | <b>rho/theta</b> |
|--------------------------------|------------|------------------|
| 168498                         | 0          | 0                |
| 400759                         | 2.571429   | 0.214286         |
| 415850                         | 0          | 0                |
| 342088                         | 0          | 0                |
| 395098                         | 0          | 0                |
| 409869                         | 4.269231   | 0.269231         |
| 406361                         | 0          | 0                |
| 286868                         | 0          | 0                |
| 358775                         | 2.090909   | 0.121212         |
| 286881                         | 0          | 0                |
| 303034                         | 2.206897   | 0.068966         |
| 388051                         | 3.117647   | 0.147059         |
| 410014                         | 1.344262   | 0.114754         |
| 380258                         | 0          | 0                |
| 407405                         | 4.928571   | 0.214286         |
| 293817                         | 0          | 0                |
| 254334                         | 3.244444   | 0.155556         |
| 416429                         | 4.181818   | 0.272727         |
| 387322                         | 3.135135   | 0.243243         |
| 401996                         | 2.285714   | 0.285714         |
| 399980                         | 0.206897   | 0.034483         |
| 300701                         | 10.655172  | 0.241379         |
| 365346                         | 0          | 0                |
| 357331                         | 8.1        | 0.25             |
| 301944                         | 4.25       | 0.375            |
| 407235                         | 0.323529   | 0.029412         |
| 370505                         | 5.272727   | 0.25             |
| 397587                         | 2          | 0.1              |
| 301915                         | 0          | 0                |
| 349212                         | 0.72549    | 0.058824         |
| 388087                         | 3.195122   | 0.219512         |
| 387122                         | 0          | 0                |
| 390687                         | 2.428571   | 0.190476         |
| 357324                         | 0          | 0                |
| 293740                         | 1          | 0.136364         |
| 253760                         | 0          | 0                |
| 294056                         | 8.777778   | 0.277778         |
| 387216                         | 0          | 0                |
| 297663                         | 10.310345  | 0.275862         |
| 253580                         | 9          | 1                |
| 307933                         | 8.023809   | 0.238095         |
| 377306                         | 0          | 0                |

|        |           |          |
|--------|-----------|----------|
| 345414 | 0         | 0        |
| 385401 | 8.090909  | 0.333333 |
| 286929 | 0         | 0        |
| 365742 | 3.052632  | 0.263158 |
| 342854 | 0         | 0        |
| 345426 | 2.513514  | 0.108108 |
| 358795 | 1.37931   | 0.137931 |
| 408984 | 1.538462  | 0.076923 |
| 390600 | 2.782609  | 0.304348 |
| 377568 | 2.708333  | 0.208333 |
| 168585 | 2.361111  | 0.138889 |
| 273120 | 2.783784  | 0.189189 |
| 294976 | 5.088235  | 0.117647 |
| 360582 | 2         | 0.105263 |
| 275419 | 3.76      | 0.28     |
| 343184 | 4.891892  | 0.432432 |
| 379343 | 3.882353  | 0.323529 |
| 399045 | 0         | 0        |
| 387226 | 9.473684  | 0.473684 |
| 253587 | 0         | 0        |
| 297009 | 4.222222  | 0.222222 |
| 378475 | 0         | 0        |
| 407235 | 0         | 0        |
| 406456 | 0         | 0        |
| 388051 | 0         | 0        |
| 168498 | 2.55102   | 0.163265 |
| 253760 | 3.25      | 0.333333 |
| 253587 | 1.111111  | 0.185185 |
| 253580 | 1.444444  | 0.066667 |
| 301915 | 1.861111  | 0.166667 |
| 293817 | 0.444444  | 0.111111 |
| 293806 | 5.586207  | 0.172414 |
| 293729 | 1.166667  | 0.083333 |
| 290739 | 4.101266  | 0.151899 |
| 286929 | 6.545455  | 0.227273 |
| 286881 | 0         | 0        |
| 286881 | 2.307692  | 0.153846 |
| 286868 | 0         | 0        |
| 286868 | 6.388889  | 0.166667 |
| 286186 | 10.631579 | 0.315789 |
| 273027 | 2.347222  | 0.090278 |
| 252835 | 8.294118  | 0.117647 |
| 252835 | 0.65      | 0.1      |

|        |           |          |
|--------|-----------|----------|
| 252662 | 7.005587  | 0.240223 |
| 395098 | 2.792453  | 0.188679 |
| 380258 | 3.234043  | 0.170213 |
| 387122 | 5.714286  | 0.171429 |
| 387216 | 1         | 0.1      |
| 387203 | 13.486486 | 0.27027  |
| 384946 | 8.54878   | 0.158537 |
| 406361 | 10.222222 | 0.555556 |
| 406456 | 0.97561   | 0.073171 |
| 406346 | 9.358491  | 0.226415 |
| 399045 | 5.5       | 0.2      |
| 399045 | 1.527778  | 0.138889 |
| 398996 | 0.115385  | 0.012821 |
| 398996 | 3.510417  | 0.125    |
| 407235 | 4.08      | 0.2      |
| 415850 | 2.526316  | 0.105263 |
| 407235 | 5.583333  | 0.138889 |
| 407235 | 4.493333  | 0.16     |
| 395392 | 6.305555  | 0.212963 |
| 365641 | 4.6       | 0.2      |
| 360561 | 3.8125    | 0.25     |
| 388051 | 1.37931   | 0.137931 |
| 388001 | 0         | 0        |
| 388001 | 21.218182 | 0.454545 |
| 356087 | 9.954545  | 0.333333 |
| 352075 | 4.772727  | 0.363636 |
| 352052 | 1.765957  | 0.106383 |
| 349125 | 17.113043 | 0.295652 |
| 345414 | 1.820513  | 0.205128 |
| 342854 | 1.514286  | 0.171429 |
| 377306 | 0         | 0        |
| 378475 | 1.529412  | 0.078431 |
| 377306 | 3.242424  | 0.272727 |
| 358775 | 0.7       | 0.1      |
| 358775 | 7.9375    | 0.125    |
| 358775 | 8.292683  | 0.219512 |
| 342789 | 11.047619 | 0.285714 |
| 342088 | 17.111111 | 0.333333 |
| 365739 | 4.516129  | 0.290323 |
| 365346 | 14.405405 | 0.324324 |
| 342080 | 8.555555  | 0.666667 |
| 357324 | 14.019231 | 0.307692 |
| 342080 | 6.545455  | 0.272727 |

341877  
262544  
255420  
64049  
0

17.983871  
13.75  
16.92473  
8.180555  
0

0.451613  
0.305556  
0.27957  
0.222222  
0

**Genome Length****Bases in Clonal Frame**

|         |         |
|---------|---------|
| 2092081 | 2001772 |
| 2077723 | 1871347 |
| 2086174 | 1863504 |
| 2087250 | 1919575 |
| 2086849 | 1878263 |
| 2076965 | 1869218 |
| 2085998 | 1876293 |
| 2084921 | 1920602 |
| 2079296 | 1916780 |
| 2081510 | 1917941 |
| 2077208 | 1923473 |
| 2077499 | 1890226 |
| 2088231 | 1886223 |
| 2087436 | 1897364 |
| 2078918 | 1884415 |
| 2077509 | 1915399 |
| 2054477 | 1916106 |
| 2089398 | 1865689 |
| 2085442 | 1897289 |
| 2088695 | 1894843 |
| 2087860 | 1879149 |
| 2082940 | 1935088 |
| 2088452 | 1907154 |
| 2080737 | 1912701 |
| 2078811 | 1925268 |
| 2088846 | 1873267 |
| 2077010 | 1913786 |
| 2089027 | 1885583 |
| 2076358 | 1921780 |
| 2088002 | 1912980 |
| 2079971 | 1898799 |
| 2088807 | 1893485 |
| 2070686 | 1901293 |
| 2087394 | 1914090 |
| 2076303 | 1918827 |
| 2072734 | 1933387 |
| 2070562 | 1916916 |
| 2083261 | 1890365 |
| 2088131 | 1937087 |
| 2085261 | 1936217 |
| 2075025 | 1922287 |
| 2075106 | 1909706 |

|         |         |
|---------|---------|
| 2070122 | 1922872 |
| 2084680 | 1916343 |
| 2073101 | 1920799 |
| 2081062 | 1905200 |
| 2076751 | 1928301 |
| 2074955 | 1927254 |
| 2077135 | 1913694 |
| 2088207 | 1882318 |
| 2086281 | 1895446 |
| 2081533 | 1909443 |
| 2085194 | 1997766 |
| 2074964 | 1920500 |
| 2073389 | 1918342 |
| 2083075 | 1911114 |
| 2089494 | 1965633 |
| 2081213 | 1920162 |
| 2074225 | 1909097 |
| 2086984 | 1881934 |
| 2080278 | 1889595 |
| 2083539 | 1933622 |
| 2075900 | 1920191 |
| 2077263 | 1911273 |
| 2088782 | 1867161 |
| 2088399 | 1884857 |
| 2089209 | 1897055 |
| 2127566 | 2127566 |
| 2093318 | 1953869 |
| 2197233 | 2044245 |
| 2255469 | 2098009 |
| 2121449 | 1965582 |
| 2134550 | 1970860 |
| 2173870 | 2007120 |
| 2202270 | 2032889 |
| 2249618 | 2080062 |
| 2102517 | 1946247 |
| 2205007 | 2034875 |
| 2236202 | 2065162 |
| 2304215 | 2125765 |
| 2340846 | 2159990 |
| 2501510 | 2319466 |
| 2518909 | 2340060 |
| 2581837 | 2399065 |
| 2613785 | 2424896 |

|         |         |
|---------|---------|
| 2650566 | 2614367 |
| 2103964 | 1907283 |
| 2157173 | 1965170 |
| 2152341 | 1945467 |
| 2120236 | 1921281 |
| 2189712 | 1977655 |
| 2276611 | 2056920 |
| 2135155 | 1921166 |
| 2100699 | 1895974 |
| 2224186 | 1996195 |
| 2187016 | 1962081 |
| 2229766 | 1995874 |
| 2362251 | 2099113 |
| 2370851 | 2104909 |
| 2179921 | 1945997 |
| 2139275 | 1917144 |
| 2152392 | 1928427 |
| 2266885 | 2028324 |
| 2464874 | 2205353 |
| 2568328 | 2290987 |
| 2578222 | 2304695 |
| 2162975 | 1958590 |
| 2178506 | 1971988 |
| 2224006 | 2032252 |
| 2662943 | 2384648 |
| 2689557 | 2403488 |
| 2709731 | 2422406 |
| 2715993 | 2502778 |
| 2113028 | 1964114 |
| 2151690 | 1999918 |
| 2114162 | 1942325 |
| 2115922 | 1947651 |
| 2151859 | 1981226 |
| 2180999 | 2008268 |
| 2212208 | 2038778 |
| 2248245 | 2088878 |
| 2306854 | 2145112 |
| 2415684 | 2231402 |
| 2145872 | 1965858 |
| 2211433 | 2034795 |
| 2548564 | 2343982 |
| 2157564 | 1983124 |
| 2608703 | 2395132 |

2636190  
3123920  
3141007  
3398492  
3428223

2466901  
2896279  
3080493  
3398492  
3428223
